# Supplementary material for: Effect of 4 weeks vs 8 weeks of acupuncture for knee osteoarthritis in China: protocol for a randomised controlled trial
Source: PubMed Central journal article supplement — BMJ Open. 2024 Jan 24;14(1):e079709. doi: 10.1136/bmjopen-2023-079709 (PMC10824056; doi:10.1136/bmjopen-2023-079709), 2024-01-24
Supplement: bmjopen-2023-079709.draft_revisions.pdf [file bmjopen-2023-079709.draft_revisions.pdf]

# BMJ Open

BMJ Open is committed to open peer review. As part of this commitment we make the peer review history of every article we publish publicly available.

When an article is published we post the peer reviewers' comments and the authors' responses online. We also post the versions of the paper that were used during peer review. These are the versions that the peer review comments apply to.

The versions of the paper that follow are the versions that were submitted during the peer review process. They are not the versions of record or the final published versions. They should not be cited or distributed as the published version of this manuscript.

BMJ Open is an open access journal and the full, final, typeset and author-corrected version of record of the manuscript is available on our site with no access controls, subscription charges or pay-per-view fees (<http://bmjopen.bmj.com>).

If you have any questions on BMJ Open's open peer review process please email [info.bmjopen@bmj.com](mailto:info.bmjopen@bmj.com)

# BMJ Open

## The long-term effect of 4 weeks versus 8 weeks of acupuncture for knee osteoarthritis: protocol for a randomized controlled trial

|                               |                                                                                                                                                                                                                                                                                                                                                                                                                                                   |
|-------------------------------|---------------------------------------------------------------------------------------------------------------------------------------------------------------------------------------------------------------------------------------------------------------------------------------------------------------------------------------------------------------------------------------------------------------------------------------------------|
| Journal:                      | <i>BMJ Open</i>                                                                                                                                                                                                                                                                                                                                                                                                                                   |
| Manuscript ID                 | bmjopen-2023-079709                                                                                                                                                                                                                                                                                                                                                                                                                               |
| Article Type:                 | Protocol                                                                                                                                                                                                                                                                                                                                                                                                                                          |
| Date Submitted by the Author: | 11-Sep-2023                                                                                                                                                                                                                                                                                                                                                                                                                                       |
| Complete List of Authors:     | Yu, Ying; Beijing University of Chinese Medicine, Liu, Cun-Zhi; Beijing University of Chinese Medicine, Department of Acupuncture and Moxibustion<br>Wang, Xue-Zhou; Beijing University of Chinese Medicine, Xi, Ya-Wei; Liangxiang Hospital of Beijing Fangshan District<br>Fu, Yi-Ming; Beijing University of Chinese Medicine<br>Mi, Bao-Hong; Beijing University of Chinese Medicine<br>Tu, Jian-Feng; Beijing University of Chinese Medicine |
| Keywords:                     | COMPLEMENTARY MEDICINE, Protocols & guidelines < HEALTH SERVICES ADMINISTRATION & MANAGEMENT, Musculoskeletal disorders < ORTHOPAEDIC & TRAUMA SURGERY                                                                                                                                                                                                                                                                                            |
|                               |                                                                                                                                                                                                                                                                                                                                                                                                                                                   |

SCHOLARONE™  
Manuscripts

1  
2  
3  
4 **The long-term effect of 4 weeks versus 8 weeks of acupuncture for**  
5  
6 **knee osteoarthritis: protocol for a randomized controlled trial**  
7  
8

9 Ying Yu<sup>1</sup>, Cun-Zhi Liu<sup>1</sup>, Xue-Zhou Wang<sup>1</sup>, Ya-Wei Xi<sup>2</sup>, Yi-Ming Fu<sup>1</sup>, Bao-Hong Mi<sup>1</sup>,  
10  
11 Jian-Feng Tu<sup>1\*</sup>  
12  
13

14 <sup>1</sup> International Acupuncture and Moxibustion Innovation Institute, School of  
15  
16 Acupuncture-Moxibustion and Tuina, Beijing University of Chinese Medicine,  
17  
18 Beijing 100029, China.  
19  
20

21 <sup>2</sup> Acupuncture-Moxibustion Department, Beijing Liangxiang Hospital, Beijing,  
22  
23 China.  
24

25 Correspondence Author:  
26

27 \*Jian-Feng Tu  
28  
29

30 Tel: 00861053912201; Fax: 00861053912201; E-address: [tujianfeng1@126.com](mailto:tujianfeng1@126.com);  
31

32 Address: School of Acupuncture and Moxibustion, Beijing University of Chinese  
33  
34 Medicine. 11 Bei San Huan Dong Lu, Chaoyang District, Beijing, 100029China.  
35  
36

37 Word count: 3468.  
38  
39

40 Number of figures: 2 figures.  
41  
42

43 Number of tables: 4 tables.  
44  
45  
46  
47  
48  
49  
50  
51  
52  
53  
54  
55  
56  
57  
58  
59  
60

## Abstract

**Introduction** Knee osteoarthritis represents the prevalent and incapacitating disease.

Acupuncture, a widely used clinical treatment for knee osteoarthritis, has been shown to ameliorate pain and enhance joint function in affected individuals. However, there is a lack of evidence comparing different courses of acupuncture for knee osteoarthritis. In this trial, we will assess the effect of 4 weeks versus 8 weeks of acupuncture in patients with knee osteoarthritis.

**Methods and analysis** The protocol is a pragmatic, parallel, two-armed randomized controlled trial, with data analyst and assessor being blinded. 148 eligible patients with knee osteoarthritis will be randomly allocated in a 1:1 ratio to receive 4-week or 8-week acupuncture. Electro-acupuncture will be administered 3 times per week for 4 or 8 weeks, respectively. Patients with knee osteoarthritis in both groups will be followed up to 26 weeks. The primary outcome is the response rate at week 26, and secondary outcomes include knee-joint pain, knee-joint function, knee-joint stiffness, quality of life, patient global assessment, the Osteoarthritis Research Society International response rate and rescue medicine. A cost-effectiveness analysis will be carried out over 26 weeks.

**Ethics and dissemination** The study has obtained ethics approval from the Research Ethical Committee of Beijing University of Chinese Medicine (No.2023BZYL0506). The study findings will be disseminated through presentation in a high-impact medical journal, with online access. Additionally, we plan to present them at select conferences and scientific meetings.

1  
2  
3  
4 **Trial registration** The trial has been registered in the Chinese Clinical Trials Registry

5  
6 (ChiCTR2300073383. Register date: July 10, 2023,

7  
8  
9 <https://www.chictr.org.cn/showproj.html?proj=199310>).

10  
11  
12  
13  
14  
15  
16  
17  
18  
19  
20  
21  
22  
23  
24  
25  
26  
27  
28  
29  
30  
31  
32  
33  
34  
35  
36  
37  
38  
39  
40  
41  
42  
43  
44  
45  
46  
47  
48  
49  
50  
51  
52  
53  
54  
55  
56  
57  
58  
59  
60

For peer review only

## Strengths and limitations of this study

1. The research will provide strong clinical evidence of different acupuncture treatment courses on their effect.
2. Strict standardization of endpoints and objective criteria, long-term follow-up, rigorous quality control, and evaluation of patients' expectations for acupuncture are aimed at reducing the risk of bias.
3. The nature of the intervention precludes the possibility of blinding both acupuncturists and patients, which may bring bias.
4. Only patients with KL II or III will be included in this trial and results of the research will not be generalized to patients with KL IV.
5. The trial only compared 2 common treatment courses of acupuncture, 4 weeks and 8 weeks, without any comparison to other courses.

## Background

Osteoarthritis, a degenerative joint disease, is a prevalent affliction among adults globally, with the knee joint being the most commonly affected<sup>1 2</sup>. Estimates published in 2020 suggest that 300 million people worldwide are affected by hip and knee osteoarthritis (KOA)<sup>3</sup>. KOA is characterized by pain and functional limitations, which impairs patients' quality of life seriously<sup>2 4</sup>, with age, gender, obesity, excessive physical activities and previous knee trauma being some of the associated risk factors<sup>1 5</sup>. Of note, female patients are more likely to suffer from KOA compared to males<sup>1 6</sup>. And the incidence of KOA increases with age, making it a major contributor to disability in elderly population<sup>1 6</sup>. The annual sick leave costs due to knee and hip osteoarthritis are about €40 million for the Dutch workforce, and KOA costs approximately twice as much as hip osteoarthritis<sup>7</sup>. KOA reduces the employability of patients and raises the cost of healthcare, which places a heavy financial burden on individuals and society.

Acetaminophen and non-steroidal anti-inflammatory drugs (NSAIDs) are strongly recommended for KOA patients in the guideline<sup>8</sup>. Nonetheless, using acetaminophen alone is not much of a role<sup>9</sup>. Taking into consideration the potential gastrointestinal and cardiovascular side effect, NSAIDs should be used for shortest duration possible<sup>10</sup>. Intra-articular corticosteroid injections may be an effective management strategy for KOA patients, but long-term usage increases the risk of joint deterioration<sup>11 12</sup>. Opioid has limited benefits for KOA and a elevated risk of the gastrointestinal adverse event

1  
2  
3  
4 or somnolence<sup>13-16</sup>. Over 20% of patients had a poor prognosis for knee replacement<sup>17</sup>.

5  
6 Despite this, the demand for this treatment continues to grow on a global scale, and  
7  
8  
9 young people account for an increasing proportion<sup>17</sup>. Opioid abuse and considerable  
10  
11 growth for joint replacement requirements lead to overstretched healthcare systems.  
12  
13  
14 There is an urgent need to develop new treatment options, evaluate the effect of  
15  
16 existing treatments, or optimize current approaches<sup>18</sup>.  
17  
18  
19

20  
21  
22 As an integral component of the long-standing practice of traditional Chinese medicine  
23  
24 spanning over 4000 years, acupuncture has emerged as a safe and low-risk physical  
25  
26 therapy with demonstrated cost-effectiveness<sup>18-21</sup>. Acupuncture is widely used in  
27  
28 clinical practice to treating KOA, resulting in notable improvements in pain and joint  
29  
30 function<sup>18 22</sup>. In light of these findings, the American College of Rheumatology and  
31  
32 American Academy of Orthopaedic Surgeons have conditionally recommended the  
33  
34 implementation of acupuncture on KOA<sup>23 24</sup>. The effect of acupuncture is inherently  
35  
36 intertwined with the treatment course<sup>19</sup>. A cumulative course of treatment is required  
37  
38 to produce and maintain the effect of acupuncture<sup>19</sup>.  
39  
40  
41  
42  
43  
44  
45  
46  
47

48 Currently, there is not enough evidence to make a comparison between different  
49  
50 acupuncture courses on KOA. The 8-week acupuncture courses resulted in pain relief  
51  
52 and improved joint function among KOA patients <sup>25</sup>, which was consistent with our  
53  
54 own previous research<sup>26</sup>. Moreover, the benefits of acupuncture on KOA persisted to  
55  
56 26 weeks<sup>22 26</sup>. A meta-analysis has shown that a minimum of 4-week acupuncture  
57  
58  
59  
60



1  
2  
3  
4 treatment is needed to alleviate symptoms in KOA patients<sup>27</sup>. Additionally, 4-week  
5  
6 acupuncture on KOA has conferred the short-term relief of symptoms<sup>28-32</sup>. A secondary  
7  
8 analysis revealed that short-term effect of acupuncture is better at week 8 than week 4  
9  
10 on KOA, although the growth rate of benefits slowed down with additional treatment  
11  
12 courses<sup>33</sup>. More evidence is required to explain the long-term effect of acupuncture on  
13  
14 KOA between different treatment courses. In order to address this, We conduct a trial to  
15  
16 evaluate the long-term effect of 4 weeks versus 8 weeks of acupuncture on KOA.  
17  
18  
19  
20  
21  
22  
23  
24

## 25 **Methods**

### 26 **Study design**

27  
28  
29 This is a pragmatic, parallel, two-arm randomized controlled research scheduled to take  
30  
31 place at Dongzhimen Hospital and Beijing Liangxiang Hospital from August 2023 to  
32  
33 June 2024. A total of 148 eligible patients will be assigned randomly in a 1:1 ratio to  
34  
35 receive 4-week or 8-week acupuncture. EA treatment will be administered 3 times per  
36  
37 week for 4 or 8 weeks. KOA patients in both groups will be followed up to 26 weeks.  
38  
39  
40 The schedule of the assessments completed by all patients is illustrated in Table 1 and  
41  
42 the research flow diagram is presented in Figure 1. The protocol adheres to the  
43  
44 principles of the Declaration of Helsinki and will be reported in accordance with the  
45  
46 SPIRIT guidelines (additional file 1).  
47  
48  
49  
50  
51  
52  
53  
54  
55  
56  
57  
58  
59  
60

**Table 1** the schedule of assessments

| The assessments           | Baseline | Week 4 | Week 8 | Week 16 | Week 26 |
|---------------------------|----------|--------|--------|---------|---------|
| Response rate             |          | ×      | ×      | ×       | ×       |
| NRS                       | ×        | ×      | ×      | ×       | ×       |
| WOMAC                     | ×        | ×      | ×      | ×       | ×       |
| SF-12                     | ×        | ×      | ×      | ×       | ×       |
| Patient global assessment | ×        | ×      | ×      | ×       | ×       |
| The OARSI response rate   |          | ×      | ×      | ×       | ×       |
| Rescue medicine           |          | ×      | ×      | ×       | ×       |
| Adverse events            |          | ×      | ×      | ×       | ×       |

NRS: numerical rating scale, WOMAC: Western Ontario and McMaster Universities Osteoarthritis Index, SF-12: 12 item Short Form Health Survey, OARSI: Osteoarthritis Research Society International

## Recruitment

Participants will be recruited from individuals diagnosed with KOA based on the American College of Rheumatology (ACR) criteria<sup>34</sup>. Announcements will be distributed through social media (WeChat), outpatient units and print advertisements. Interested patients can contact the clinical research coordinator (CRC) via telephone, e-mail, or WeChat to be enrolled in this research. The CRC will inform the study protocol in detail with them, including the purpose, procedures, time commitment, potential risks and benefits associated with participation in this trial. Following a preliminary screening process for inclusion and exclusion, potential candidates will be invited to undergo a face-to-face screening by CRC. Confidentiality measures will be taken to safeguard patient privacy. Eligible participants will sign the informed consent before randomization.

## Inclusion criteria

- 1
- 2
- 3
- 4 1. Aged 45-75 years (both genders).
- 5
- 6
- 7 2. Diagnosed with KOA according to the ACR criteria.
- 8
- 9
- 10 3. Unilateral/bilateral chronic knee pain for over 3 months.
- 11
- 12 4. Radiologic confirmation of KOA within 6 months (Kellgren–Lawrence grade II or
- 13
- 14 III).
- 15
- 16
- 17 5. The average score for knee pain during walking on flat ground in the last week  $\geq 4$
- 18
- 19 out of 10 on a numerical rating scale (NRS)<sup>35</sup>.
- 20
- 21
- 22 6. Written informed consent.
- 23
- 24
- 25
- 26

### 27 **Exclusion criteria**

- 28
- 29
- 30 1. History of knee surgery or waiting for surgery (knee replacement or arthroscopic
- 31 knee surgery).
- 32
- 33
- 34
- 35 2. Knee pain caused by other diseases (autoimmune diseases, infection, malignant
- 36
- 37 tumours, trauma, fracture, joint loose bodies, severe effusion of joint cavity,
- 38
- 39 lumbosacral vertebrae disease, gout, etc.).
- 40
- 41
- 42
- 43 3. Arthroscopy within 1 year and intra-articular injection in the past 6 months.
- 44
- 45
- 46 4. Acupuncture treatment during the past 6 months.
- 47
- 48
- 49 5. Serious acute or chronic organ diseases or mental disorders.
- 50
- 51
- 52 6. Blood coagulation disorders.
- 53
- 54 7. Pregnancy and breastfeeding.
- 55
- 56 8. Cardiac pacemaker and epilepsy.
- 57
- 58
- 59 9. Participation in another clinical study within 1 month.
- 60

## Randomization

All eligible patients will be randomly allocated to either 4-week group or 8-week group in a 1:1 ratio through a random number sequence, which will be generated by a professional statistician who is not involved in the assessment or treatment of participants using SAS 9.3 software. A central stratified block randomized design with variable block sizes will be used in this trial. The random number sequence and treatment plans will be placed inside corresponding numbered opaque envelopes. After the baseline assessment of eligible participants by CRC, an independent research assistant who is separate from the trial will assign the envelopes to acupuncturists. The acupuncturists will ensure the envelopes are sealed and will open them to determine which intervention should be performed. The CRC will be responsible for enrolling participants, obtaining informed consent and requesting randomization.

## Blinding

The outcome assessor and data analyst will be blinded to group assignments. In consideration of the nature of the intervention, the acupuncturist and patients will not be blinded. The interventions allocated to the patients will remain undisclosed until the completion of the statistical analysis.

## Patient and public involvement

There is no patient or public involvement in study design, recruitment for or conduct of the study.

## Interventions

The acupuncture prescription, derived from clinical practice and a pre-study<sup>26</sup>, comprises 5 essential acupoints and 3 adjunct acupoints. The essential acupoints consist of dubi (ST35), neixiyan (EX-LE5), ququan (LR8), xiyangguan (GB33), and an ash point (the acupoint where the patient reports the most intense pain). The acupuncturist will select appropriate adjunct acupoints based on the patient's lesion types, which has been shown in Table 2. The acupoints are localized according to the World Health Organization Standard Acupuncture Locations and are presented in Table 3 and Figure 2. Licensed acupuncturists are of minimum 5 years' experience in acupuncture. For individuals afflicted with bilateral osteoarthritis, both knees will be subjected to acupuncture needling<sup>25</sup>. Conversely, unilateral osteoarthritis patient only receive acupuncture therapy on the affected knee<sup>25</sup>. Throughout the course of the trial, patients with pain unbearable can obtain Diclofenac Sodium Enteric-coated Tablets (Beijing Novartis Pharma Ag) from the CRC, who will record the use of medication. Diclofenac Sodium Enteric-coated Tablets will be dispensed in sets of 6 tablets, with instructions for patients to ingest one orally three times daily.

**Table 2** The adjunct acupoints

| Meridian syndrome                           | Acupoints                                                                                                                  |
|---------------------------------------------|----------------------------------------------------------------------------------------------------------------------------|
| Foot yangming<br>(anterior side of leg)     | Liangqiu (ST34), zusanli (ST36), futu (ST32), fenglong (ST40), hedong (EL-XE2)                                             |
| Foot shaoyang<br>(lateral side of the leg)  | Fengshi (GB31), waiqiu (GB36), yanglingquan (GB34), xuanzhong (GB39), zulinqi (GB41)                                       |
| Foot taiyang<br>(posterior side of the leg) | Weiyang (BL39), weizhong (BL40), chengshan (BL57), kunlun (BL60)                                                           |
| Foot three-yin<br>(medial side of the leg)  | Xiguan (LR7), yinlingquan (SP9), xuehai (SP10), yingu (KI10), gongsun (SP4), sanyinjiao (SP6), taichong (LR3), taixi (KI3) |

**Table 3** Acupoints manipulation

| Acupoints | Angle                                          | Depth        | Twisting and reinforcing  | De Qi |
|-----------|------------------------------------------------|--------------|---------------------------|-------|
| ST35      | Oblique jab in the inner-up direction          | 0.5-1 inch   | Even reinforcing-reducing | Yes   |
| EX-LE5    | Oblique jab in the external-superior direction | 0.5-1 inch   | Even reinforcing-reducing | Yes   |
| LR8       | Penetrating jab to GB33                        | 1-1.5 inch   | Reducing                  | Yes   |
| GB33      | Penetrating jab to LR8                         | 1-1.5 inch   | Reducing                  | Yes   |
| GB34      | Perpendicular inserting                        | 1-1.5 inch   | Even reinforcing-reducing | Yes   |
| EX-LE2    | Perpendicular inserting                        | 0.8-1 inch   | Even reinforcing-reducing | Yes   |
| ST34      | Perpendicular inserting                        | 1-1.2 inch   | Even reinforcing-reducing | Yes   |
| ST36      | Perpendicular inserting                        | 1-2 inch     | Reinforcing               | Yes   |
| ST40      | Perpendicular inserting                        | 1-1.5 inch   | Reducing                  | Yes   |
| ST32      | Perpendicular inserting                        | 1-2 inch     | Reinforcing               | Yes   |
| GB31      | Perpendicular inserting                        | 1-1.5 inch   | Reinforcing               | Yes   |
| GB36      | Perpendicular inserting                        | 0.5-0.8 inch | Even reinforcing-reducing | Yes   |
| GB39      | Perpendicular inserting                        | 0.5-0.8 inch | Even reinforcing-reducing | Yes   |
| GB41      | Perpendicular inserting                        | 0.5-0.8 inch | Even reinforcing-reducing | Yes   |
| BL39      | Perpendicular inserting                        | 1-1.5 inch   | reducing                  | Yes   |
| BL40      | Perpendicular inserting                        | 1-1.5 inch   | Even reinforcing-reducing | Yes   |
| BL57      | Perpendicular inserting                        | 1.5-2 inch   | Reinforcing               | Yes   |
| BL60      | Perpendicular inserting                        | 0.5-0.8 inch | Even reinforcing-reducing | Yes   |
| KI3       | Perpendicular inserting                        | 0.5-0.8 inch | Reducing                  | Yes   |
| KI10      | Perpendicular inserting                        | 1-1.5 inch   | Even reinforcing-reducing | Yes   |
| SP4       | Perpendicular inserting                        | 0.5-1.2 inch | Reducing                  | Yes   |
| SP6       | Perpendicular inserting                        | 1-1.5 inch   | Reinforcing               | Yes   |
| LR3       | Perpendicular inserting                        | 0.5-0.8 inch | Even reinforcing-reducing | Yes   |
| LR7       | Perpendicular inserting                        | 1-1.5 inch   | Even reinforcing-reducing | Yes   |
| SP9       | Perpendicular inserting                        | 1.5-2 inch   | Reducing                  | Yes   |
| SP10      | Perpendicular inserting                        | 1-2 inch     | Even reinforcing-reducing | Yes   |

Reinforcing: angle  $<90^\circ$ , frequency  $>120$ r/min; Even reinforcing-reducing: angle between  $120^\circ$  and  $180^\circ$ , frequency between 60 and 120r/min; reducing: angle  $>180^\circ$ , frequency  $<60$ r/min

#### 4-week group

Acupuncture treatments will consist of 12 sessions, each lasting 30 minutes, and will be administered 3 times per week over 4 weeks. Single-use aseptic needles (length: 25-40mm, diameter: 0.25mm, Hwato, Suzhou, China) will be used. Before needle

1  
2  
3  
4 insertion, both acupuncturist's hands and acupuncture site will be strictly disinfected  
5  
6 with 75% alcohol. Then acupuncturists will proceed to apply the needles through the  
7  
8 skin, selecting the appropriate acupuncture angle, depth, and manipulation technique  
9  
10 as per Table 3. In order to achieve the sensation of "De Qi" (a composite sensation  
11  
12 characterized by soreness, numbness, distention or heaviness), needles will be  
13  
14 manually stimulated for a duration of 10s. Paired electrodes from an EA apparatus  
15  
16 (HANS-200A acupoint nerve stimulator; Jisheng, Nanjing, China) will be attached to  
17  
18 needle holders at LR 8-GB 33 and 2 adjunct acupoints. The electro-acupuncture  
19  
20 stimulation will be a dilatation wave of 2/100 Hz, depending on the patient's comfort  
21  
22 level.  
23  
24  
25  
26  
27  
28  
29  
30  
31

### 32 **8-week group**

33  
34 Acupuncture treatments will consist of 24 sessions, each lasting 30 minutes, and will  
35  
36 be administered 3 times per week over 8 weeks. All other procedures will remain  
37  
38 consistent with 4-week group. The differences and similarities between two groups are  
39  
40 shown in Supplemental Table 1.  
41  
42  
43  
44  
45  
46  
47

### 48 **Outcomes**

49  
50 If patients with unilateral osteoarthritis, the evaluation of outcomes will pertain  
51  
52 exclusively to that knee. For bilateral osteoarthritis, the knee with worse symptoms at  
53  
54 baseline will be assessed.  
55  
56  
57  
58  
59  
60



## Primary outcome

The primary outcome is the response rate at week 26, which is defined as the proportion of patients achieving a minimal clinically important improvement (MCII)<sup>36</sup>. Specifically, the MCII is a  $\geq 2$ -point improvement on the NRS and a  $\geq 6$ -point improvement on the Western Ontario and McMaster Universities Osteoarthritis Index (WOMAC) function score compared to baseline<sup>36</sup>. An 11-point NRS ranges from ‘absence of pain’ (0) to ‘most intense pain imaginable’ (10). The WOMAC function subscale scored from 0 to 68 will be used to evaluate the mean knee discomfort experienced over the preceding week, with lower scores indicating better functional ability.

## Secondary outcomes

*Response rate at other time points* The response rate will be assessed at weeks 4, 8 and 16.

*Knee-joint pain* The mean pain experienced within the preceding week will be measured using an 11-point NRS and the WOMAC pain subscale at weeks 0, 4, 8, 16 and 26. The WOMAC pain subscale spanning from 0 to 20 comprises 5 items<sup>37</sup>. Higher scores are indicative of increased pain.

*Knee-joint function* The average function of the last 7 days will be measured using the WOMAC function subscale at weeks 0, 4, 8, 16 and 26. The tool spans across a range

1  
2  
3  
4 of 0 to 68, encompassing 17 items. Lower scores on this subscale are indicative of  
5  
6 superior physical function<sup>37</sup>.  
7  
8  
9

10  
11 *Knee-joint stiffness* The mean stiffness throughout the preceding week will be assessed  
12  
13 via the WOMAC stiffness subscale at weeks 0, 4, 8, 16 and 26. The WOMAC stiffness  
14  
15 subscale ranges from 0 to 8, including 2 items, with higher scores indicating increased  
16  
17 stiffness<sup>37</sup>.  
18  
19  
20  
21

22  
23  
24 *Quality of life* The evaluation for the standard of living will be performed at weeks 0,  
25  
26 4, 8, 16 and 26, following the randomization process, by mean of the 12 item Short  
27  
28 Form Health Survey (SF-12)<sup>38</sup>. The SF-12 comprises of both mental and physical  
29  
30 domains, and each domain is calibrated from 0 to 100. Higher scores on the scale  
31  
32 indicate an improved quality of life.  
33  
34  
35  
36  
37  
38  
39

40  
41 *Patient global assessment* The singular item of the patient global assessment concerns  
42  
43 the knee symptoms experienced by participants during the preceding week. Utilizing  
44  
45 the Visual Analogue Scale, which ranges from 0 to 100, the severity of the disease is  
46  
47 positively correlated with the magnitude of the score. This inquiry will be administered  
48  
49 at weeks 0, 4, 8, 16 and 26.  
50  
51  
52  
53

54  
55  
56 *The Osteoarthritis Research Society International (OARSI) response rate* The  
57  
58 proportion of subjects with improvement in pain or function  $\geq 50\%$  and absolute  
59  
60

1  
2  
3  
4 change  $\geq 20$ , or enhancement in a minimum of 2 of the following: pain  $\geq 20\%$  and  
5  
6 absolute change  $\geq 10$ , function  $\geq 20\%$  and absolute change  $\geq 10$ , and patient's global  
7  
8 assessment  $\geq 20\%$  and absolute change  $\geq 10$ <sup>39</sup>. The OARSI response rate will be  
9  
10 assessed at weeks 4, 8, 16 and 26.  
11  
12  
13  
14  
15  
16

17 *Rescue medicine* Any use of Diclofenac Sodium Enteric-coated Tablets will be  
18  
19 quantified at weeks 4, 8, 16 and 26.  
20  
21  
22  
23  
24

## 25 **Safety**

26  
27 For adverse events that occur during the trial, researchers should record the appearance  
28  
29 time, duration, classification, severity, remedial actions taken, remedial process, final  
30  
31 resolution, etc. on the case report form (CRF). Moreover, researchers will assess the  
32  
33 correlation between the intervention and the adverse event, in conjunction with other  
34  
35 potential causative and confounding factors, in a comprehensive manner. In the event  
36  
37 of serious adverse occurrences, researchers should immediately address and report to  
38  
39 the principal investigator. Adverse events comprise subcutaneous hematoma,  
40  
41 unrelenting post-injection pain, pruritus at the needle puncture location, etc. It is  
42  
43 imperative that all adverse events are meticulously tracked until resolution or  
44  
45 stabilization is achieved.  
46  
47  
48  
49  
50  
51  
52  
53  
54  
55

## 56 **Simple size**

57  
58  
59  
60

1  
2  
3  
4 Drawing upon the team's prior research, the anticipated response rates for the 4-week  
5  
6 and 8-week groups are 35% and 60%<sup>26</sup>. The sample size of 59 patients in each group  
7  
8 was calculated to provide 80% power, with a two-tailed  $\alpha$  level of 0.05, utilizing  
9  
10 PASS15.05 software. This requires 74 patients per group allowing for 20% dropout.  
11  
12  
13  
14  
15  
16

### 17 **Statistical analysis**

18  
19 Using IBM SPSS 26.0 software for statistical analysis,  $P < 0.05$  will be deemed  
20  
21 statistically significant. Mean  $\pm$  standard deviation will be utilized to measurement  
22  
23 data, while percentages will be used to enumeration data. All randomized cases will be  
24  
25 included into intention-to-treat analysis, and missing data will be filled in using  
26  
27 multiple imputation. Per protocol analysis will only include the cases that fully  
28  
29 complied with the trial protocol and will be used for the primary outcome as sensitivity  
30  
31 analysis. Measurement data conforming to normal distribution will undergo  $t$ -test  
32  
33 analysis, while measurement data not normal distribution will be subjected to Mann-  
34  
35 Whitney test. Enumeration data will be analyzed via  $\chi^2$  test or Fisher's exact test. 4-  
36  
37 week and 8-week groups will be assessed the cost effectiveness of acupuncture over  
38  
39 26 weeks.  
40  
41  
42  
43  
44  
45  
46  
47  
48  
49

### 50 **Data management**

51  
52 Data collector and entry clerks, data manager, statistician and outcome assessor will  
53  
54 undergo training in data management. At the end of the treatment phase, all participant  
55  
56 data will be completed and recorded on the original CRFs. The data will be entered  
57  
58  
59  
60

1  
2  
3  
4 into Excel spreadsheets by the data entry clerks in time, following which the accuracy  
5  
6 of the 2 datasets will be compared by the data manager. Any discrepancies will be  
7  
8 corrected in accordance with the original CRFs.  
9  
10

11  
12  
13  
14 All paper files related to the research will be preserved, and electronic documents will  
15  
16 be securely stored on a password-protected computer. These research documents,  
17  
18 whether in paper or electronic form, will be retained for a minimum of 5 years  
19  
20 following publication. If readers and reviewers have any questions regarding our  
21  
22 published data, they can contact the corresponding author to request the original data.  
23  
24  
25  
26 Patient private information, including their name and telephone number, will be  
27  
28 safeguarded.  
29  
30  
31  
32  
33  
34

### 35 **Quality control**

36  
37 Patients will be included in strict accordance with diagnosis, inclusion and exclusion  
38  
39 criteria. Standard operating procedures was developed for each aspect of the trial to  
40  
41 ensure uniformity in its implementation and provide a reference in case of  
42  
43 disagreements. Researchers will undergo uniform training that cover the study  
44  
45 objectives, treatment standards, random allocation, acupuncture techniques, and  
46  
47 assessment forms. And they should strictly follow the subject design plan, fill in the  
48  
49 CRF carefully and objectively, and record truthfully all kinds of problems that arise in  
50  
51 the clinical trial. Compliance control will be reinforced by registering participants'  
52  
53 contact information and then making an appointment in advance for them to come to  
54  
55  
56  
57  
58  
59  
60

1  
2  
3  
4 the treatment. The inspector will regularly check the trial records. Any problems  
5  
6 encountered will be reported to the supervisor promptly, and strict measures will be  
7  
8 taken to identify and solve them.  
9  
10

## 11 12 13 14 **Discussion**

15  
16  
17 KOA represents a prevalent and incapacitating disease, constituting a considerable  
18  
19 public health concern. Currently, there is a paucity of evidence comparing diverse  
20  
21 acupuncture courses, with regards to their effect in treating KOA. The research aims  
22  
23 to evaluate the long-term effect of 4 weeks versus 8 weeks of acupuncture on KOA.  
24  
25  
26

27  
28  
29 Our clinical trial incorporates rigorous scientific methodologies and comprehensive  
30  
31 outcome measures to assess treatment response, and we will provide a high-quality  
32  
33 report on the difference in acupuncture treatment effect between 4 and 8 weeks. It is  
34  
35 an innovative and practical approach, and the research will provide strong clinical  
36  
37 evidence of effect of various acupuncture treatment courses. All participants will  
38  
39 receive acupuncture treatment throughout the trial, without a placebo control group,  
40  
41 which will promote their compliance. During the trial, various researchers will be  
42  
43 responsible for the generation, concealment and allocation of the random number  
44  
45 sequence, patients' recruitment, acupuncture treatment and outcome measure  
46  
47 assessment. Such a division of labor will ensure that randomization is fully maintained,  
48  
49 thus controlling for selection bias and confounding bias to ensure comparability  
50  
51 between two groups.  
52  
53  
54  
55  
56  
57  
58  
59  
60

1  
2  
3  
4 There are, however, 3 limitations to this trial. Firstly, the nature of the intervention  
5  
6 precludes the possibility of blinding both acupuncturists and patients. But data analysts  
7  
8 and outcome assessors will be blinded, and acupuncturists will receive training on how  
9  
10 to minimize bias by interacting less with patients. Secondly, only patients with KL II  
11  
12 or III will be included in this trial and results of the research will not be generalized to  
13  
14 patients with KL IV, who might require longer treatment courses. Thirdly, the trial  
15  
16 only compared two common treatment courses of acupuncture, 4 weeks and 8 weeks,  
17  
18 without any comparison to other courses.  
19  
20  
21  
22  
23  
24  
25  
26

27 In conclusion, these findings will enhance the high-quality evidence on the effect of  
28  
29 different acupuncture treatment courses. Furthermore, this research will provide  
30  
31 invaluable insights for developing effective and practical treatment plans for KOA  
32  
33 patients. It will help make medical decisions, improve health insurance reimbursement  
34  
35 programs, and ensure efficient allocation of precious healthcare resources.  
36  
37  
38  
39  
40  
41  
42

### 43 **Trial status**

44  
45 This trial is currently recruiting participants.  
46  
47

### 48 **Acknowledgements**

49  
50 We appreciate the researchers and institutions who will collaborate in this study, as  
51  
52 well as all participants who will cooperate with our research.  
53  
54  
55  
56  
57

### 58 **Funding**

1  
2  
3  
4 This research is supported by The National Science Fund for Distinguished Young  
5  
6 Scholars (No.81825024) and The National Natural Science Foundation of China (No.  
7  
8 82104693).  
9  
10

### 11 12 13 **Authors' contributions**

14  
15 J-FT conceived the research. J-FT and YY initiated the research design. YY, J-FT, and  
16  
17 C-ZL drafted and critically revised the manuscript for important intellectual content.  
18  
19 C-ZL sought funding and ethical approval. All authors contributed to the refinement  
20  
21 of the research protocol and approved the final manuscript.  
22  
23  
24  
25  
26  
27  
28

### 29 **Ethics declarations**

30  
31 The study has obtained ethics approval from the Research Ethical Committee of  
32  
33 Beijing University of Chinese Medicine (No.2023BZYL0506). It has been registered  
34  
35 on Chinese Clinical Trials Registry (No.ChiCTR2300073383). The participants will  
36  
37 be made aware that their information and data will be kept anonymous and  
38  
39 confidential. They can make the decision to withdraw from the trial at any time. All  
40  
41 information will be encrypted and only the designated researcher will access to it.  
42  
43  
44  
45  
46

### 47 **Competing interests**

48  
49 The authors declare that they have no competing interests.  
50  
51

### 52 **References**

- 53  
54  
55  
56 1. Katz JN, Arant KR, Loeser RF. Diagnosis and Treatment of Hip and Knee Osteoarthritis:  
57  
58 A Review. *JAMA* 2021;325(6):568-78. doi: 10.1001/jama.2020.22171  
59  
60



- 1  
2  
3  
4 2. Hunter DJ, Bierma-Zeinstra S. Osteoarthritis. *Lancet* 2019;393(10182):1745-59. doi:  
5  
6 10.1016/S0140-6736(19)30417-9  
7  
8
- 9 3. Safiri S, Kolahi AA, Smith E, et al. Global, regional and national burden of osteoarthritis  
10  
11 1990-2017: a systematic analysis of the Global Burden of Disease Study 2017. *Ann*  
12  
13 *Rheum Dis* 2020;79(6):819-28. doi: 10.1136/annrheumdis-2019-216515  
14  
15
- 16 4. Chen AT, Shrestha S, Collins JE, et al. Estimating contextual effect in nonpharmacological  
17  
18 therapies for pain in knee osteoarthritis: a systematic analytic review. *Osteoarthritis*  
19  
20 *Cartilage* 2020;28(9):1154-69. doi: 10.1016/j.joca.2020.05.007  
21  
22
- 23 5. Silverwood V, Blagojevic-Bucknall M, Jinks C, et al. Current evidence on risk factors for  
24  
25 knee osteoarthritis in older adults: a systematic review and meta-analysis. *Osteoarthritis*  
26  
27 *Cartilage* 2015;23(4):507-15. doi: 10.1016/j.joca.2014.11.019  
28  
29
- 30 6. Cross M, Smith E, Hoy D, et al. The global burden of hip and knee osteoarthritis: estimates  
31  
32 from the global burden of disease 2010 study. *Ann Rheum Dis* 2014;73(7):1323-30. doi:  
33  
34 10.1136/annrheumdis-2013-204763  
35  
36
- 37 7. Hardenberg M, Spekle EM, Coenen P, et al. The economic burden of knee and hip  
38  
39 osteoarthritis: absenteeism and costs in the Dutch workforce. *BMC Musculoskelet Disord*  
40  
41 2022;23(1):364. doi: 10.1186/s12891-022-05306-9  
42  
43
- 44 8. Nelson AE, Allen KD, Golightly YM, et al. A systematic review of recommendations and  
45  
46 guidelines for the management of osteoarthritis: The chronic osteoarthritis management  
47  
48 initiative of the U.S. bone and joint initiative. *Semin Arthritis Rheum* 2014;43(6):701-12.  
49  
50  
51  
52  
53  
54  
55  
56  
57  
58  
59  
60  
doi: 10.1016/j.semarthrit.2013.11.012
9. da Costa BR, Reichenbach S, Keller N, et al. Effectiveness of non-steroidal anti-

- 1  
2  
3  
4 inflammatory drugs for the treatment of pain in knee and hip osteoarthritis: a network meta-  
5  
6 analysis. *Lancet* 2017;390(10090):e21-e33. doi: 10.1016/S0140-6736(17)31744-0  
7  
8  
9 10. da Costa BR, Reichenbach S, Keller N, et al. RETRACTED: Effectiveness of non-steroidal  
10  
11 anti-inflammatory drugs for the treatment of pain in knee and hip osteoarthritis: a network  
12  
13 meta-analysis. *Lancet* 2016;387(10033):2093-105. doi: 10.1016/S0140-6736(16)30002-2  
14  
15  
16  
17 11. Juni P, Hari R, Rutjes AW, et al. Intra-articular corticosteroid for knee osteoarthritis.  
18  
19 *Cochrane Database Syst Rev* 2015;2015(10):CD005328. doi:  
20  
21 10.1002/14651858.CD005328.pub3  
22  
23  
24  
25 12. Orchard JW. Is there a place for intra-articular corticosteroid injections in the treatment of  
26  
27 knee osteoarthritis? *BMJ* 2020;368:l6923. doi: 10.1136/bmj.l6923  
28  
29  
30 13. Cepeda MS, Camargo F, Zea C, et al. Tramadol for osteoarthritis: a systematic review  
31  
32 and metaanalysis. *J Rheumatol* 2007;34(3):543-55  
33  
34  
35 14. da Costa BR, Nuesch E, Kasteler R, et al. Oral or transdermal opioids for osteoarthritis of  
36  
37 the knee or hip. *Cochrane Database Syst Rev* 2014(9):CD003115. doi:  
38  
39 10.1002/14651858.CD003115.pub4  
40  
41  
42  
43 15. da Costa BR, Pereira TV, Saadat P, et al. Effectiveness and safety of non-steroidal anti-  
44  
45 inflammatory drugs and opioid treatment for knee and hip osteoarthritis: network meta-  
46  
47 analysis. *BMJ* 2021;375:n2321. doi: 10.1136/bmj.n2321  
48  
49  
50 16. Osani MC, Lohmander LS, Bannuru RR. Is There Any Role for Opioids in the Management  
51  
52 of Knee and Hip Osteoarthritis? A Systematic Review and Meta-Analysis. *Arthritis Care*  
53  
54 *Res (Hoboken)* 2021;73(10):1413-24. doi: 10.1002/acr.24363 [published Online First:  
55  
56 2020/06/26]  
57  
58  
59  
60

- 1  
2  
3  
4 17. Price AJ, Alvand A, Troelsen A, et al. Knee replacement. *Lancet* 2018;392(10158):1672-  
5  
6 82. doi: 10.1016/S0140-6736(18)32344-4  
7  
8  
9 18. Hunter DJ, Harris RE. Acupuncture and Knee Osteoarthritis: Does Dose Matter? *Arthritis*  
10  
11 *Rheumatol* 2021;73(3):371-73. doi: 10.1002/art.41583 [published Online First: 2020/11/11]  
12  
13  
14 19. Chon TY, Lee MC. Acupuncture. *Mayo Clin Proc* 2013;88(10):1141-6. doi:  
15  
16 10.1016/j.mayocp.2013.06.009  
17  
18  
19 20. Witt CM, Reinhold T, Jena S, et al. Cost-effectiveness of acupuncture treatment in patients  
20  
21 with headache. *Cephalalgia* 2008;28(4):334-45. doi: 10.1111/j.1468-2982.2007.01504.x  
22  
23  
24 21. MacPherson H, Thomas K, Walters S, et al. The York acupuncture safety study:  
25  
26 prospective survey of 34 000 treatments by traditional acupuncturists. *BMJ*  
27  
28 2001;323(7311):486-7. doi: 10.1136/bmj.323.7311.486  
29  
30  
31 22. Vickers AJ, Vertosick EA, Lewith G, et al. Acupuncture for Chronic Pain: Update of an  
32  
33 Individual Patient Data Meta-Analysis. *J Pain* 2018;19(5):455-74. doi:  
34  
35 10.1016/j.jpain.2017.11.005  
36  
37  
38 23. Kolasinski SL, Neogi T, Hochberg MC, et al. 2019 American College of  
39  
40 Rheumatology/Arthritis Foundation Guideline for the Management of Osteoarthritis of the  
41  
42 Hand, Hip, and Knee. *Arthritis Rheumatol* 2020;72(2):220-33. doi: 10.1002/art.41142  
43  
44  
45 24. Brophy RH, Fillingham YA. AAOS Clinical Practice Guideline Summary: Management of  
46  
47 Osteoarthritis of the Knee (Nonarthroplasty), Third Edition. *J Am Acad Orthop Surg*  
48  
49 2022;30(9):e721-e29. doi: 10.5435/JAAOS-D-21-01233  
50  
51  
52 25. Witt C, Brinkhaus B, Jena S, et al. Acupuncture in patients with osteoarthritis of the knee:  
53  
54 a randomised trial. *Lancet* 2005;366(9480):136-43. doi: 10.1016/S0140-6736(05)66871-7  
55  
56  
57  
58  
59  
60

- 1  
2  
3  
4 26. Tu JF, Yang JW, Shi GX, et al. Efficacy of Intensive Acupuncture Versus Sham  
5  
6 Acupuncture in Knee Osteoarthritis: A Randomized Controlled Trial. *Arthritis Rheumatol*  
7  
8  
9 2021;73(3):448-58. doi: 10.1002/art.41584  
10  
11  
12 27. Chen N, Wang J, Mucelli A, et al. Electro-Acupuncture is Beneficial for Knee Osteoarthritis:  
13  
14 The Evidence from Meta-Analysis of Randomized Controlled Trials. *Am J Chin Med*  
15  
16 2017;45(5):965-85. doi: 10.1142/S0192415X17500513  
17  
18  
19 28. Chen Y, Jia YJ, Lu JH, et al. [Comparison of therapertic effect of different acupuncture  
20  
21 methods for knee osteoarthritis]. *Zhen Ci Yan Jiu* 2020;45(7):569-73. doi:  
22  
23 10.13702/j.1000-0607.191015  
24  
25  
26  
27 29. Bao F, Zhang Y, Wu ZH, et al. [Efficacy observation on knee osteoarthritis treated with  
28  
29 electroacupuncture and its influence on articular cartilage with T2 mapping]. *Zhongguo*  
30  
31 *Zhen Jiu* 2013;33(3):193-7  
32  
33  
34  
35 30. Sangdee C, Teekachunhatean S, Sananpanich K, et al. Electroacupuncture versus  
36  
37 diclofenac in symptomatic treatment of osteoarthritis of the knee: a randomized controlled  
38  
39 trial. *BMC Complement Altern Med* 2002;2:3. doi: 10.1186/1472-6882-2-3  
40  
41  
42  
43 31. Huang DE, Qin Y, Lin MN, et al. [Clinical efficacy of different waves of electroacupuncture  
44  
45 on knee osteoarthritis and its effect on TGF-beta1 in joint fluid]. *Zhongguo Zhen Jiu*  
46  
47 2020;40(4):370-4. doi: 10.13703/j.0255-2930.20190422-0005  
48  
49  
50  
51 32. Lu N, Cheng P, Xia JX, et al. [Effect of acupuncture combined with moxibustion on serum  
52  
53 matrix metalloproteinase-9 and matrix metalloproteinase inhibitor-1 in patients with knee  
54  
55 osteoarthritis]. *Zhen Ci Yan Jiu* 2022;47(3):262-7. doi: 10.10372/j.1000-0607.20210079  
56  
57  
58  
59 33. Yu Y KS, Tu JF, et al Influence of intervention period on the effect of acupuncture in knee  
60

1  
2  
3  
4 osteoarthritis: a secondary analysis of a multi-center randomized controlled trial. *World J*  
5  
6 *Acupunct Moxibustion* 2023 in press  
7  
8

- 9  
10 34. Hochberg MC, Altman RD, Brandt KD, et al. Guidelines for the medical management of  
11  
12 osteoarthritis. Part II. Osteoarthritis of the knee. American College of Rheumatology.  
13  
14 *Arthritis Rheum* 1995;38(11):1541-6. doi: 10.1002/art.1780381104  
15  
16  
17 35. Jensen MP, Karoly P, Braver S. The measurement of clinical pain intensity: a comparison  
18  
19 of six methods. *Pain* 1986;27(1):117-26. doi: 10.1016/0304-3959(86)90228-9  
20  
21  
22 36. Tubach F, Ravaud P, Baron G, et al. Evaluation of clinically relevant changes in patient  
23  
24 reported outcomes in knee and hip osteoarthritis: the minimal clinically important  
25  
26 improvement. *Ann Rheum Dis* 2005;64(1):29-33. doi: 10.1136/ard.2004.022905  
27  
28  
29  
30 37. Bellamy N, Buchanan WW, Goldsmith CH, et al. Validation study of WOMAC: a health  
31  
32 status instrument for measuring clinically important patient relevant outcomes to  
33  
34 antirheumatic drug therapy in patients with osteoarthritis of the hip or knee. *J Rheumatol*  
35  
36 1988;15(12):1833-40  
37  
38  
39  
40 38. Ware J, Jr., Kosinski M, Keller SD. A 12-Item Short-Form Health Survey: construction of  
41  
42 scales and preliminary tests of reliability and validity. *Med Care* 1996;34(3):220-33. doi:  
43  
44 10.1097/00005650-199603000-00003  
45  
46  
47  
48 39. Pham T, Van Der Heijde D, Lassere M, et al. Outcome variables for osteoarthritis clinical  
49  
50 trials: The OMERACT-OARSI set of responder criteria. *J Rheumatol* 2003;30(7):1648-54  
51  
52

### 53 **Figure legends**

54  
55  
56 Figure 1 The flow diagram of the trial

57  
58 KOA: knee osteoarthritis  
59  
60

1  
2  
3  
4 Figure 2 Meridian acupoints chart  
5

6 Red points: obligatory acupoints; blue points: foot yangming meridian syndrome;  
7  
8 purple points: foot shaoyang meridian syndrome; yellow points: foot taiyang meridian  
9  
10 syndrome; green points: foot three-yin meridian syndrome  
11  
12  
13  
14  
15  
16  
17  
18  
19  
20  
21  
22  
23  
24  
25  
26  
27  
28  
29  
30  
31  
32  
33  
34  
35  
36  
37  
38  
39  
40  
41  
42  
43  
44  
45  
46  
47  
48  
49  
50  
51  
52  
53  
54  
55  
56  
57  
58  
59  
60

For peer review only

1  
2  
3  
4  
5  
6  
7  
8  
9  
10  
11  
12  
13  
14  
15  
16  
17  
18  
19  
20  
21  
22  
23  
24  
25  
26  
27  
28  
29  
30  
31  
32  
33  
34  
35  
36  
37  
38  
39  
40  
41  
42  
43  
44  
45  
46  
47  
48  
49  
50  
51  
52  
53  
54  
55  
56  
57  
58  
59  
60

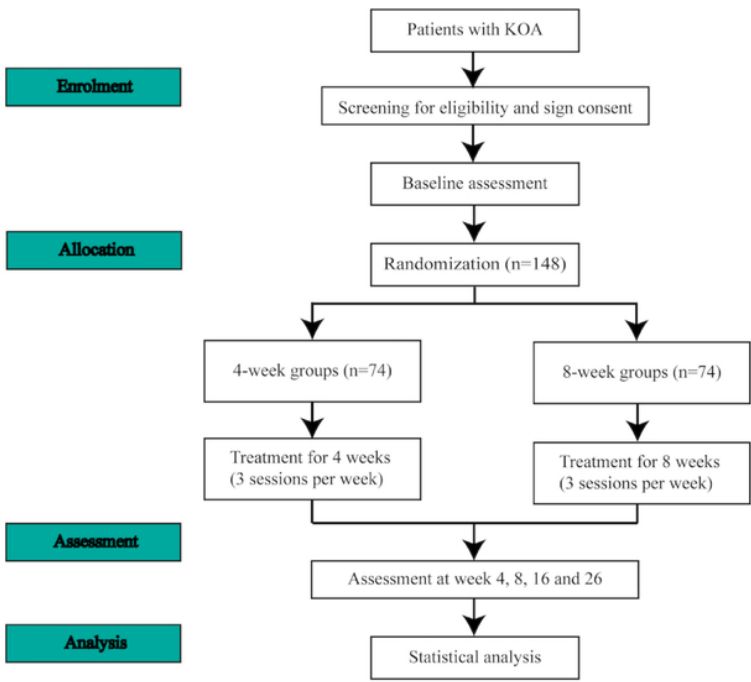

KOA: knee osteoarthritis

34x25mm (600 x 600 DPI)

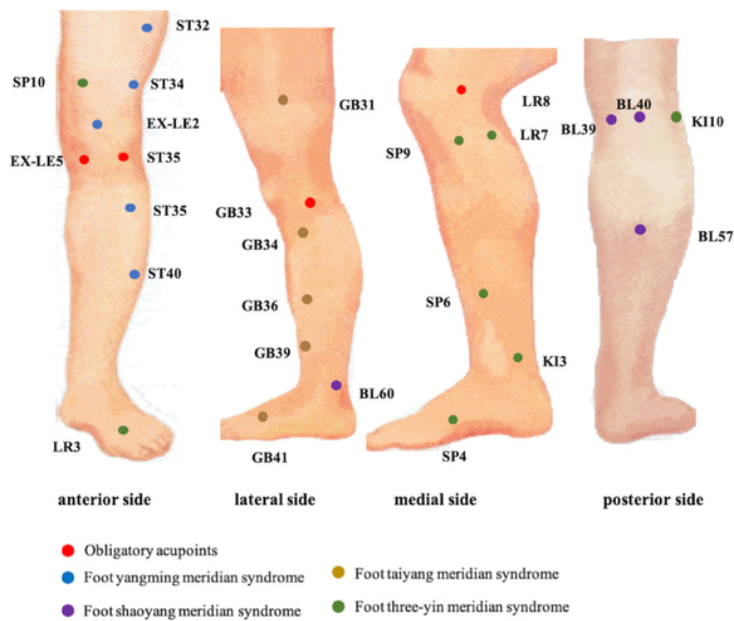

Red points: obligatory acupoints; blue points: foot yangming meridian syndrome; purple points: foot shaoyang meridian syndrome; yellow points: foot taiyang meridian syndrome; green points: foot three-yin meridian syndrome

33x20mm (600 x 600 DPI)



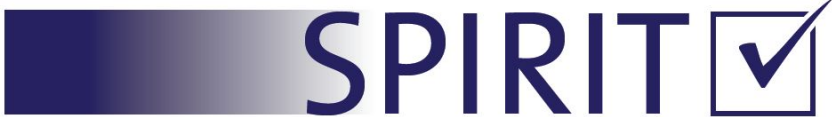

STANDARD PROTOCOL ITEMS: RECOMMENDATIONS FOR INTERVENTIONAL TRIALS

**SPIRIT 2013 Checklist: Recommended items to address in a clinical trial protocol and related documents\***

| Section/item                      | Item No | Description                                                                                                                                                                                                                                                                              | Page   |
|-----------------------------------|---------|------------------------------------------------------------------------------------------------------------------------------------------------------------------------------------------------------------------------------------------------------------------------------------------|--------|
| <b>Administrative information</b> |         |                                                                                                                                                                                                                                                                                          |        |
| Title                             | 1       | Descriptive title identifying the study design, population, interventions, and, if applicable, trial acronym                                                                                                                                                                             | 1      |
| Trial registration                | 2a      | Trial identifier and registry name. If not yet registered, name of intended registry                                                                                                                                                                                                     | 3      |
|                                   | 2b      | All items from the World Health Organization Trial Registration Data Set                                                                                                                                                                                                                 | 5-16   |
| Protocol version                  | 3       | Date and version identifier                                                                                                                                                                                                                                                              | 3      |
| Funding                           | 4       | Sources and types of financial, material, and other support                                                                                                                                                                                                                              | 20     |
| Roles and responsibilities        | 5a      | Names, affiliations, and roles of protocol contributors                                                                                                                                                                                                                                  | 1-2,21 |
|                                   | 5b      | Name and contact information for the trial sponsor                                                                                                                                                                                                                                       | 20     |
|                                   | 5c      | Role of study sponsor and funders, if any, in study design; collection, management, analysis, and interpretation of data; writing of the report; and the decision to submit the report for publication, including whether they will have ultimate authority over any of these activities | 20     |
|                                   | 5d      | Composition, roles, and responsibilities of the coordinating centre, steering committee, endpoint adjudication committee, data management team, and other individuals or groups overseeing the trial, if applicable (see Item 21a for data monitoring committee)                         | 15-16  |

**SPIRIT 2013 Checklist: Recommended items to address in a clinical trial protocol and related documents\*(continued)**

| Section/item                                                                                                              | Item No | Description                                                                                                                                                                                               | Page           |
|---------------------------------------------------------------------------------------------------------------------------|---------|-----------------------------------------------------------------------------------------------------------------------------------------------------------------------------------------------------------|----------------|
| <b>Introduction</b>                                                                                                       |         |                                                                                                                                                                                                           |                |
| Background and rationale                                                                                                  | 6a      | Description of research question and justification for undertaking the trial, including summary of relevant studies (published and unpublished) examining benefits and harms for each intervention        | 5-6            |
|                                                                                                                           | 6b      | Explanation for choice of comparators                                                                                                                                                                     | 5-6,18         |
| Objectives                                                                                                                | 7       | Specific objectives or hypotheses                                                                                                                                                                         | 6              |
| Trial design                                                                                                              | 8       | Description of trial design including type of trial (eg, parallel group, crossover, factorial, single group), allocation ratio, and framework (eg, superiority, equivalence, noninferiority, exploratory) | 6-7            |
| <b>Methods: Participants, interventions, and outcomes</b>                                                                 |         |                                                                                                                                                                                                           |                |
| Study setting                                                                                                             | 9       | Description of study settings (eg, community clinic, academic hospital) and list of countries where data will be collected. Reference to where list of study sites can be obtained                        | 7              |
| Eligibility criteria                                                                                                      | 10      | Inclusion and exclusion criteria for participants. If applicable, eligibility criteria for study centres and individuals who will perform the interventions (eg, surgeons, psychotherapists)              | 7-8            |
| Interventions                                                                                                             | 11a     | Interventions for each group with sufficient detail to allow replication, including how and when they will be administered                                                                                | 9-12           |
|                                                                                                                           | 11b     | Criteria for discontinuing or modifying allocated interventions for a given trial participant (eg, drug dose change in response to harms, participant request, or improving/worsening disease)            | Not applicable |
| <b>SPIRIT 2013 Checklist: Recommended items to address in a clinical trial protocol and related documents*(continued)</b> |         |                                                                                                                                                                                                           |                |

| Section/item         | Item No | Description                                                                                                                                                                                                                                                                                                                                                                    | Page                   |
|----------------------|---------|--------------------------------------------------------------------------------------------------------------------------------------------------------------------------------------------------------------------------------------------------------------------------------------------------------------------------------------------------------------------------------|------------------------|
|                      | 11c     | Strategies to improve adherence to intervention protocols, and any procedures for monitoring adherence (eg, drug tablet return, laboratory tests)                                                                                                                                                                                                                              | 9                      |
|                      | 11d     | Relevant concomitant care and interventions that are permitted or prohibited during the trial                                                                                                                                                                                                                                                                                  | 9                      |
| Outcomes             | 12      | Primary, secondary, and other outcomes, including the specific measurement variable (eg, systolic blood pressure), analysis metric (eg, change from baseline, final value, time to event), method of aggregation (eg, median, proportion), and time point for each outcome. Explanation of the clinical relevance of chosen efficacy and harm outcomes is strongly recommended | 12-15                  |
| Participant timeline | 13      | Time schedule of enrolment, interventions (including any run-ins and washouts), assessments, and visits for participants. A schematic diagram is highly recommended (see Figure)                                                                                                                                                                                               | 6-7, Figure 1, Table 4 |
| Sample size          | 14      | Estimated number of participants needed to achieve study objectives and how it was determined, including clinical and statistical assumptions supporting any sample size calculations                                                                                                                                                                                          | 16-17                  |
| Recruitment          | 15      | Strategies for achieving adequate participant enrolment to reach target sample size                                                                                                                                                                                                                                                                                            | 7                      |

### Methods: Assignment of interventions (for controlled trials)

#### Allocation:

|                     |     |                                                                                                                                                                                                                                                                                                                                                          |     |
|---------------------|-----|----------------------------------------------------------------------------------------------------------------------------------------------------------------------------------------------------------------------------------------------------------------------------------------------------------------------------------------------------------|-----|
| Sequence generation | 16a | Method of generating the allocation sequence (eg, computer-generated random numbers), and list of any factors for stratification. To reduce predictability of a random sequence, details of any planned restriction (eg, blocking) should be provided in a separate document that is unavailable to those who enrol participants or assign interventions | 8-9 |
|---------------------|-----|----------------------------------------------------------------------------------------------------------------------------------------------------------------------------------------------------------------------------------------------------------------------------------------------------------------------------------------------------------|-----|

### SPIRIT 2013 Checklist: Recommended items to address in a clinical trial protocol and related documents\*(continued)

| Section/item                                              | Item No | Description                                                                                                                                                                                                                                                                                                                                                                                                  | Page  |
|-----------------------------------------------------------|---------|--------------------------------------------------------------------------------------------------------------------------------------------------------------------------------------------------------------------------------------------------------------------------------------------------------------------------------------------------------------------------------------------------------------|-------|
| Allocation concealment mechanism                          | 16b     | Mechanism of implementing the allocation sequence (eg, central telephone; sequentially numbered, opaque, sealed envelopes), describing any steps to conceal the sequence until interventions are assigned                                                                                                                                                                                                    | 8-9   |
| Implementation                                            | 16c     | Who will generate the allocation sequence, who will enrol participants, and who will assign participants to interventions                                                                                                                                                                                                                                                                                    | 8-9   |
| Blinding (masking)                                        | 17a     | Who will be blinded after assignment to interventions (eg, trial participants, care providers, outcome assessors, data analysts), and how                                                                                                                                                                                                                                                                    | 9     |
|                                                           | 17b     | If blinded, circumstances under which unblinding is permissible, and procedure for revealing a participant's allocated intervention during the trial                                                                                                                                                                                                                                                         | 9     |
| <b>Methods: Data collection, management, and analysis</b> |         |                                                                                                                                                                                                                                                                                                                                                                                                              |       |
| Data collection methods                                   | 18a     | Plans for assessment and collection of outcome, baseline, and other trial data, including any related processes to promote data quality (eg, duplicate measurements, training of assessors) and a description of study instruments (eg, questionnaires, laboratory tests) along with their reliability and validity, if known. Reference to where data collection forms can be found, if not in the protocol | 15-16 |
|                                                           | 18b     | Plans to promote participant retention and complete follow-up, including list of any outcome data to be collected for participants who discontinue or deviate from intervention protocols                                                                                                                                                                                                                    | 15-16 |
| Data management                                           | 19      | Plans for data entry, coding, security, and storage, including any related processes to promote data quality (eg, double data entry; range checks for data values). Reference to where details of data management procedures can be found, if not in the protocol                                                                                                                                            | 15-16 |
| Statistical methods                                       | 20a     | Statistical methods for analysing primary and secondary outcomes. Reference to where other details of the statistical analysis plan can be found, if not in the protocol                                                                                                                                                                                                                                     | 17-18 |

**SPIRIT 2013 Checklist: Recommended items to address in a clinical trial protocol and related documents\*(continued)**

1  
2  
3  
4  
5  
6  
7  
8  
9  
10  
11  
12  
13  
14  
15  
16  
17  
18  
19  
20  
21  
22  
23  
24  
25  
26  
27  
28  
29  
30  
31  
32  
33  
34  
35  
36  
37  
38  
39  
40  
41  
42  
43  
44  
45  
46

| Section/item                    | Item No | Description                                                                                                                                                                                                                                                                                                                           | Page           |
|---------------------------------|---------|---------------------------------------------------------------------------------------------------------------------------------------------------------------------------------------------------------------------------------------------------------------------------------------------------------------------------------------|----------------|
|                                 | 20b     | Methods for any additional analyses (eg, subgroup and adjusted analyses)                                                                                                                                                                                                                                                              | 17-18          |
|                                 | 20c     | Definition of analysis population relating to protocol non-adherence (eg, as randomised analysis), and any statistical methods to handle missing data (eg, multiple imputation)                                                                                                                                                       | 17-18          |
| <b>Methods: Monitoring</b>      |         |                                                                                                                                                                                                                                                                                                                                       |                |
| Data monitoring                 | 21a     | Composition of data monitoring committee (DMC); summary of its role and reporting structure; statement of whether it is independent from the sponsor and competing interests; and reference to where further details about its charter can be found, if not in the protocol. Alternatively, an explanation of why a DMC is not needed | 16             |
|                                 | 21b     | Description of any interim analyses and stopping guidelines, including who will have access to these interim results and make the final decision to terminate the trial                                                                                                                                                               | Not applicable |
| Harms                           | 22      | Plans for collecting, assessing, reporting, and managing solicited and spontaneously reported adverse events and other unintended effects of trial interventions or trial conduct                                                                                                                                                     | 15             |
| Auditing                        | 23      | Frequency and procedures for auditing trial conduct, if any, and whether the process will be independent from investigators and the sponsor                                                                                                                                                                                           | 15-16          |
| <b>Ethics and dissemination</b> |         |                                                                                                                                                                                                                                                                                                                                       |                |
| Research ethics approval        | 24      | Plans for seeking research ethics committee/institutional review board (REC/IRB) approval                                                                                                                                                                                                                                             | 21             |
| Protocol amendments             | 25      | Plans for communicating important protocol modifications (eg, changes to eligibility criteria, outcomes, analyses) to relevant parties (eg, investigators, REC/IRBs, trial participants, trial registries, journals, regulators)                                                                                                      | Not applicable |

**SPIRIT 2013 Checklist: Recommended items to address in a clinical trial protocol and related documents\*(continued)**

| Section/item                  | Item No | Description                                                                                                                                                                                                                                                                         | Page           |
|-------------------------------|---------|-------------------------------------------------------------------------------------------------------------------------------------------------------------------------------------------------------------------------------------------------------------------------------------|----------------|
| Consent or assent             | 26a     | Who will obtain informed consent or assent from potential trial participants or authorised surrogates, and how (see Item 32)                                                                                                                                                        | 7              |
|                               | 26b     | Additional consent provisions for collection and use of participant data and biological specimens in ancillary studies, if applicable                                                                                                                                               | Not applicable |
| Confidentiality               | 27      | How personal information about potential and enrolled participants will be collected, shared, and maintained in order to protect confidentiality before, during, and after the trial                                                                                                | 15             |
| Declaration of interests      | 28      | Financial and other competing interests for principal investigators for the overall trial and each study site                                                                                                                                                                       | 21-22          |
| Access to data                | 29      | Statement of who will have access to the final trial dataset, and disclosure of contractual agreements that limit such access for investigators                                                                                                                                     | 20-21          |
| Ancillary and post-trial care | 30      | Provisions, if any, for ancillary and post-trial care, and for compensation to those who suffer harm from trial participation                                                                                                                                                       | Not applicable |
| Dissemination policy          | 31a     | Plans for investigators and sponsor to communicate trial results to participants, healthcare professionals, the public, and other relevant groups (eg, via publication, reporting in results databases, or other data sharing arrangements), including any publication restrictions | 20-21          |
|                               | 31b     | Authorship eligibility guidelines and any intended use of professional writers                                                                                                                                                                                                      | 20-21          |
|                               | 31c     | Plans, if any, for granting public access to the full protocol, participant-level dataset, and statistical code                                                                                                                                                                     | Not applicable |

**SPIRIT 2013 Checklist: Recommended items to address in a clinical trial protocol and related documents\*(continued)**

1  
2  
3  
4  
5  
6  
7  
8  
9  
10  
11  
12  
13  
14  
15  
16  
17  
18  
19  
20  
21  
22  
23  
24  
25  
26  
27  
28  
29  
30  
31  
32  
33  
34  
35  
36  
37  
38  
39  
40  
41  
42  
43  
44  
45  
46

---

| Section/item               | Item No | Description                                                                                                                                                                                    | Page                   |
|----------------------------|---------|------------------------------------------------------------------------------------------------------------------------------------------------------------------------------------------------|------------------------|
| <b>Appendices</b>          |         |                                                                                                                                                                                                |                        |
| Informed consent materials | 32      | Model consent form and other related documentation given to participants and authorised surrogates                                                                                             | supplement<br>ary file |
| Biological specimens       | 33      | Plans for collection, laboratory evaluation, and storage of biological specimens for genetic or molecular analysis in the current trial and for future use in ancillary studies, if applicable | Not<br>applicable      |

---

\*It is strongly recommended that this checklist be read in conjunction with the SPIRIT 2013 Explanation & Elaboration for important clarification on the items. Amendments to the protocol should be tracked and dated. The SPIRIT checklist is copyrighted by the SPIRIT Group under the Creative Commons "[Attribution-NonCommercial-NoDerivs 3.0 Unported](https://creativecommons.org/licenses/by-nc-nd/3.0/)" license.

review only

**Supplemental Table 1 Differences and similarities for 4-week group and 8-week group**

|                | 4-week group                                  | 8-week group                                  |
|----------------|-----------------------------------------------|-----------------------------------------------|
| Course         | 4 weeks                                       | 8 weeks                                       |
| Session        | 12 sessions                                   | 24 sessions                                   |
| Frequency      | 3 times per week                              | 3 times per week                              |
| Duration       | 30 minutes each                               | 30 minutes each                               |
| Acupoint       | 5 essential acupoints and 3 adjunct acupoints | 5 essential acupoints and 3 adjunct acupoints |
| EA stimulation | a dilatation wave of 2/100 Hz                 | a dilatation wave of 2/100 Hz                 |

For peer review only



# BMJ Open

## Effect of 4 weeks versus 8 weeks of acupuncture for knee osteoarthritis in China: protocol for a randomized controlled trial

|                                 |                                                                                                                                                                                                                                                                                                                                                                                                                                                   |
|---------------------------------|---------------------------------------------------------------------------------------------------------------------------------------------------------------------------------------------------------------------------------------------------------------------------------------------------------------------------------------------------------------------------------------------------------------------------------------------------|
| Journal:                        | <i>BMJ Open</i>                                                                                                                                                                                                                                                                                                                                                                                                                                   |
| Manuscript ID                   | bmjopen-2023-079709.R1                                                                                                                                                                                                                                                                                                                                                                                                                            |
| Article Type:                   | Protocol                                                                                                                                                                                                                                                                                                                                                                                                                                          |
| Date Submitted by the Author:   | 08-Nov-2023                                                                                                                                                                                                                                                                                                                                                                                                                                       |
| Complete List of Authors:       | Yu, Ying; Beijing University of Chinese Medicine, Liu, Cun-Zhi; Beijing University of Chinese Medicine, Department of Acupuncture and Moxibustion<br>Wang, Xue-Zhou; Beijing University of Chinese Medicine, Xi, Ya-Wei; Liangxiang Hospital of Beijing Fangshan District<br>Fu, Yi-Ming; Beijing University of Chinese Medicine<br>Mi, Bao-Hong; Beijing University of Chinese Medicine<br>Tu, Jian-Feng; Beijing University of Chinese Medicine |
| <b>Primary Subject Heading</b>: | Complementary medicine                                                                                                                                                                                                                                                                                                                                                                                                                            |
| Secondary Subject Heading:      | Rehabilitation medicine, Rheumatology                                                                                                                                                                                                                                                                                                                                                                                                             |
| Keywords:                       | COMPLEMENTARY MEDICINE, Protocols & guidelines < HEALTH SERVICES ADMINISTRATION & MANAGEMENT, Musculoskeletal disorders < ORTHOPAEDIC & TRAUMA SURGERY                                                                                                                                                                                                                                                                                            |
|                                 |                                                                                                                                                                                                                                                                                                                                                                                                                                                   |

SCHOLARONE™  
Manuscripts

1  
2  
3  
4 **Effect of 4 weeks versus 8 weeks of acupuncture for knee**  
5  
6 **osteoarthritis in China: protocol for a randomized controlled trial**  
7  
8

9 Ying Yu<sup>1</sup>, Cun-Zhi Liu<sup>1</sup>, Xue-Zhou Wang<sup>1</sup>, Ya-Wei Xi<sup>2</sup>, Yi-Ming Fu<sup>1</sup>, Bao-Hong Mi<sup>1</sup>,  
10  
11 Jian-Feng Tu<sup>1\*</sup>  
12  
13

14 <sup>1</sup> International Acupuncture and Moxibustion Innovation Institute, School of  
15  
16 Acupuncture-Moxibustion and Tuina, Beijing University of Chinese Medicine,  
17  
18 Beijing 100029, China.  
19

20  
21 <sup>2</sup> Acupuncture-Moxibustion Department, Beijing Liangxiang Hospital, Beijing,  
22  
23 China.  
24

25 Correspondence Author:  
26

27 \*Jian-Feng Tu  
28  
29

30 Tel: 00861053912201; Fax: 00861053912201; E-address: [tujianfeng1@126.com](mailto:tujianfeng1@126.com);  
31

32 Address: School of Acupuncture and Moxibustion, Beijing University of Chinese  
33  
34 Medicine. 11 Bei San Huan Dong Lu, Chaoyang District, Beijing, 100029China.  
35  
36

37  
38 Word count: 3455.  
39

40  
41 Number of figures: 3 Figures.  
42

43  
44 Number of tables: 3 Tables.  
45  
46  
47  
48  
49  
50  
51  
52  
53  
54  
55  
56  
57  
58  
59  
60

## Abstract

**Introduction** Knee osteoarthritis represents the prevalent and incapacitating disease.

Acupuncture, a widely used clinical treatment for knee osteoarthritis, has been shown to ameliorate pain and enhance joint function in affected individuals. However, there is a lack of evidence comparing different courses of acupuncture for knee osteoarthritis. In this trial, we will assess the effect of 4 weeks versus 8 weeks of acupuncture in patients with knee osteoarthritis.

**Methods and analysis** The protocol is a pragmatic, parallel, two-armed randomized controlled trial, with data analyst and assessor being blinded. 148 eligible patients with knee osteoarthritis will be randomly allocated in a 1:1 ratio to receive 4-week or 8-week acupuncture. Electro-acupuncture will be administered 3 times per week for 4 or 8 weeks, respectively. Patients with knee osteoarthritis in both groups will be followed up to 26 weeks. The primary outcome is the response rate at week 26, and secondary outcomes include knee-joint pain, knee-joint function, knee-joint stiffness, quality of life, patient global assessment, the Osteoarthritis Research Society International response rate and rescue medicine. A cost-effectiveness analysis will be carried out over 26 weeks.

**Ethics and dissemination** The protocol has been approved by the Medical Ethical Committee of Beijing University of Chinese Medicine (2023BZYL0506). The study findings will be disseminated through presentation in a medical journal. Additionally, we plan to present them at select conferences and scientific meetings.

1  
2  
3  
4  
5  
6  
7  
8  
9  
10  
11  
12  
13  
14  
15  
16  
17  
18  
19  
20  
21  
22  
23  
24  
25  
26  
27  
28  
29  
30  
31  
32  
33  
34  
35  
36  
37  
38  
39  
40  
41  
42  
43  
44  
45  
46  
47  
48  
49  
50  
51  
52  
53  
54  
55  
56  
57  
58  
59  
60

**Trial registration** The trial has been registered in the Chinese Clinical Trials Registry

(ChiCTR2300073383. Register date: July 10, 2023,

<https://www.chictr.org.cn/showproj.html?proj=199310>).

For peer review only

## Strengths and limitations of this study

1. Different courses of acupuncture for KOA will be head-to-head compared in this randomized controlled trial.
2. During the trial, various researchers will be responsible for the generation of the random number sequence, allocation concealment, patients' recruitment, acupuncture treatment and outcome measure assessment to control bias.
3. Cost effectiveness of acupuncture will be assessed over 26 weeks in both 4-week and 8-week groups.
4. The nature of the intervention precludes the possibility of blinding both acupuncturists and patients, which may bring bias.
5. The trial only compared 2 common treatment courses of acupuncture, 4 weeks and 8 weeks, without any comparison to other courses.

## Background

Osteoarthritis, a degenerative joint disease, is a prevalent affliction among adults globally, with the knee joint being the most commonly affected<sup>1 2</sup>. Estimates published in 2020 suggest that 300 million people worldwide are affected by hip and knee osteoarthritis (KOA)<sup>3</sup>. KOA is characterized by pain and functional limitations, which impairs patients' quality of life seriously<sup>2 4</sup>, with age, gender, obesity, excessive physical activities and previous knee trauma being some of the associated risk factors<sup>1 5</sup>. Of note, female patients are more likely to suffer from KOA compared to males<sup>1 6</sup>. And the incidence of KOA increases with age, making it a major contributor to disability in elderly population<sup>1 6</sup>. The annual sick leave costs due to knee and hip osteoarthritis are about €40 million for the Dutch workforce, and KOA costs approximately twice as much as hip osteoarthritis<sup>7</sup>. KOA reduces the employability of patients and raises the cost of healthcare, which places a heavy financial burden on individuals and society.

Exercise therapy and weight loss have been shown to be effective in KOA<sup>1</sup>, but sustained maintenance of these methods persists as a challenge<sup>2</sup> due to depending heavily on patient compliance<sup>1</sup>. Acetaminophen and non-steroidal anti-inflammatory drugs (NSAIDs) are strongly recommended for KOA patients in the guideline<sup>8</sup>. Nonetheless, using acetaminophen alone is not much of a role<sup>9</sup>. Taking into consideration the potential gastrointestinal and cardiovascular side effect, NSAIDs should be used for shortest duration possible<sup>10</sup>. Intra-articular corticosteroid injections

1  
2  
3  
4 may be an effective management strategy for KOA patients, but prolonged usage  
5  
6 increases the risk of joint deterioration<sup>11 12</sup>. Opioid has limited benefits for KOA and a  
7  
8 elevated risk of the gastrointestinal adverse event or somnolence<sup>13-16</sup>. Over 20% of  
9  
10 patients had a poor prognosis for knee replacement<sup>17</sup>. Despite this, the demand for this  
11  
12 treatment continues to grow on a global scale, and young people account for an  
13  
14 increasing proportion<sup>17</sup>. Opioid abuse and considerable growth for joint replacement  
15  
16 requirements lead to overstretched healthcare systems. Urgent research is required to  
17  
18 to develop new treatment options, evaluate the effect of existing treatments, or enhance  
19  
20 current approaches<sup>21</sup>.  
21  
22  
23  
24  
25  
26  
27  
28  
29

30 As an integral component of the long-standing practice of traditional Chinese medicine  
31  
32 spanning over 4000 years, acupuncture has emerged as a safe and low-risk physical  
33  
34 therapy with demonstrated cost-effectiveness<sup>21-24</sup>. Acupuncture is widely used in  
35  
36 clinical practice to treating KOA, resulting in notable improvements in pain and joint  
37  
38 function<sup>21 25 26</sup>. In light of these findings, the American College of Rheumatology and  
39  
40 American Academy of Orthopaedic Surgeons have conditionally recommended the  
41  
42 implementation of acupuncture on KOA<sup>20 27</sup>. The effect of acupuncture is inherently  
43  
44 intertwined with the treatment course<sup>22 28</sup>. A cumulative course of treatment is required  
45  
46 to produce and maintain the effect of acupuncture<sup>22</sup>.  
47  
48  
49  
50  
51  
52  
53  
54  
55

56 Currently, there is a paucity of evidence about head-to-head comparison of diverse  
57  
58 acupuncture courses, with regards to their effect in treating KOA. The 8-week  
59  
60

1  
2  
3  
4 acupuncture courses resulted in pain relief and improved joint function among KOA  
5  
6 patients<sup>29</sup>, which was consistent with our own previous research<sup>30</sup>. A meta-analysis  
7  
8  
9 has shown that a minimum of 4-week acupuncture treatment is needed to alleviate  
10  
11 symptoms in KOA patients<sup>31</sup>. Additionally, other studies also have shown that 4-week  
12  
13 acupuncture for KOA can conferred the relief patients' pain and dysfunction<sup>32-36</sup>. 4–8  
14  
15 weeks of acupuncture for KOA is recommended by the latest clinical practice  
16  
17 guideline<sup>37</sup>. However, it is unclear which course of acupuncture is more effective, 8  
18  
19 weeks or 4 weeks for KOA<sup>38</sup>. More evidence is required to explain the effect of  
20  
21 acupuncture on KOA between different treatment courses. In order to address this, we  
22  
23 conduct a trial to evaluate the effect of 4 weeks versus 8 weeks of acupuncture on  
24  
25  
26  
27  
28  
29  
30  
31  
32  
33  
34  
35  
36  
37  
38  
39  
40  
41  
42  
43  
44  
45  
46  
47  
48  
49  
50  
51  
52  
53  
54  
55  
56  
57  
58  
59  
60  
KOA.

## Methods

### Study design

This is a pragmatic, parallel, two-arm randomized controlled research scheduled to take place at Dongzhimen Hospital and Beijing Liangxiang Hospital from August 2023 to June 2024. A total of 148 eligible patients will be assigned randomly in a 1:1 ratio to receive 4-week or 8-week acupuncture. Electro-acupuncture (EA) treatment will be administered 3 times per week for 4 or 8 weeks. KOA patients in both groups will be followed up to 26 weeks. The schedule of the assessments completed by all patients is illustrated in Figure 1 and the research flow diagram is presented in Figure 2. The



1  
2  
3  
4 protocol adheres to the principles of the Declaration of Helsinki and will be reported  
5  
6 in accordance with the SPIRIT guidelines (additional file 1)<sup>39</sup>.  
7  
8  
9

## 10 11 **Recruitment**

12  
13  
14 Participants will be recruited from individuals diagnosed with KOA based on the  
15  
16 American College of Rheumatology (ACR) criteria<sup>40</sup>. Announcements will be  
17  
18 distributed through social media (WeChat), outpatient units and print advertisements.  
19  
20 Interested patients can contact the clinical research coordinator (CRC) via telephone,  
21  
22 e-mail, or WeChat to be enrolled in this research. The CRC will inform the study  
23  
24 protocol in detail with them, including the purpose, procedures, time commitment,  
25  
26 potential risks and benefits associated with participation in this trial. Following a  
27  
28 preliminary screening process for inclusion and exclusion, potential candidates will be  
29  
30 invited to undergo a face-to-face screening by CRC, who will advise patients to  
31  
32 maintain their existing lifestyle. Confidentiality measures will be taken to safeguard  
33  
34 patient privacy. Eligible participants will sign the informed consent before  
35  
36 randomization.  
37  
38  
39  
40  
41  
42  
43  
44  
45  
46  
47

## 48 **Inclusion criteria**

- 49  
50 1. Aged 45-75 years (both genders).
- 51  
52 2. Diagnosed with KOA according to the ACR criteria.
- 53  
54 3. Unilateral/bilateral chronic knee pain for over 3 months.
- 55  
56  
57  
58  
59  
60

1  
2  
3  
4 4. Radiologic confirmation of KOA within 6 months (Kellgren–Lawrence grade II or  
5  
6 III).

7  
8  
9 5. The average score for knee pain during walking on flat ground in the last week  $\geq 4$   
10  
11 out of 10 on a numerical rating scale (NRS)<sup>41</sup>.

12  
13  
14 6. Written informed consent.  
15  
16

### 17 18 19 **Exclusion criteria**

20  
21  
22 1. History of knee surgery or waiting for surgery (knee replacement or arthroscopic  
23  
24 knee surgery).

25  
26  
27 2. Knee pain caused by other diseases (autoimmune diseases, infection, malignant  
28  
29 tumours, trauma, fracture, joint loose bodies, severe effusion of joint cavity,  
30  
31 lumbosacral vertebrae disease, gout, etc.).

32  
33  
34 3. Arthroscopy within 1 year and intra-articular injection in the past 6 months.  
35

36  
37 4. Acupuncture treatment during the past 6 months.  
38

39  
40 5. Serious acute or chronic organ diseases or mental disorders.  
41

42  
43 6. Blood coagulation disorders.  
44

45  
46 7. Pregnancy and breastfeeding.  
47

48  
49 8. Cardiac pacemaker and epilepsy.  
50

51  
52 9. Participation in another clinical study within 1 month.  
53  
54  
55

### 56 **Randomization**

57  
58  
59  
60

1  
2  
3  
4 All eligible patients will be randomly allocated to either 4-week group or 8-week group  
5 in a 1:1 ratio through a random number sequence, which will be generated by a  
6 professional statistician who is not involved in the assessment or treatment of  
7 participants using SAS 9.3 software. This trial will use stratified block randomisation,  
8 stratified by centre, with variable block length. The random number sequence and  
9 treatment plans will be placed inside corresponding numbered opaque envelopes. After  
10 the baseline assessment of eligible participants by CRC, an independent research  
11 assistant who is separate from the trial will assign the envelopes to acupuncturists. The  
12 acupuncturists will ensure the envelopes are sealed and will open them to determine  
13 which intervention should be performed. The CRC will be responsible for enrolling  
14 participants, obtaining informed consent and requesting randomization.  
15  
16  
17  
18  
19  
20  
21  
22  
23  
24  
25  
26  
27

### 28 **Blinding**

29  
30 In consideration of the nature of the intervention, the acupuncturist and patients will  
31 not be blinded. The outcome assessor and data analyst will be blinded to group  
32 assignments. The allocation will remain undisclosed to outcome assessor and data  
33 analyst until the completion of the statistical analysis.  
34  
35  
36  
37  
38  
39  
40  
41  
42  
43

### 44 **Patient and public involvement**

45  
46 There is no patient or public involvement in study design, recruitment for or conduct  
47 of the study.  
48  
49  
50  
51  
52  
53

### 54 **Interventions**

55  
56 The acupuncture prescription, derived from clinical practice and a pre-study<sup>30</sup>,  
57 comprises 5 essential acupoints and 3 adjunct acupoints. The essential acupoints  
58  
59  
60

consist of dubi (ST35), neixiyan (EX-LE5), ququan (LR8), xiyangguan (GB33), and an ash point (the acupoint where the patient reports the most intense pain). The acupuncturist will select appropriate adjunct acupoints based on the patient's lesion types, which has been shown in Table 1. The acupoints are localized according to the World Health Organization Standard Acupuncture Locations and are presented in Table 2 and Figure 3. Licensed acupuncturists are of minimum 5 years' experience in acupuncture. For individuals afflicted with bilateral osteoarthritis, both knees will be subjected to acupuncture needling<sup>29</sup>. Conversely, unilateral osteoarthritis patient only receive acupuncture therapy on the affected knee<sup>29</sup>. Throughout the course of the trial, patients with pain unbearable can obtain Diclofenac Sodium Enteric-coated Tablets (Beijing Novartis Pharma Ag) from the CRC, who will record the use of medication. Diclofenac Sodium Enteric-coated Tablets will be dispensed in sets of 6 tablets, 25 mg per tablet, with instructions for patients to ingest one orally three times daily.

**Table 1** The adjunct acupoints

| Meridian syndrome                           | Acupoints                                                                                                                  |
|---------------------------------------------|----------------------------------------------------------------------------------------------------------------------------|
| Foot yangming<br>(anterior side of leg)     | Liangqiu (ST34), zusanli (ST36), futu (ST32), fenglong (ST40), heding (EL-XE2)                                             |
| Foot shaoyang<br>(lateral side of the leg)  | Fengshi (GB31), waiqiu (GB36), yanglingquan (GB34), xuanzhong (GB39), zulinqi (GB41)                                       |
| Foot taiyang<br>(posterior side of the leg) | Weiyang (BL39), weizhong (BL40), chengshan (BL57), kunlun (BL60)                                                           |
| Foot three-yin<br>(medial side of the leg)  | Xiguan (LR7), yinlingquan (SP9), xuehai (SP10), yingu (KI10), gongsun (SP4), sanyinjiao (SP6), taichong (LR3), taixi (KI3) |

**Table 2** Acupoints manipulation

| Acupoints | Angle                                          | Depth        | Twisting and reinforcing  | De Qi |
|-----------|------------------------------------------------|--------------|---------------------------|-------|
| ST35      | Oblique jab in the inner-up direction          | 0.5-1 inch   | Even reinforcing-reducing | Yes   |
| EX-LE5    | Oblique jab in the external-superior direction | 0.5-1 inch   | Even reinforcing-reducing | Yes   |
| LR8       | Penetrating jab to GB33                        | 1-1.5 inch   | Reducing                  | Yes   |
| GB33      | Penetrating jab to LR8                         | 1-1.5 inch   | Reducing                  | Yes   |
| GB34      | Perpendicular inserting                        | 1-1.5 inch   | Even reinforcing-reducing | Yes   |
| EX-LE2    | Perpendicular inserting                        | 0.8-1 inch   | Even reinforcing-reducing | Yes   |
| ST34      | Perpendicular inserting                        | 1-1.2 inch   | Even reinforcing-reducing | Yes   |
| ST36      | Perpendicular inserting                        | 1-2 inch     | Reinforcing               | Yes   |
| ST40      | Perpendicular inserting                        | 1-1.5 inch   | Reducing                  | Yes   |
| ST32      | Perpendicular inserting                        | 1-2 inch     | Reinforcing               | Yes   |
| GB31      | Perpendicular inserting                        | 1-1.5 inch   | Reinforcing               | Yes   |
| GB36      | Perpendicular inserting                        | 0.5-0.8 inch | Even reinforcing-reducing | Yes   |
| GB39      | Perpendicular inserting                        | 0.5-0.8 inch | Even reinforcing-reducing | Yes   |
| GB41      | Perpendicular inserting                        | 0.5-0.8 inch | Even reinforcing-reducing | Yes   |
| BL39      | Perpendicular inserting                        | 1-1.5 inch   | reducing                  | Yes   |
| BL40      | Perpendicular inserting                        | 1-1.5 inch   | Even reinforcing-reducing | Yes   |
| BL57      | Perpendicular inserting                        | 1.5-2 inch   | Reinforcing               | Yes   |
| BL60      | Perpendicular inserting                        | 0.5-0.8 inch | Even reinforcing-reducing | Yes   |
| KI3       | Perpendicular inserting                        | 0.5-0.8 inch | Reducing                  | Yes   |
| KI10      | Perpendicular inserting                        | 1-1.5 inch   | Even reinforcing-reducing | Yes   |
| SP4       | Perpendicular inserting                        | 0.5-1.2 inch | Reducing                  | Yes   |
| SP6       | Perpendicular inserting                        | 1-1.5 inch   | Reinforcing               | Yes   |
| LR3       | Perpendicular inserting                        | 0.5-0.8 inch | Even reinforcing-reducing | Yes   |
| LR7       | Perpendicular inserting                        | 1-1.5 inch   | Even reinforcing-reducing | Yes   |
| SP9       | Perpendicular inserting                        | 1.5-2 inch   | Reducing                  | Yes   |
| SP10      | Perpendicular inserting                        | 1-2 inch     | Even reinforcing-reducing | Yes   |

Reinforcing: angle  $<90^\circ$ , frequency  $>120\text{r/min}$ ; Even reinforcing-reducing: angle between  $120^\circ$  and  $180^\circ$ , frequency between 60 and  $120\text{r/min}$ ; reducing: angle  $>180^\circ$ , frequency  $<60\text{r/min}$

#### 4-week group

1  
2  
3  
4 Acupuncture treatments will consist of 12 sessions, each lasting 30 minutes, and will  
5  
6 be administered 3 times per week over 4 weeks. Single-use aseptic needles (length: 25-  
7  
8 40mm, diameter: 0.25mm, Hwato, Suzhou, China) will be used. Before needle  
9  
10 insertion, both acupuncturist's hands and acupuncture site will be strictly disinfected  
11  
12 with 75% alcohol. Then acupuncturists will proceed to apply the needles through the  
13  
14 skin, selecting the appropriate acupuncture angle, depth, and manipulation technique  
15  
16 as per Table 2. In order to achieve the sensation of "De Qi" (a composite sensation  
17  
18 characterized by soreness, numbness, distention or heaviness), needles will be  
19  
20 manually stimulated for a duration of 10s. Paired electrodes from an EA apparatus  
21  
22 (HANS-200A acupoint nerve stimulator; Jisheng, Nanjing, China) will be attached to  
23  
24 needle holders at LR 8-GB 33 and 2 adjunct acupoints. The electro-acupuncture  
25  
26 stimulation will be a dilatation wave of 2/100 Hz, depending on the patient's comfort  
27  
28 level.  
29  
30  
31  
32  
33  
34  
35  
36  
37  
38  
39

#### 40 **8-week group**

41  
42 Acupuncture treatments will consist of 24 sessions, each lasting 30 minutes, and will  
43  
44 be administered 3 times per week over 8 weeks. All other procedures will remain  
45  
46 consistent with 4-week group. The differences and similarities between two groups are  
47  
48 shown in Supplemental Table 1.  
49  
50  
51  
52  
53  
54  
55

#### 56 **Outcomes**

57  
58  
59  
60

1  
2  
3  
4 If patients with unilateral osteoarthritis, the evaluation of outcomes will pertain  
5  
6 exclusively to that knee. For bilateral osteoarthritis, the knee with worse symptoms at  
7  
8 baseline will be assessed.  
9  
10

### 11 12 13 14 **Primary outcome**

15  
16  
17 The primary outcome is the response rate at week 26, which is defined as the proportion  
18  
19 of patients achieving a minimal clinically important improvement (MCII)<sup>42</sup>.  
20  
21 Specifically, the MCII is a  $\geq 2$ -point improvement on the NRS and a  $\geq 6$ -point  
22  
23 improvement on the Western Ontario and McMaster Universities Osteoarthritis Index  
24  
25 (WOMAC) function score compared to baseline<sup>42</sup>. An 11-point NRS ranges from  
26  
27 ‘absence of pain’ (0) to ‘most intense pain imaginable’ (10). The WOMAC function  
28  
29 subscale scored from 0 to 68 will be used to evaluate the mean knee discomfort  
30  
31 experienced over the preceding week, with lower scores indicating better functional  
32  
33 ability.  
34  
35  
36  
37  
38  
39  
40  
41  
42

### 43 **Secondary outcomes**

44  
45 *Response rate at other time points* The response rate will be assessed at weeks 4, 8 and  
46  
47  
48 16.  
49  
50

51  
52  
53 *Knee-joint pain* The mean pain experienced within the preceding week will be  
54  
55 measured using an 11-point NRS and the WOMAC pain subscale at weeks 0, 4, 8, 16  
56  
57  
58  
59  
60

1  
2  
3  
4 and 26. The WOMAC pain subscale spanning from 0 to 20 comprises 5 items<sup>43</sup>. Higher  
5  
6 scores are indicative of increased pain.  
7  
8  
9

10  
11 *Knee-joint function* The average function of the last 7 days will be measured using the  
12  
13 WOMAC function subscale at weeks 0, 4, 8, 16 and 26. The tool spans across a range  
14  
15 of 0 to 68, encompassing 17 items. Lower scores on this subscale are indicative of  
16  
17 superior physical function<sup>43</sup>.  
18  
19  
20  
21  
22  
23

24  
25 *Knee-joint stiffness* The mean stiffness throughout the preceding week will be assessed  
26  
27 via the WOMAC stiffness subscale at weeks 0, 4, 8, 16 and 26. The WOMAC stiffness  
28  
29 subscale ranges from 0 to 8, including 2 items, with higher scores indicating increased  
30  
31 stiffness<sup>43</sup>.  
32  
33  
34  
35  
36  
37

38  
39 *Quality of life* The evaluation for the standard of living will be performed at weeks 0,  
40  
41 4, 8, 16 and 26, following the randomization process, by mean of the 12 item Short  
42  
43 Form Health Survey (SF-12)<sup>44</sup>. The SF-12 comprises of both mental and physical  
44  
45 domains, and each domain is calibrated from 0 to 100. Higher scores on the scale  
46  
47 indicate an improved quality of life.  
48  
49  
50  
51  
52

53  
54 *Patient global assessment* The singular item of the patient global assessment concerns  
55  
56 the knee symptoms experienced by participants during the preceding week. Utilizing  
57  
58 the Visual Analogue Scale, which ranges from 0 to 100, the severity of the disease is  
59  
60



1  
2  
3  
4 positively correlated with the magnitude of the score. This inquiry will be administered  
5  
6 at weeks 0, 4, 8, 16 and 26.  
7  
8  
9

10  
11 *The Osteoarthritis Research Society International (OARSI) response rate* The  
12 proportion of subjects with improvement in pain or function  $\geq 50\%$  and absolute  
13 change  $\geq 20$ , or enhancement in a minimum of 2 of the following: pain  $\geq 20\%$  and  
14 absolute change  $\geq 10$ , function  $\geq 20\%$  and absolute change  $\geq 10$ , and patient's global  
15 assessment  $\geq 20\%$  and absolute change  $\geq 10$ <sup>45</sup>. The OARSI response rate will be  
16 assessed at weeks 4, 8, 16 and 26.  
17  
18  
19  
20  
21  
22  
23  
24  
25  
26  
27  
28  
29

30 *Rescue medicine* Any use of Diclofenac Sodium Enteric-coated Tablets will be  
31 quantified at weeks 4, 8, 16 and 26.  
32  
33  
34  
35  
36  
37

### 38 **Safety**

39  
40 For adverse events that occur during the trial, researchers should record the appearance  
41 time, duration, classification, severity, remedial actions taken, remedial process, final  
42 resolution, etc. on the case report form (CRF). Moreover, researchers will assess the  
43 correlation between the intervention and the adverse event, in conjunction with other  
44 potential causative and confounding factors, in a comprehensive manner. In the event  
45 of serious adverse occurrences, researchers should immediately address and report to  
46 the principal investigator. Adverse events comprise subcutaneous hematoma,  
47 unrelenting post-injection pain, pruritus at the needle puncture location, etc. It is  
48  
49  
50  
51  
52  
53  
54  
55  
56  
57  
58  
59  
60

1  
2  
3  
4 imperative that all adverse events are meticulously tracked until resolution or  
5  
6 stabilization is achieved.  
7  
8  
9

### 10 11 **Simple size**

12  
13  
14 Drawing upon the team's prior research, the anticipated response rates for the 4-week  
15  
16 and 8-week groups are 35% and 60%<sup>30</sup>. The sample size of 59 patients in each group  
17  
18 was calculated to provide 80% power, with a two-tailed  $\alpha$  level of 0.05, utilizing  
19  
20 PASS15.05 software. This requires 74 patients per group allowing for 20% dropout.  
21  
22  
23  
24  
25  
26

### 27 **Data analysis**

28  
29  
30 Using IBM SPSS 26.0 software for statistical analysis,  $P < 0.05$  will be deemed  
31  
32 statistically significant. Measurement data will be tested for normality. For those  
33  
34 conforming to a normal distribution, the mean and standard deviation will be  
35  
36 calculated. For those that do not, median (interquartile range) will be calculated. And  
37  
38 percentages will be used to enumeration data. All randomized cases will be included  
39  
40 into intention-to-treat analysis, and missing data will be filled in using multiple  
41  
42 imputation. Per protocol analysis will only include the cases that fully complied with  
43  
44 the trial protocol and will be used for the primary outcome as sensitivity analysis. If  
45  
46 measurement data conforms to a normal distribution, it will undergo  $t$ -test analysis.  
47  
48 While it does not conform to normal distribution, it will be subjected to Mann-Whitney  
49  
50 test. Enumeration data will be analyzed via  $\chi^2$  test or Fisher's exact test. NRS and  
51  
52 WOMAC scores at multiple time points will be compared using a mixed-effects model  
53  
54  
55  
56  
57  
58  
59  
60

1  
2  
3  
4 with repeated measure as sensitivity analysis. Subgroup analysis will be used for  
5  
6 potential confounders such as age, gender and weight, and affected knee. Cost  
7  
8 effectiveness of acupuncture will be assessed over 26 weeks in both 4-week and 8-  
9  
10 week groups.  
11  
12  
13  
14  
15  
16

### 17 **Data management**

18  
19 Data collector and entry clerks, data manager, statistician and outcome assessor will  
20  
21 undergo training in data management. At the end of the treatment phase, all participant  
22  
23 data will be completed and recorded on the original CRFs. The data will be entered  
24  
25 into Excel spreadsheets by the data entry clerks in time, following which the accuracy  
26  
27 of the 2 datasets will be compared by the data manager. Any discrepancies will be  
28  
29 corrected in accordance with the original CRFs.  
30  
31  
32  
33  
34  
35  
36  
37

38 All paper files related to the research will be preserved, and electronic documents will  
39  
40 be securely stored on a password-protected computer. These research documents,  
41  
42 whether in paper or electronic form, will be retained for a minimum of 5 years  
43  
44 following publication. If readers and reviewers have any questions regarding our  
45  
46 published data, they can contact the corresponding author to request the original data.  
47  
48 Patient private information, including their name and telephone number, will be  
49  
50 safeguarded. The trial has a low risk of safety and is not designed for interim analyses.  
51  
52  
53  
54  
55  
56 Therefore, Data Monitoring Committee will not be established.  
57  
58  
59  
60

## Quality control

Patients will be included in strict accordance with diagnosis, inclusion and exclusion criteria. Standard operating procedures was developed for each aspect of the trial to ensure uniformity in its implementation and provide a reference in case of disagreements. Researchers will undergo uniform training that cover the study objectives, treatment standards, random allocation, acupuncture techniques, and assessment forms. And they should strictly follow the subject design plan, fill in the CRF carefully and objectively, and record truthfully all kinds of problems that arise in the clinical trial. Compliance control will be reinforced by registering participants' contact information and then making an appointment in advance for them to come to the treatment. The inspector will regularly check the trial records. Any problems encountered will be reported to the supervisor promptly, and strict measures will be taken to identify and solve them. During the trial, various researchers will be responsible for the generation of the random number sequence, allocation concealment, patients' recruitment, acupuncture treatment and outcome measure assessment to control bias.

## Ethics and dissemination

This protocol has been approved by the Medicial Ethical Committee of Beijing University of Chinese Medicine (2023BZYL0506) and registered on Chinese Clinical Trials Registry (ChiCTR2300073383). The participants' information will be kept anonymous and confidential. They can make the decision to withdraw from the trial at any time. All information will be encrypted and only the designated researcher can access to it. The study findings will be disseminated through presentation in a medical journal. Additionally, we plan to present them at select conferences and scientific meetings.

## Synthesis

Our clinical trial incorporates rigorous scientific methodologies and comprehensive outcome measures to assess treatment response, and we will provide a high-quality report on the difference in acupuncture treatment effect between 4 and 8 weeks. It is an innovative and practical approach, and the research will provide strong clinical evidence of effect of various acupuncture treatment courses. All participants will receive acupuncture treatment throughout the trial, without a placebo control group, which will promote their compliance.

These findings will enhance the high-quality evidence on the effect of different acupuncture treatment courses. Furthermore, this research will provide invaluable insights for developing effective and practical treatment plans for KOA patients. It will help make medical decisions, improve health insurance reimbursement programs, and ensure efficient allocation of precious healthcare resources.

## Limitations

Firstly, the nature of the intervention and lack of completely inert sham needles precludes the possibility of blinding both acupuncturists and patients<sup>46</sup>. But data analysts and outcome assessors will be blinded, and acupuncturists will receive training on how to minimize bias by interacting less with patients. Secondly, only patients with KL II or III will be included in this trial and results of the research will not be

1  
2  
3  
4 generalized to patients with KL IV, who might require longer treatment courses.  
5

6  
7 Thirdly, the trial only compared two common treatment courses of acupuncture, 4  
8  
9 weeks and 8 weeks, without any comparison to other courses.  
10  
11  
12  
13  
14  
15  
16

### 17 **Trial status**

18  
19 This trial is currently recruiting participants.  
20  
21  
22  
23  
24

### 25 **Acknowledgements**

26  
27 We appreciate the researchers and institutions who will collaborate in this study, as  
28  
29 well as all participants who will cooperate with our research.  
30  
31  
32  
33  
34

### 35 **Funding**

36  
37  
38 This research is supported by The National Science Fund for Distinguished Young  
39  
40 Scholars (No.81825024), The National Natural Science Foundation of China (No.  
41  
42 82104693) and The Fundamental Research Funds for the Central Universities (2023-  
43  
44 82104693) and The Fundamental Research Funds for the Central Universities (2023-  
45  
46 JYB-JBQN-028).  
47  
48  
49

### 50 **Authors' contributions**

51  
52  
53 J-FT conceived the research. J-FT and YY initiated the research design. YY, J-FT, and  
54  
55 C-ZL drafted and critically revised the manuscript for important intellectual content.  
56  
57  
58 X-ZW participated in methodological improvements of the protocol. Y-WX  
59  
60

1  
2  
3  
4 coordinated the study. C-ZL and Y-WX sought ethical approval. Y-MF assisted in  
5  
6 manuscript revision. J-FT, C-ZL and B-HM sought funding. Y-MF and B-HM  
7  
8 contributed significantly to the editing of this manuscript. All authors contributed to  
9  
10 the refinement of the research protocol and approved the final manuscript.  
11  
12  
13  
14  
15  
16

## 17 **Competing interests**

18  
19 The authors declare that they have no competing interests.  
20  
21  
22

## 23 **References**

- 24  
25 1. Katz JN, Arant KR, Loeser RF. Diagnosis and Treatment of Hip and Knee Osteoarthritis: A Review. *JAMA* 2021;325(6):568-78. doi: 10.1001/jama.2020.22171
- 26  
27 2. Hunter DJ, Bierma-Zeinstra S. Osteoarthritis. *Lancet* 2019;393(10182):1745-59. doi:  
28 10.1016/S0140-6736(19)30417-9
- 29  
30 3. Safiri S, Kolahi AA, Smith E, et al. Global, regional and national burden of osteoarthritis 1990-  
31 2017: a systematic analysis of the Global Burden of Disease Study 2017. *Ann Rheum Dis*  
32 2020;79(6):819-28. doi: 10.1136/annrheumdis-2019-216515
- 33  
34 4. Chen AT, Shrestha S, Collins JE, et al. Estimating contextual effect in nonpharmacological  
35 therapies for pain in knee osteoarthritis: a systematic analytic review. *Osteoarthritis Cartilage*  
36 2020;28(9):1154-69. doi: 10.1016/j.joca.2020.05.007
- 37  
38 5. Silverwood V, Blagojevic-Bucknall M, Jinks C, et al. Current evidence on risk factors for knee  
39 osteoarthritis in older adults: a systematic review and meta-analysis. *Osteoarthritis Cartilage*  
40 2015;23(4):507-15. doi: 10.1016/j.joca.2014.11.019
- 41  
42 6. Cross M, Smith E, Hoy D, et al. The global burden of hip and knee osteoarthritis: estimates from  
43 the global burden of disease 2010 study. *Ann Rheum Dis* 2014;73(7):1323-30. doi:  
44 10.1136/annrheumdis-2013-204763
- 45  
46 7. Hardenberg M, Spekle EM, Coenen P, et al. The economic burden of knee and hip osteoarthritis:  
47 absenteeism and costs in the Dutch workforce. *BMC Musculoskelet Disord* 2022;23(1):364. doi:  
48 10.1186/s12891-022-05306-9
- 49  
50 8. Nelson AE, Allen KD, Golightly YM, et al. A systematic review of recommendations and  
51 guidelines for the management of osteoarthritis: The chronic osteoarthritis management initiative  
52 of the U.S. bone and joint initiative. *Semin Arthritis Rheum* 2014;43(6):701-12. doi:  
53 10.1016/j.semarthrit.2013.11.012
- 54  
55 9. da Costa BR, Reichenbach S, Keller N, et al. Effectiveness of non-steroidal anti-inflammatory  
56 drugs for the treatment of pain in knee and hip osteoarthritis: a network meta-analysis. *Lancet*  
57 2017;390(10090):e21-e33. doi: 10.1016/S0140-6736(17)31744-0
- 58  
59 10. da Costa BR, Reichenbach S, Keller N, et al. RETRACTED: Effectiveness of non-steroidal anti-  
60

- inflammatory drugs for the treatment of pain in knee and hip osteoarthritis: a network meta-analysis. *Lancet* 2016;387(10033):2093-105. doi: 10.1016/S0140-6736(16)30002-2
11. Juni P, Hari R, Rutjes AW, et al. Intra-articular corticosteroid for knee osteoarthritis. *Cochrane Database Syst Rev* 2015;2015(10):CD005328. doi: 10.1002/14651858.CD005328.pub3
  12. Orchard JW. Is there a place for intra-articular corticosteroid injections in the treatment of knee osteoarthritis? *BMJ* 2020;368:l6923. doi: 10.1136/bmj.l6923
  13. Cepeda MS, Camargo F, Zea C, et al. Tramadol for osteoarthritis: a systematic review and metaanalysis. *J Rheumatol* 2007;34(3):543-55
  14. da Costa BR, Nuesch E, Kasteler R, et al. Oral or transdermal opioids for osteoarthritis of the knee or hip. *Cochrane Database Syst Rev* 2014(9):CD003115. doi: 10.1002/14651858.CD003115.pub4
  15. da Costa BR, Pereira TV, Saadat P, et al. Effectiveness and safety of non-steroidal anti-inflammatory drugs and opioid treatment for knee and hip osteoarthritis: network meta-analysis. *BMJ* 2021;375:n2321. doi: 10.1136/bmj.n2321
  16. Osani MC, Lohmander LS, Bannuru RR. Is There Any Role for Opioids in the Management of Knee and Hip Osteoarthritis? A Systematic Review and Meta-Analysis. *Arthritis Care Res (Hoboken)* 2021;73(10):1413-24. doi: 10.1002/acr.24363
  17. Price AJ, Alvand A, Troelsen A, et al. Knee replacement. *Lancet* 2018;392(10158):1672-82. doi: 10.1016/S0140-6736(18)32344-4
  18. Murray KE, Murray TE, O'Rourke AC, et al. Readability and Quality of Online Information on Osteoarthritis: An Objective Analysis With Historic Comparison. *Interact J Med Res* 2019;8(3):e12855. doi: 10.2196/12855
  19. Dantas LO, Salvini TF, McAlindon TE. Knee osteoarthritis: key treatments and implications for physical therapy. *Braz J Phys Ther* 2021;25(2):135-46. doi: 10.1016/j.bjpt.2020.08.004
  20. Kolasinski SL, Neogi T, Hochberg MC, et al. 2019 American College of Rheumatology/Arthritis Foundation Guideline for the Management of Osteoarthritis of the Hand, Hip, and Knee. *Arthritis Rheumatol* 2020;72(2):220-33. doi: 10.1002/art.41142
  21. Hunter DJ, Harris RE. Acupuncture and Knee Osteoarthritis: Does Dose Matter? *Arthritis Rheumatol* 2021;73(3):371-73. doi: 10.1002/art.41583
  22. Chon TY, Lee MC. Acupuncture. *Mayo Clin Proc* 2013;88(10):1141-6. doi: 10.1016/j.mayocp.2013.06.009
  23. Witt CM, Reinhold T, Jena S, et al. Cost-effectiveness of acupuncture treatment in patients with headache. *Cephalalgia* 2008;28(4):334-45. doi: 10.1111/j.1468-2982.2007.01504.x
  24. MacPherson H, Thomas K, Walters S, et al. The York acupuncture safety study: prospective survey of 34 000 treatments by traditional acupuncturists. *BMJ* 2001;323(7311):486-7. doi: 10.1136/bmj.323.7311.486
  25. Vickers AJ, Vertosick EA, Lewith G, et al. Acupuncture for Chronic Pain: Update of an Individual Patient Data Meta-Analysis. *J Pain* 2018;19(5):455-74. doi: 10.1016/j.jpain.2017.11.005
  26. Mei F, Yao M, Wang Y, et al. Acupuncture for knee osteoarthritis: A systematic review and meta-analysis. *J Evid Based Med* 2023;16(2):138-40. doi: 10.1111/jebm.12532
  27. Brophy RH, Fillingim YA. AAOS Clinical Practice Guideline Summary: Management of Osteoarthritis of the Knee (Nonarthroplasty), Third Edition. *J Am Acad Orthop Surg* 2022;30(9):e721-e29. doi: 10.5435/JAAOS-D-21-01233
  28. Sun N, Tu JF, Lin LL, et al. Correlation between acupuncture dose and effectiveness in the treatment of knee osteoarthritis: a systematic review. *Acupunct Med* 2019;37(5):261-67. doi:



- 10.1136/acupmed-2017-011608
29. Witt C, Brinkhaus B, Jena S, et al. Acupuncture in patients with osteoarthritis of the knee: a randomised trial. *Lancet* 2005;366(9480):136-43. doi: 10.1016/S0140-6736(05)66871-7
  30. Tu JF, Yang JW, Shi GX, et al. Efficacy of Intensive Acupuncture Versus Sham Acupuncture in Knee Osteoarthritis: A Randomized Controlled Trial. *Arthritis Rheumatol* 2021;73(3):448-58. doi: 10.1002/art.41584
  31. Chen N, Wang J, Mucelli A, et al. Electro-Acupuncture is Beneficial for Knee Osteoarthritis: The Evidence from Meta-Analysis of Randomized Controlled Trials. *Am J Chin Med* 2017;45(5):965-85. doi: 10.1142/S0192415X17500513
  32. Chen Y, Jia YJ, Lu JH, et al. [Comparison of therapeutic effect of different acupuncture methods for knee osteoarthritis]. *Zhen Ci Yan Jiu* 2020;45(7):569-73. doi: 10.13702/j.1000-0607.191015
  33. Bao F, Zhang Y, Wu ZH, et al. [Efficacy observation on knee osteoarthritis treated with electroacupuncture and its influence on articular cartilage with T2 mapping]. *Zhongguo Zhen Jiu* 2013;33(3):193-7
  34. Sangdee C, Teekachunhatean S, Sananpanich K, et al. Electroacupuncture versus diclofenac in symptomatic treatment of osteoarthritis of the knee: a randomized controlled trial. *BMC Complement Altern Med* 2002;2:3. doi: 10.1186/1472-6882-2-3
  35. Huang DE, Qin Y, Lin MN, et al. [Clinical efficacy of different waves of electroacupuncture on knee osteoarthritis and its effect on TGF-beta1 in joint fluid]. *Zhongguo Zhen Jiu* 2020;40(4):370-4. doi: 10.13703/j.0255-2930.20190422-0005
  36. Lu N, Cheng P, Xia JX, et al. [Effect of acupuncture combined with moxibustion on serum matrix metalloproteinase-9 and matrix metalloproteinase inhibitor-1 in patients with knee osteoarthritis]. *Zhen Ci Yan Jiu* 2022;47(3):262-7. doi: 10.10372/j.1000-0607.20210079
  37. Luo X, Liu J, Li Q, et al. Acupuncture for treatment of knee osteoarthritis: A clinical practice guideline. *J Evid Based Med* 2023;16(2):237-45. doi: 10.1111/jebm.12526
  38. Yu Y KS, Tu JF, et al. Effect of acupuncture duration in patients with knee osteoarthritis: A secondary analysis of a multi-center randomized controlled trial. *World J Acupunct Moxibustion* 2023. doi: 10.1016/j.wjam.2023.10.004
  39. Chan AW, Tetzlaff JM, Altman DG, et al. SPIRIT 2013 statement: defining standard protocol items for clinical trials. *Ann Intern Med* 2013;158(3):200-7. doi: 10.7326/0003-4819-158-3-201302050-00583
  40. Hochberg MC, Altman RD, Brandt KD, et al. Guidelines for the medical management of osteoarthritis. Part II. Osteoarthritis of the knee. American College of Rheumatology. *Arthritis Rheum* 1995;38(11):1541-6. doi: 10.1002/art.1780381104
  41. Jensen MP, Karoly P, Braver S. The measurement of clinical pain intensity: a comparison of six methods. *Pain* 1986;27(1):117-26. doi: 10.1016/0304-3959(86)90228-9
  42. Tubach F, Ravaud P, Baron G, et al. Evaluation of clinically relevant changes in patient reported outcomes in knee and hip osteoarthritis: the minimal clinically important improvement. *Ann Rheum Dis* 2005;64(1):29-33. doi: 10.1136/ard.2004.022905
  43. Bellamy N, Buchanan WW, Goldsmith CH, et al. Validation study of WOMAC: a health status instrument for measuring clinically important patient relevant outcomes to antirheumatic drug therapy in patients with osteoarthritis of the hip or knee. *J Rheumatol* 1988;15(12):1833-40
  44. Ware J, Jr., Kosinski M, Keller SD. A 12-Item Short-Form Health Survey: construction of scales and preliminary tests of reliability and validity. *Med Care* 1996;34(3):220-33. doi:

1  
2  
3 10.1097/00005650-199603000-00003

- 4 45. Pham T, Van Der Heijde D, Lassere M, et al. Outcome variables for osteoarthritis clinical trials:  
5 The OMERACT-OARSI set of responder criteria. *J Rheumatol* 2003;30(7):1648-54  
6  
7 46. Lee B, Kim TH, Birch S, et al. Comparative effectiveness of acupuncture in sham-controlled trials  
8 for knee osteoarthritis: A systematic review and network meta-analysis. *Front Med (Lausanne)*  
9 2022;9:1061878. doi: 10.3389/fmed.2022.1061878  
10  
11  
12  
13

## 14 **Figure legends**

15  
16  
17 Figure 1 The schedule of assessments

18  
19 NRS: numerical rating scale, WOMAC: Western Ontario and McMaster Universities

20  
21 Osteoarthritis Index, SF-12: 12 item Short Form Health Survey, OARSI: Osteoarthritis

22  
23 Research Society International  
24

25  
26  
27 Figure 2 The flow diagram of the trial

28  
29 KOA: knee osteoarthritis

30  
31  
32 Figure 3 Meridian acupoints chart

33  
34 Red points: obligatory acupoints; blue points: foot yangming meridian syndrome;

35  
36 purple points: foot shaoyang meridian syndrome; yellow points: foot taiyang meridian

37  
38 syndrome; green points: foot three-yin meridian syndrome  
39  
40  
41  
42  
43  
44  
45  
46  
47  
48  
49  
50  
51  
52  
53  
54  
55  
56  
57  
58  
59  
60

| Time point                        | Study period |            |                |        |         |          |
|-----------------------------------|--------------|------------|----------------|--------|---------|----------|
|                                   | Enrollment   | Allocation | Postallocation |        |         | Closeout |
|                                   | Week -1      | Week 0     | Week 4         | Week 8 | Week 16 | Week 26  |
| Enrollment:<br>Eligibility screen | x            |            |                |        |         |          |
| Informed consent                  | x            |            |                |        |         |          |
| Allocation                        |              | x          |                |        |         |          |
| Interventions:<br>4-week group    |              |            | ←→             |        |         |          |
| 8-week group                      |              |            | ←→             |        |         |          |
| Assessment:<br>Response rate      |              |            | x              | x      | x       | x        |
| NRS                               | x            |            | x              | x      | x       | x        |
| WOAMC                             | x            |            | x              | x      | x       | x        |
| SF-12                             | x            |            | x              | x      | x       | x        |
| Patient global assessment         | x            |            | x              | x      | x       | x        |
| The OARSI response rate           |              |            | x              | x      | x       | x        |
| Rescue medicine                   |              |            | x              | x      | x       | x        |
| Adverse events                    |              |            | x              | x      | x       | x        |

NRS: numerical rating scale, WOMAC: Western Ontario and McMaster Universities Osteoarthritis Index, SF-12: 12 item Short Form Health Survey, OARSI: Osteoarthritis Research Society International

38x21mm (600 x 600 DPI)

1  
2  
3  
4  
5  
6  
7  
8  
9  
10  
11  
12  
13  
14  
15  
16  
17  
18  
19  
20  
21  
22  
23  
24  
25  
26  
27  
28  
29  
30  
31  
32  
33  
34  
35  
36  
37  
38  
39  
40  
41  
42  
43  
44  
45  
46  
47  
48  
49  
50  
51  
52  
53  
54  
55  
56  
57  
58  
59  
60

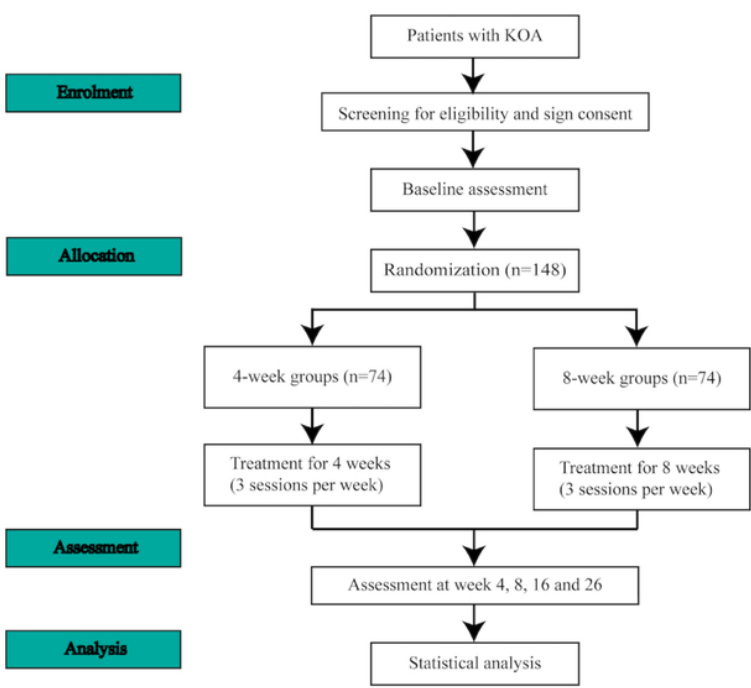

KOA: knee osteoarthritis

34x25mm (600 x 600 DPI)



Red points: obligatory acupoints; blue points: foot yangming meridian syndrome; purple points: foot shaoyang meridian syndrome; yellow points: foot taiyang meridian syndrome; green points: foot three-yin meridian syndrome

33x20mm (600 x 600 DPI)

1  
2  
3  
4  
5  
6  
7  
8  
9  
10  
11  
12  
13  
14  
15  
16  
17  
18  
19  
20  
21  
22  
23  
24  
25  
26  
27  
28  
29  
30  
31  
32  
33  
34  
35  
36  
37  
38  
39  
40  
41  
42  
43  
44  
45  
46

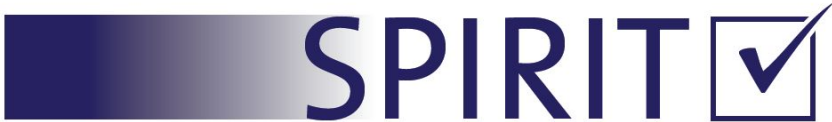

STANDARD PROTOCOL ITEMS: RECOMMENDATIONS FOR INTERVENTIONAL TRIALS

**SPIRIT 2013 Checklist: Recommended items to address in a clinical trial protocol and related documents\***

| Section/item                      | Item No | Description                                                                                                                                                                                                                                                                              | Page   |
|-----------------------------------|---------|------------------------------------------------------------------------------------------------------------------------------------------------------------------------------------------------------------------------------------------------------------------------------------------|--------|
| <b>Administrative information</b> |         |                                                                                                                                                                                                                                                                                          |        |
| Title                             | 1       | Descriptive title identifying the study design, population, interventions, and, if applicable, trial acronym                                                                                                                                                                             | 1      |
| Trial registration                | 2a      | Trial identifier and registry name. If not yet registered, name of intended registry                                                                                                                                                                                                     | 3      |
|                                   | 2b      | All items from the World Health Organization Trial Registration Data Set                                                                                                                                                                                                                 | 5-16   |
| Protocol version                  | 3       | Date and version identifier                                                                                                                                                                                                                                                              | 3      |
| Funding                           | 4       | Sources and types of financial, material, and other support                                                                                                                                                                                                                              | 20     |
| Roles and responsibilities        | 5a      | Names, affiliations, and roles of protocol contributors                                                                                                                                                                                                                                  | 1-2,21 |
|                                   | 5b      | Name and contact information for the trial sponsor                                                                                                                                                                                                                                       | 20     |
|                                   | 5c      | Role of study sponsor and funders, if any, in study design; collection, management, analysis, and interpretation of data; writing of the report; and the decision to submit the report for publication, including whether they will have ultimate authority over any of these activities | 20     |
|                                   | 5d      | Composition, roles, and responsibilities of the coordinating centre, steering committee, endpoint adjudication committee, data management team, and other individuals or groups overseeing the trial, if applicable (see Item 21a for data monitoring committee)                         | 15-16  |

**SPIRIT 2013 Checklist: Recommended items to address in a clinical trial protocol and related documents\*(continued)**

| Section/item                                                                                                              | Item No | Description                                                                                                                                                                                               | Page           |
|---------------------------------------------------------------------------------------------------------------------------|---------|-----------------------------------------------------------------------------------------------------------------------------------------------------------------------------------------------------------|----------------|
| <b>Introduction</b>                                                                                                       |         |                                                                                                                                                                                                           |                |
| Background and rationale                                                                                                  | 6a      | Description of research question and justification for undertaking the trial, including summary of relevant studies (published and unpublished) examining benefits and harms for each intervention        | 5-6            |
|                                                                                                                           | 6b      | Explanation for choice of comparators                                                                                                                                                                     | 5-6,18         |
| Objectives                                                                                                                | 7       | Specific objectives or hypotheses                                                                                                                                                                         | 6              |
| Trial design                                                                                                              | 8       | Description of trial design including type of trial (eg, parallel group, crossover, factorial, single group), allocation ratio, and framework (eg, superiority, equivalence, noninferiority, exploratory) | 6-7            |
| <b>Methods: Participants, interventions, and outcomes</b>                                                                 |         |                                                                                                                                                                                                           |                |
| Study setting                                                                                                             | 9       | Description of study settings (eg, community clinic, academic hospital) and list of countries where data will be collected. Reference to where list of study sites can be obtained                        | 7              |
| Eligibility criteria                                                                                                      | 10      | Inclusion and exclusion criteria for participants. If applicable, eligibility criteria for study centres and individuals who will perform the interventions (eg, surgeons, psychotherapists)              | 7-8            |
| Interventions                                                                                                             | 11a     | Interventions for each group with sufficient detail to allow replication, including how and when they will be administered                                                                                | 9-12           |
|                                                                                                                           | 11b     | Criteria for discontinuing or modifying allocated interventions for a given trial participant (eg, drug dose change in response to harms, participant request, or improving/worsening disease)            | Not applicable |
| <b>SPIRIT 2013 Checklist: Recommended items to address in a clinical trial protocol and related documents*(continued)</b> |         |                                                                                                                                                                                                           |                |

| Section/item         | Item No | Description                                                                                                                                                                                                                                                                                                                                                                    | Page                   |
|----------------------|---------|--------------------------------------------------------------------------------------------------------------------------------------------------------------------------------------------------------------------------------------------------------------------------------------------------------------------------------------------------------------------------------|------------------------|
|                      | 11c     | Strategies to improve adherence to intervention protocols, and any procedures for monitoring adherence (eg, drug tablet return, laboratory tests)                                                                                                                                                                                                                              | 9                      |
|                      | 11d     | Relevant concomitant care and interventions that are permitted or prohibited during the trial                                                                                                                                                                                                                                                                                  | 9                      |
| Outcomes             | 12      | Primary, secondary, and other outcomes, including the specific measurement variable (eg, systolic blood pressure), analysis metric (eg, change from baseline, final value, time to event), method of aggregation (eg, median, proportion), and time point for each outcome. Explanation of the clinical relevance of chosen efficacy and harm outcomes is strongly recommended | 12-15                  |
| Participant timeline | 13      | Time schedule of enrolment, interventions (including any run-ins and washouts), assessments, and visits for participants. A schematic diagram is highly recommended (see Figure)                                                                                                                                                                                               | 6-7, Figure 1, Table 4 |
| Sample size          | 14      | Estimated number of participants needed to achieve study objectives and how it was determined, including clinical and statistical assumptions supporting any sample size calculations                                                                                                                                                                                          | 16-17                  |
| Recruitment          | 15      | Strategies for achieving adequate participant enrolment to reach target sample size                                                                                                                                                                                                                                                                                            | 7                      |

### Methods: Assignment of interventions (for controlled trials)

#### Allocation:

|                     |     |                                                                                                                                                                                                                                                                                                                                                          |     |
|---------------------|-----|----------------------------------------------------------------------------------------------------------------------------------------------------------------------------------------------------------------------------------------------------------------------------------------------------------------------------------------------------------|-----|
| Sequence generation | 16a | Method of generating the allocation sequence (eg, computer-generated random numbers), and list of any factors for stratification. To reduce predictability of a random sequence, details of any planned restriction (eg, blocking) should be provided in a separate document that is unavailable to those who enrol participants or assign interventions | 8-9 |
|---------------------|-----|----------------------------------------------------------------------------------------------------------------------------------------------------------------------------------------------------------------------------------------------------------------------------------------------------------------------------------------------------------|-----|

### SPIRIT 2013 Checklist: Recommended items to address in a clinical trial protocol and related documents\*(continued)



| Section/item                                              | Item No | Description                                                                                                                                                                                                                                                                                                                                                                                                  | Page  |
|-----------------------------------------------------------|---------|--------------------------------------------------------------------------------------------------------------------------------------------------------------------------------------------------------------------------------------------------------------------------------------------------------------------------------------------------------------------------------------------------------------|-------|
| Allocation concealment mechanism                          | 16b     | Mechanism of implementing the allocation sequence (eg, central telephone; sequentially numbered, opaque, sealed envelopes), describing any steps to conceal the sequence until interventions are assigned                                                                                                                                                                                                    | 8-9   |
| Implementation                                            | 16c     | Who will generate the allocation sequence, who will enrol participants, and who will assign participants to interventions                                                                                                                                                                                                                                                                                    | 8-9   |
| Blinding (masking)                                        | 17a     | Who will be blinded after assignment to interventions (eg, trial participants, care providers, outcome assessors, data analysts), and how                                                                                                                                                                                                                                                                    | 9     |
|                                                           | 17b     | If blinded, circumstances under which unblinding is permissible, and procedure for revealing a participant's allocated intervention during the trial                                                                                                                                                                                                                                                         | 9     |
| <b>Methods: Data collection, management, and analysis</b> |         |                                                                                                                                                                                                                                                                                                                                                                                                              |       |
| Data collection methods                                   | 18a     | Plans for assessment and collection of outcome, baseline, and other trial data, including any related processes to promote data quality (eg, duplicate measurements, training of assessors) and a description of study instruments (eg, questionnaires, laboratory tests) along with their reliability and validity, if known. Reference to where data collection forms can be found, if not in the protocol | 15-16 |
|                                                           | 18b     | Plans to promote participant retention and complete follow-up, including list of any outcome data to be collected for participants who discontinue or deviate from intervention protocols                                                                                                                                                                                                                    | 15-16 |
| Data management                                           | 19      | Plans for data entry, coding, security, and storage, including any related processes to promote data quality (eg, double data entry; range checks for data values). Reference to where details of data management procedures can be found, if not in the protocol                                                                                                                                            | 15-16 |
| Statistical methods                                       | 20a     | Statistical methods for analysing primary and secondary outcomes. Reference to where other details of the statistical analysis plan can be found, if not in the protocol                                                                                                                                                                                                                                     | 17-18 |

**SPIRIT 2013 Checklist: Recommended items to address in a clinical trial protocol and related documents\*(continued)**

1  
2  
3  
4  
5  
6  
7  
8  
9  
10  
11  
12  
13  
14  
15  
16  
17  
18  
19  
20  
21  
22  
23  
24  
25  
26  
27  
28  
29  
30  
31  
32  
33  
34  
35  
36  
37  
38  
39  
40  
41  
42  
43  
44  
45  
46

| Section/item                    | Item No | Description                                                                                                                                                                                                                                                                                                                           | Page           |
|---------------------------------|---------|---------------------------------------------------------------------------------------------------------------------------------------------------------------------------------------------------------------------------------------------------------------------------------------------------------------------------------------|----------------|
|                                 | 20b     | Methods for any additional analyses (eg, subgroup and adjusted analyses)                                                                                                                                                                                                                                                              | 17-18          |
|                                 | 20c     | Definition of analysis population relating to protocol non-adherence (eg, as randomised analysis), and any statistical methods to handle missing data (eg, multiple imputation)                                                                                                                                                       | 17-18          |
| <b>Methods: Monitoring</b>      |         |                                                                                                                                                                                                                                                                                                                                       |                |
| Data monitoring                 | 21a     | Composition of data monitoring committee (DMC); summary of its role and reporting structure; statement of whether it is independent from the sponsor and competing interests; and reference to where further details about its charter can be found, if not in the protocol. Alternatively, an explanation of why a DMC is not needed | 16             |
|                                 | 21b     | Description of any interim analyses and stopping guidelines, including who will have access to these interim results and make the final decision to terminate the trial                                                                                                                                                               | Not applicable |
| Harms                           | 22      | Plans for collecting, assessing, reporting, and managing solicited and spontaneously reported adverse events and other unintended effects of trial interventions or trial conduct                                                                                                                                                     | 15             |
| Auditing                        | 23      | Frequency and procedures for auditing trial conduct, if any, and whether the process will be independent from investigators and the sponsor                                                                                                                                                                                           | 15-16          |
| <b>Ethics and dissemination</b> |         |                                                                                                                                                                                                                                                                                                                                       |                |
| Research ethics approval        | 24      | Plans for seeking research ethics committee/institutional review board (REC/IRB) approval                                                                                                                                                                                                                                             | 21             |
| Protocol amendments             | 25      | Plans for communicating important protocol modifications (eg, changes to eligibility criteria, outcomes, analyses) to relevant parties (eg, investigators, REC/IRBs, trial participants, trial registries, journals, regulators)                                                                                                      | Not applicable |

**SPIRIT 2013 Checklist: Recommended items to address in a clinical trial protocol and related documents\*(continued)**

| Section/item                  | Item No | Description                                                                                                                                                                                                                                                                         | Page           |
|-------------------------------|---------|-------------------------------------------------------------------------------------------------------------------------------------------------------------------------------------------------------------------------------------------------------------------------------------|----------------|
| Consent or assent             | 26a     | Who will obtain informed consent or assent from potential trial participants or authorised surrogates, and how (see Item 32)                                                                                                                                                        | 7              |
|                               | 26b     | Additional consent provisions for collection and use of participant data and biological specimens in ancillary studies, if applicable                                                                                                                                               | Not applicable |
| Confidentiality               | 27      | How personal information about potential and enrolled participants will be collected, shared, and maintained in order to protect confidentiality before, during, and after the trial                                                                                                | 15             |
| Declaration of interests      | 28      | Financial and other competing interests for principal investigators for the overall trial and each study site                                                                                                                                                                       | 21-22          |
| Access to data                | 29      | Statement of who will have access to the final trial dataset, and disclosure of contractual agreements that limit such access for investigators                                                                                                                                     | 20-21          |
| Ancillary and post-trial care | 30      | Provisions, if any, for ancillary and post-trial care, and for compensation to those who suffer harm from trial participation                                                                                                                                                       | Not applicable |
| Dissemination policy          | 31a     | Plans for investigators and sponsor to communicate trial results to participants, healthcare professionals, the public, and other relevant groups (eg, via publication, reporting in results databases, or other data sharing arrangements), including any publication restrictions | 20-21          |
|                               | 31b     | Authorship eligibility guidelines and any intended use of professional writers                                                                                                                                                                                                      | 20-21          |
|                               | 31c     | Plans, if any, for granting public access to the full protocol, participant-level dataset, and statistical code                                                                                                                                                                     | Not applicable |

**SPIRIT 2013 Checklist: Recommended items to address in a clinical trial protocol and related documents\*(continued)**

1  
2  
3  
4  
5  
6  
7  
8  
9  
10  
11  
12  
13  
14  
15  
16  
17  
18  
19  
20  
21  
22  
23  
24  
25  
26  
27  
28  
29  
30  
31  
32  
33  
34  
35  
36  
37  
38  
39  
40  
41  
42  
43  
44  
45  
46

| Section/item               | Item No | Description                                                                                                                                                                                    | Page               |
|----------------------------|---------|------------------------------------------------------------------------------------------------------------------------------------------------------------------------------------------------|--------------------|
| <b>Appendices</b>          |         |                                                                                                                                                                                                |                    |
| Informed consent materials | 32      | Model consent form and other related documentation given to participants and authorised surrogates                                                                                             | supplementary file |
| Biological specimens       | 33      | Plans for collection, laboratory evaluation, and storage of biological specimens for genetic or molecular analysis in the current trial and for future use in ancillary studies, if applicable | Not applicable     |

\*It is strongly recommended that this checklist be read in conjunction with the SPIRIT 2013 Explanation & Elaboration for important clarification on the items. Amendments to the protocol should be tracked and dated. The SPIRIT checklist is copyrighted by the SPIRIT Group under the Creative Commons "[Attribution-NonCommercial-NoDerivs 3.0 Unported](https://creativecommons.org/licenses/by-nc-nd/3.0/)" license.

review only

**Supplemental Table 1 Differences and similarities for 4-week group and 8-week group**

|                | 4-week group                                  | 8-week group                                  |
|----------------|-----------------------------------------------|-----------------------------------------------|
| Course         | 4 weeks                                       | 8 weeks                                       |
| Session        | 12 sessions                                   | 24 sessions                                   |
| Frequency      | 3 times per week                              | 3 times per week                              |
| Duration       | 30 minutes each                               | 30 minutes each                               |
| Acupoint       | 5 essential acupoints and 3 adjunct acupoints | 5 essential acupoints and 3 adjunct acupoints |
| EA stimulation | a dilatation wave of 2/100 Hz                 | a dilatation wave of 2/100 Hz                 |

For peer review only

# BMJ Open

## Effect of 4 weeks versus 8 weeks of acupuncture for knee osteoarthritis in China: protocol for a randomized controlled trial

|                                 |                                                                                                                                                                                                                                                                                                                                                                                                                                                                                                                                                                                                                                             |
|---------------------------------|---------------------------------------------------------------------------------------------------------------------------------------------------------------------------------------------------------------------------------------------------------------------------------------------------------------------------------------------------------------------------------------------------------------------------------------------------------------------------------------------------------------------------------------------------------------------------------------------------------------------------------------------|
| Journal:                        | <i>BMJ Open</i>                                                                                                                                                                                                                                                                                                                                                                                                                                                                                                                                                                                                                             |
| Manuscript ID                   | bmjopen-2023-079709.R2                                                                                                                                                                                                                                                                                                                                                                                                                                                                                                                                                                                                                      |
| Article Type:                   | Protocol                                                                                                                                                                                                                                                                                                                                                                                                                                                                                                                                                                                                                                    |
| Date Submitted by the Author:   | 04-Jan-2024                                                                                                                                                                                                                                                                                                                                                                                                                                                                                                                                                                                                                                 |
| Complete List of Authors:       | Yu, Ying; Beijing University of Chinese Medicine, School of Acupuncture-Moxibustion and Tuina<br>Liu, Cun-Zhi; Beijing University of Chinese Medicine, School of Acupuncture-Moxibustion and Tuina<br>Wang, Xue-Zhou; Beijing University of Chinese Medicine, School of Acupuncture-Moxibustion and Tuina<br>Xi, Ya-Wei; Liangxiang Hospital of Beijing Fangshan District<br>Fu, Yi-Ming; Beijing University of Chinese Medicine, School of Acupuncture-Moxibustion and Tuina<br>Mi, Bao-Hong; Beijing University of Chinese Medicine<br>Tu, Jian-Feng; Beijing University of Chinese Medicine, School of Acupuncture-Moxibustion and Tuina |
| <b>Primary Subject Heading</b>: | Complementary medicine                                                                                                                                                                                                                                                                                                                                                                                                                                                                                                                                                                                                                      |
| Secondary Subject Heading:      | Rehabilitation medicine, Rheumatology                                                                                                                                                                                                                                                                                                                                                                                                                                                                                                                                                                                                       |
| Keywords:                       | COMPLEMENTARY MEDICINE, Protocols & guidelines < HEALTH SERVICES ADMINISTRATION & MANAGEMENT, Musculoskeletal disorders < ORTHOPAEDIC & TRAUMA SURGERY                                                                                                                                                                                                                                                                                                                                                                                                                                                                                      |
|                                 |                                                                                                                                                                                                                                                                                                                                                                                                                                                                                                                                                                                                                                             |

SCHOLARONE™  
Manuscripts

1  
2  
3  
4 **Effect of 4 weeks versus 8 weeks of acupuncture for knee**  
5  
6 **osteoarthritis in China: protocol for a randomized controlled trial**  
7  
8

9 Ying Yu<sup>1</sup>, Cun-Zhi Liu<sup>1</sup>, Xue-Zhou Wang<sup>1</sup>, Ya-Wei Xi<sup>2</sup>, Yi-Ming Fu<sup>1</sup>, Bao-Hong Mi<sup>1</sup>,  
10  
11 Jian-Feng Tu<sup>1\*</sup>  
12

13  
14 <sup>1</sup> International Acupuncture and Moxibustion Innovation Institute, School of  
15  
16 Acupuncture-Moxibustion and Tuina, Beijing University of Chinese Medicine,  
17  
18 Beijing 100029, China.  
19

20  
21 <sup>2</sup> Acupuncture-Moxibustion Department, Beijing Liangxiang Hospital, Beijing,  
22  
23 China.  
24

25 Correspondence Author:  
26

27 \*Jian-Feng Tu  
28

29  
30 Tel: 00861053912201; Fax: 00861053912201; E-address: [tujianfeng1@126.com](mailto:tujianfeng1@126.com);  
31

32  
33 Address: School of Acupuncture and Moxibustion, Beijing University of Chinese  
34  
35 Medicine. 11 Bei San Huan Dong Lu, Chaoyang District, Beijing, 100029 China.  
36

37  
38 Word count: 3525.  
39

40  
41 Number of figures: 3 Figures.  
42

43  
44 Number of tables: 3 Tables.  
45  
46  
47  
48  
49  
50  
51  
52  
53  
54  
55  
56  
57  
58  
59  
60

## Abstract

**Introduction** Knee osteoarthritis represents the prevalent and incapacitating disease.

Acupuncture, a widely used clinical treatment for knee osteoarthritis, has been shown to ameliorate pain and enhance joint function in affected individuals. However, there is a lack of evidence comparing different courses of acupuncture for knee osteoarthritis.

In this trial, we will assess the effect of 4 weeks versus 8 weeks of acupuncture in patients with knee osteoarthritis.

**Methods and analysis** The protocol is a pragmatic, parallel, two-armed randomized controlled trial, with data analyst and assessor being blinded. 148 eligible patients with knee osteoarthritis will be randomly allocated in a 1:1 ratio to receive 4-week or 8-week acupuncture. Electro-acupuncture will be administered 3 times per week for 4 or 8 weeks, respectively. Patients with knee osteoarthritis in both groups will be followed up to 26 weeks. The primary outcome is the response rate at week 26, and secondary outcomes include knee-joint pain, knee-joint function, knee-joint stiffness, quality of life, patient global assessment, the Osteoarthritis Research Society International response rate and rescue medicine. A cost-effectiveness analysis will be carried out over 26 weeks.

**Ethics and dissemination** The protocol has been approved by the Medical Ethical Committee of Beijing University of Chinese Medicine (2023BZYL0506). The study findings will be disseminated through presentation in a medical journal. Additionally, we plan to present them at selected conferences and scientific meetings.



1  
2  
3  
4 **Trial registration** The trial has been registered in the Chinese Clinical Trials Registry

5  
6 (ChiCTR2300073383. Register date: July 10, 2023,

7  
8  
9 <https://www.chictr.org.cn/showproj.html?proj=199310>).

10  
11  
12  
13  
14  
15  
16  
17  
18  
19  
20  
21  
22  
23  
24  
25  
26  
27  
28  
29  
30  
31  
32  
33  
34  
35  
36  
37  
38  
39  
40  
41  
42  
43  
44  
45  
46  
47  
48  
49  
50  
51  
52  
53  
54  
55  
56  
57  
58  
59  
60

For peer review only

## Strengths and limitations of this study

1. Different courses of acupuncture for knee osteoarthritis will be head-to-head compared in this randomized controlled trial.
2. During the trial, various researchers will be responsible for the generation of the random number sequence, allocation concealment, patients' recruitment, acupuncture treatment and outcome measure assessment to control bias.
3. Cost effectiveness of acupuncture will be assessed over 26 weeks in both 4-week and 8-week groups.
4. The nature of the intervention precludes the possibility of blinding both acupuncturists and patients, which may bring bias.
5. The trial will only compare 2 common treatment courses of acupuncture, 4 weeks and 8 weeks, without any comparison to other courses.

## Background

Osteoarthritis, a degenerative joint disease, is a prevalent affliction among adults globally, with the knee joint being the most commonly affected [1, 2]. Estimates published in 2020 suggest that 300 million people worldwide are affected by hip and knee osteoarthritis (KOA) [3]. KOA is characterized by pain and functional limitations, which impairs patients' quality of life seriously [2, 4], with age, gender, obesity, excessive physical activities and previous knee trauma being some of the associated risk factors [1, 5]. Of note, female patients are more likely to suffer from KOA compared to males [1, 6]. And the incidence of KOA increases with age, making it a major contributor to disability in elderly population [1, 6]. The annual sick leave costs due to knee and hip osteoarthritis are about €40 million for the Dutch workforce, and KOA costs approximately twice as much as hip osteoarthritis [7]. KOA reduces the employability of patients and raises the cost of healthcare, which places a heavy financial burden on individuals and society.

Exercise therapy and weight loss have been shown to be effective in KOA [1], but sustained maintenance of these methods persists as a challenge [2] due to depending heavily on patient compliance [1]. Cognitive behavioral therapy may reduce pain of KOA patients, however, evidence is limited [8]. Acetaminophen and non-steroidal anti-inflammatory drugs (NSAIDs) are strongly recommended for KOA patients in the guideline [9]. Nonetheless, using acetaminophen alone is not much of a role [10]. Taking into consideration the potential gastrointestinal and cardiovascular side effect,

1  
2  
3  
4 NSAIDs should be used for shortest duration possible [11]. Intra-articular  
5  
6 corticosteroid injections may be an effective management strategy for KOA patients,  
7  
8 but prolonged usage increases the risk of joint deterioration [12, 13]. Opioid has limited  
9  
10 benefits for KOA and a elevated risk of the gastrointestinal adverse event or  
11  
12 somnolence [14, 15, 16, 17]. Over 20% of patients had a poor prognosis for knee  
13  
14 replacement [18]. Despite this, the demand for this treatment continues to grow on a  
15  
16 global scale, and young people account for an increasing proportion [18]. Opioid abuse  
17  
18 and considerable growth for joint replacement requirements lead to overstretched  
19  
20 healthcare systems. Urgent research is required to to develop new treatment options,  
21  
22 evaluate the effect of existing treatments, or enhance current approaches [19].  
23  
24  
25  
26  
27  
28  
29  
30  
31

32  
33 As an integral component of the long-standing practice of traditional Chinese medicine  
34  
35 spanning over 4000 years, acupuncture has emerged as a safe and low-risk physical  
36  
37 therapy with demonstrated cost-effectiveness [19, 20, 21, 22]. Acupuncture is widely  
38  
39 used in clinical practice to treating KOA, resulting in notable improvements in pain  
40  
41 and joint function [19, 23, 24]. In light of these findings, the American College of  
42  
43 Rheumatology and American Academy of Orthopaedic Surgeons have conditionally  
44  
45 recommended the implementation of acupuncture for KOA [8, 25]. The effect of  
46  
47 acupuncture is inherently intertwined with the treatment course [20, 26]. A cumulative  
48  
49 course of treatment is required to produce and maintain the effect of acupuncture [20].  
50  
51  
52  
53  
54  
55  
56  
57  
58  
59  
60

1  
2  
3  
4 Currently, there is a paucity of evidence about head-to-head comparison of diverse  
5  
6 acupuncture courses, with regards to their effect in treating KOA. The 8-week  
7  
8 acupuncture courses resulted in pain relief and improved joint function among KOA  
9  
10 patients [27], which was consistent with our own previous research [28]. A meta-  
11  
12 analysis has shown that a minimum of 4-week acupuncture treatment was needed to  
13  
14 alleviate symptoms in KOA patients [29]. Additionally, other studies also have shown  
15  
16 that 4-week acupuncture for KOA can conferred the relief patients' pain and  
17  
18 dysfunction [30, 31, 32, 33, 34]. 4–8 weeks of acupuncture for KOA is recommended  
19  
20 by the latest clinical practice guideline [35]. However, it is unclear which course of  
21  
22 acupuncture is more effective, 8 weeks or 4 weeks for KOA [36]. More evidence is  
23  
24 required to explain the effect of acupuncture for KOA between different treatment  
25  
26 courses. In order to address this, we conduct a trial to evaluate the effect of 4 weeks  
27  
28 versus 8 weeks of acupuncture for KOA.  
29  
30  
31  
32  
33  
34  
35  
36  
37  
38  
39

## 40 **Methods**

### 41 **Study design**

42  
43 This is a pragmatic, parallel, two-arm randomized controlled research scheduled to take  
44  
45 place at Dongzhimen Hospital and Beijing Liangxiang Hospital from August 2023 to  
46  
47 June 2024. A total of 148 eligible patients will be assigned randomly in a 1:1 ratio to  
48  
49 receive 4-week or 8-week acupuncture. Electro-acupuncture (EA) treatment will be  
50  
51 administered 3 times per week for 4 or 8 weeks. KOA patients in both groups will be  
52  
53 followed up to 26 weeks. The schedule of the assessments completed by all patients is  
54  
55  
56  
57  
58  
59  
60

1  
2  
3  
4 illustrated in Figure 1 and the research flow diagram is presented in Figure 2. The  
5  
6 protocol adheres to the principles of the Declaration of Helsinki and will be reported  
7  
8  
9 in accordance with the SPIRIT guidelines (additional file 1) [37].  
10  
11  
12  
13

## 14 **Recruitment**

15  
16  
17 Participants will be recruited from individuals diagnosed with KOA based on the  
18  
19 American College of Rheumatology (ACR) criteria [38]. Announcements will be  
20  
21 distributed through social media (WeChat), outpatient units and print advertisements.  
22  
23 Interested patients can contact the clinical research coordinator (CRC) via telephone,  
24  
25 e-mail, or WeChat to be enrolled in this research. The CRC will inform the study  
26  
27 protocol in detail with them, including the purpose, procedures, time commitment,  
28  
29 potential risks and benefits associated with participation in this trial. Following a  
30  
31 preliminary screening process for inclusion and exclusion, potential candidates will be  
32  
33 invited to undergo a face-to-face screening by CRC, who will advise patients to  
34  
35 maintain their existing lifestyle. Confidentiality measures will be taken to safeguard  
36  
37 patient privacy. Eligible participants will sign the informed consent before  
38  
39 randomization.  
40  
41  
42  
43  
44  
45  
46  
47  
48  
49

## 50 **Inclusion criteria**

- 51 1. Aged 45-75 years (both genders).
- 52
- 53 2. Diagnosed with KOA according to the ACR criteria.
- 54
- 55
- 56 3. Unilateral/bilateral chronic knee pain for over 3 months.
- 57
- 58
- 59
- 60

1  
2  
3  
4 4. Radiologic confirmation of KOA within 6 months (Kellgren–Lawrence grade II or  
5  
6 III).

7  
8  
9 5. The average score for knee pain during walking on flat ground in the last week  $\geq 4$   
10  
11 out of 10 on a numerical rating scale (NRS) [39].

12  
13  
14 6. Written informed consent.

### 15 16 17 18 19 **Exclusion criteria**

20  
21  
22 1. History of knee surgery or waiting for surgery (knee replacement or arthroscopic  
23  
24 knee surgery).

25  
26  
27 2. Knee pain caused by other diseases (autoimmune diseases, infection, malignant  
28  
29 tumours, trauma, fracture, joint loose bodies, severe effusion of joint cavity,  
30  
31 lumbosacral vertebrae disease, gout, etc.).

32  
33  
34 3. Arthroscopy within 1 year and intra-articular injection in the past 6 months.

35  
36  
37 4. Acupuncture treatment during the past 6 months.

38  
39  
40 5. Serious acute or chronic organ diseases or mental disorders.

41  
42  
43 6. Blood coagulation disorders.

44  
45  
46 7. Pregnancy and breastfeeding.

47  
48  
49 8. Cardiac pacemaker and epilepsy.

50  
51  
52 9. Participation in another clinical study within 1 month.

### 53 54 55 56 **Randomization**

1  
2  
3  
4 All eligible patients will be randomly allocated to either 4-week group or 8-week group  
5 in a 1:1 ratio through a random number sequence, which will be generated by a  
6 professional statistician who is not involved in the assessment or treatment of  
7 participants using SAS 9.3 software. This trial will use stratified block randomisation,  
8 stratified by centre, with variable block length. The random number sequence and  
9 treatment plans will be placed inside corresponding numbered opaque envelopes. After  
10 the baseline assessment of eligible participants by CRC, an independent research  
11 assistant who is separate from the trial will assign the envelopes to acupuncturists. The  
12 acupuncturists will ensure the envelopes are sealed and will open them to determine  
13 which intervention should be performed. The CRC will be responsible for enrolling  
14 participants, obtaining informed consent and requesting randomization.  
15  
16  
17  
18  
19  
20  
21  
22  
23  
24  
25  
26  
27

### 28 **Blinding**

29  
30 In consideration of the nature of the intervention, the acupuncturists and patients will  
31 not be blinded. The outcome assessor and data analyst will be blinded to group  
32 assignments. The allocation will remain undisclosed to outcome assessor and data  
33 analyst until the completion of the statistical analysis.  
34  
35  
36  
37  
38  
39  
40  
41  
42  
43

### 44 **Patient and public involvement**

45  
46 There is no patient or public involvement in study design, recruitment for or conduct  
47 of the study.  
48  
49  
50  
51  
52  
53

### 54 **Interventions**

55  
56 The acupuncture prescription, derived from clinical practice and a pre-study [28],  
57 comprises 5 essential acupoints and 3 adjunct acupoints. The essential acupoints  
58  
59  
60



consist of dubi (ST35), neixiyan (EX-LE5), ququan (LR8), xiyangguan (GB33), and an ash point (the acupoint where the patient reports the most intense pain). The acupuncturist will select appropriate adjunct acupoints based on the patient's lesion types, which has been shown in Table 1. The acupoints are localized according to the World Health Organization Standard Acupuncture Locations and are presented in Table 2 and Figure 3. Licensed acupuncturists are of minimum 5 years' experience in acupuncture. For individuals afflicted with bilateral osteoarthritis, both knees will be subjected to acupuncture needling [27]. Conversely, unilateral osteoarthritis patient only receive acupuncture therapy on the affected knee [27]. Throughout the course of the trial, patients with pain unbearable can obtain Diclofenac Sodium Enteric-coated Tablets (Beijing Novartis Pharma Ag) from the CRC, who will record the use of medication. Diclofenac Sodium Enteric-coated Tablets will be dispensed in sets of 6 tablets, 25 mg per tablet, with instructions for patients to ingest one orally three times daily.

**Table 1** The adjunct acupoints

| Meridian syndrome                           | Acupoints                                                                                                                  |
|---------------------------------------------|----------------------------------------------------------------------------------------------------------------------------|
| Foot yangming<br>(anterior side of leg)     | Liangqiu (ST34), zusanli (ST36), futu (ST32), fenglong (ST40), heding (EL-XE2)                                             |
| Foot shaoyang<br>(lateral side of the leg)  | Fengshi (GB31), waiqiu (GB36), yanglingquan (GB34), xuanzhong (GB39), zulinqi (GB41)                                       |
| Foot taiyang<br>(posterior side of the leg) | Weiyang (BL39), weizhong (BL40), chengshan (BL57), kunlun (BL60)                                                           |
| Foot three-yin<br>(medial side of the leg)  | Xiguan (LR7), yinlingquan (SP9), xuehai (SP10), yingu (KI10), gongsun (SP4), sanyinjiao (SP6), taichong (LR3), taixi (KI3) |

**Table 2** Acupoints manipulation

| Acupoints | Angle                                          | Depth        | Twisting and reinforcing  | De Qi |
|-----------|------------------------------------------------|--------------|---------------------------|-------|
| ST35      | Oblique jab in the inner-up direction          | 0.5-1 inch   | Even reinforcing-reducing | Yes   |
| EX-LE5    | Oblique jab in the external-superior direction | 0.5-1 inch   | Even reinforcing-reducing | Yes   |
| LR8       | Penetrating jab to GB33                        | 1-1.5 inch   | Reducing                  | Yes   |
| GB33      | Penetrating jab to LR8                         | 1-1.5 inch   | Reducing                  | Yes   |
| GB34      | Perpendicular inserting                        | 1-1.5 inch   | Even reinforcing-reducing | Yes   |
| EX-LE2    | Perpendicular inserting                        | 0.8-1 inch   | Even reinforcing-reducing | Yes   |
| ST34      | Perpendicular inserting                        | 1-1.2 inch   | Even reinforcing-reducing | Yes   |
| ST36      | Perpendicular inserting                        | 1-2 inch     | Reinforcing               | Yes   |
| ST40      | Perpendicular inserting                        | 1-1.5 inch   | Reducing                  | Yes   |
| ST32      | Perpendicular inserting                        | 1-2 inch     | Reinforcing               | Yes   |
| GB31      | Perpendicular inserting                        | 1-1.5 inch   | Reinforcing               | Yes   |
| GB36      | Perpendicular inserting                        | 0.5-0.8 inch | Even reinforcing-reducing | Yes   |
| GB39      | Perpendicular inserting                        | 0.5-0.8 inch | Even reinforcing-reducing | Yes   |
| GB41      | Perpendicular inserting                        | 0.5-0.8 inch | Even reinforcing-reducing | Yes   |
| BL39      | Perpendicular inserting                        | 1-1.5 inch   | reducing                  | Yes   |
| BL40      | Perpendicular inserting                        | 1-1.5 inch   | Even reinforcing-reducing | Yes   |
| BL57      | Perpendicular inserting                        | 1.5-2 inch   | Reinforcing               | Yes   |
| BL60      | Perpendicular inserting                        | 0.5-0.8 inch | Even reinforcing-reducing | Yes   |
| KI3       | Perpendicular inserting                        | 0.5-0.8 inch | Reducing                  | Yes   |
| KI10      | Perpendicular inserting                        | 1-1.5 inch   | Even reinforcing-reducing | Yes   |
| SP4       | Perpendicular inserting                        | 0.5-1.2 inch | Reducing                  | Yes   |
| SP6       | Perpendicular inserting                        | 1-1.5 inch   | Reinforcing               | Yes   |
| LR3       | Perpendicular inserting                        | 0.5-0.8 inch | Even reinforcing-reducing | Yes   |
| LR7       | Perpendicular inserting                        | 1-1.5 inch   | Even reinforcing-reducing | Yes   |
| SP9       | Perpendicular inserting                        | 1.5-2 inch   | Reducing                  | Yes   |
| SP10      | Perpendicular inserting                        | 1-2 inch     | Even reinforcing-reducing | Yes   |

Reinforcing: angle  $<90^\circ$ , frequency  $>120\text{r/min}$ ; Even reinforcing-reducing: angle between  $120^\circ$  and  $180^\circ$ , frequency between 60 and  $120\text{r/min}$ ; reducing: angle  $>180^\circ$ , frequency  $<60\text{r/min}$

#### 4-week group

Acupuncture treatments will consist of 12 sessions, each lasting 30 minutes, and will be administered 3 times per week over 4 weeks. Single-use aseptic needles (length: 25-40mm, diameter: 0.25mm, Hwato, Suzhou, China) will be used. Before needle insertion, both acupuncturist's hands and acupuncture site will be strictly disinfected

1  
2  
3  
4 with 75% alcohol. Then acupuncturists will proceed to apply the needles through the  
5  
6 skin, selecting the appropriate acupuncture angle, depth, and manipulation technique  
7  
8 as per Table 2. In order to achieve the sensation of “De Qi” (a composite sensation  
9  
10 characterized by soreness, numbness, distention or heaviness), needles will be  
11  
12 manually stimulated for a duration of 10s. Paired electrodes from an EA apparatus  
13  
14 (HANS-200A acupoint nerve stimulator; Jisheng, Nanjing, China) will be attached to  
15  
16 needle holders at LR 8-GB 33 and 2 adjunct acupoints. The electro-acupuncture  
17  
18 stimulation will be a dilatation wave of 2/100 Hz, depending on the patient’s comfort  
19  
20 level.  
21  
22  
23  
24  
25  
26  
27  
28  
29

### 30 **8-week group**

31  
32 Acupuncture treatments will consist of 24 sessions, each lasting 30 minutes, and will  
33  
34 be administered 3 times per week over 8 weeks. All other procedures will remain  
35  
36 consistent with 4-week group. The differences and similarities between two groups are  
37  
38 shown in Supplemental Table 1.  
39  
40  
41  
42  
43  
44  
45  
46  
47

### 48 **Outcomes**

49  
50 If patients with unilateral osteoarthritis, the evaluation of outcomes will pertain  
51  
52 exclusively to that knee. For bilateral osteoarthritis, the knee with worse symptoms at  
53  
54 baseline will be assessed.  
55  
56  
57

### 58 **Primary outcome**

1  
2  
3  
4 The primary outcome is the response rate at week 26, which is defined as the proportion  
5  
6 of patients achieving a minimal clinically important improvement (MCII) [40].  
7  
8 Specifically, the MCII is a  $\geq 2$ -point improvement on the NRS and a  $\geq 6$ -point  
9  
10 improvement on the Western Ontario and McMaster Universities Osteoarthritis Index  
11  
12 (WOMAC) function score compared to baseline [40]. An 11-point NRS ranges from  
13  
14 'absence of pain' (0) to 'most intense pain imaginable' (10). The WOMAC function  
15  
16 subscale scored from 0 to 68 will be used to evaluate the mean knee discomfort  
17  
18 experienced over the preceding week, with lower scores indicating better functional  
19  
20 ability.  
21  
22  
23  
24  
25  
26  
27  
28  
29

### 30 **Secondary outcomes**

31  
32 *Response rate at other time points* The response rate will be assessed at weeks 4, 8 and  
33  
34 16.  
35  
36  
37  
38  
39

40  
41 *Knee-joint pain* The mean pain experienced within the preceding week will be  
42  
43 measured using an 11-point NRS and the WOMAC pain subscale at weeks 0, 4, 8, 16  
44  
45 and 26. The WOMAC pain subscale spanning from 0 to 20 comprises 5 items [41].  
46  
47  
48 Higher scores are indicative of increased pain.  
49  
50  
51

52  
53 *Knee-joint function* The average function of the last 7 days will be measured using the  
54  
55 WOMAC function subscale at weeks 0, 4, 8, 16 and 26. The tool spans across a range  
56  
57  
58  
59  
60

1  
2  
3  
4 of 0 to 68, encompassing 17 items. Lower scores on this subscale are indicative of  
5  
6 superior physical function [41].  
7  
8  
9

10  
11 *Knee-joint stiffness* The mean stiffness throughout the preceding week will be assessed  
12  
13 via the WOMAC stiffness subscale at weeks 0, 4, 8, 16 and 26. The WOMAC stiffness  
14  
15 subscale ranges from 0 to 8, including 2 items, with higher scores indicating increased  
16  
17 stiffness [41].  
18  
19  
20  
21  
22  
23

24  
25 *Quality of life* The evaluation for the standard of living will be performed at weeks 0,  
26  
27 4, 8, 16 and 26, following the randomization process, by mean of the 12 item Short  
28  
29 Form Health Survey (SF-12) [42]. The SF-12 comprises of both mental and physical  
30  
31 domains, and each domain is calibrated from 0 to 100. Higher scores on the scale  
32  
33 indicate an improved quality of life.  
34  
35  
36  
37  
38  
39

40  
41 *Patient global assessment* The singular item of the patient global assessment concerns  
42  
43 the knee symptoms experienced by participants during the preceding week. Utilizing  
44  
45 the Visual Analogue Scale, which ranges from 0 to 100, the severity of the disease is  
46  
47 positively correlated with the magnitude of the score. This inquiry will be administered  
48  
49 at weeks 0, 4, 8, 16 and 26.  
50  
51  
52  
53

54  
55 *The Osteoarthritis Research Society International (OARSI) response rate* The  
56  
57 proportion of subjects with improvement in pain or function  $\geq 50\%$  and absolute  
58  
59  
60

1  
2  
3  
4 change  $\geq 20$ , or enhancement in a minimum of 2 of the following: pain  $\geq 20\%$  and  
5  
6 absolute change  $\geq 10$ , function  $\geq 20\%$  and absolute change  $\geq 10$ , and patient's global  
7  
8 assessment  $\geq 20\%$  and absolute change  $\geq 10$  [43]. The OARSI response rate will be  
9  
10 assessed at weeks 4, 8, 16 and 26.  
11  
12  
13  
14  
15  
16

17 *Rescue medicine* Any use of Diclofenac Sodium Enteric-coated Tablets will be  
18  
19 quantified at weeks 4, 8, 16 and 26.  
20  
21  
22  
23  
24

## 25 **Safety**

26  
27 For adverse events that occur during the trial, researchers should record the appearance  
28  
29 time, duration, classification, severity, remedial actions taken, remedial process, final  
30  
31 resolution, etc. on the case report form (CRF). Moreover, researchers will assess the  
32  
33 correlation between the intervention and the adverse event, in conjunction with other  
34  
35 potential causative and confounding factors, in a comprehensive manner. In the event  
36  
37 of serious adverse occurrences, researchers should immediately address and report to  
38  
39 the principal investigator. Adverse events comprise subcutaneous hematoma,  
40  
41 unrelenting post-injection pain, pruritus at the needle puncture location, etc. It is  
42  
43 imperative that all adverse events are meticulously tracked until resolution or  
44  
45 stabilization is achieved.  
46  
47  
48  
49  
50  
51  
52  
53  
54  
55

## 56 **Simple size**

57  
58  
59  
60

1  
2  
3  
4 Drawing upon the team's prior research, the anticipated response rates for the 4-week  
5  
6 and 8-week groups are 35% and 60% [28]. The sample size of 59 patients in each group  
7  
8 was calculated to provide 80% power, with a two-tailed  $\alpha$  level of 0.05, utilizing  
9  
10 PASS15.05 software. This requires 74 patients per group allowing for 20% dropout.  
11  
12  
13  
14  
15  
16

### 17 **Data analysis**

18  
19 Using IBM SPSS 26.0 software for statistical analysis,  $P < 0.05$  will be deemed  
20  
21 statistically significant. Measurement data will be tested for normality. For those  
22  
23 conforming to a normal distribution, the mean and standard deviation will be  
24  
25 calculated. For those that do not, median (interquartile range) will be calculated. And  
26  
27 percentages will be used to enumeration data. All randomized cases will be included  
28  
29 into intention-to-treat analysis, and missing data will be filled in using multiple  
30  
31 imputation. Per protocol analysis will only include the cases that fully complied with  
32  
33 the trial protocol and will be used for the primary outcome as sensitivity analysis. If  
34  
35 measurement data conforms to a normal distribution, it will undergo  $t$ -test analysis.  
36  
37 While it does not conform to normal distribution, it will be subjected to Mann-Whitney  
38  
39 test. Enumeration data will be analyzed via  $\chi^2$  test or Fisher's exact test. NRS and  
40  
41 WOMAC scores at multiple time points will be compared using a mixed-effects model  
42  
43 with repeated measure as sensitivity analysis. Subgroup analysis will be used for  
44  
45 potential confounders such as age, gender and weight, and affected knee. Cost  
46  
47 effectiveness of acupuncture will be assessed over 26 weeks in both 4-week and 8-  
48  
49 week groups.  
50  
51  
52  
53  
54  
55  
56  
57  
58  
59  
60

## Data management

Data collector and entry clerks, data manager, statistician and outcome assessor will undergo training in data management. At the end of the treatment phase, all participant data will be completed and recorded on the original CRFs. The data will be entered into Excel spreadsheets by the data entry clerks in time, following which the accuracy of the 2 datasets will be compared by the data manager. Any discrepancies will be corrected in accordance with the original CRFs.

All paper files related to the research will be preserved, and electronic documents will be securely stored on a password-protected computer. These research documents, whether in paper or electronic form, will be retained for a minimum of 5 years following publication. If readers and reviewers have any questions regarding our published data, they can contact the corresponding author to request the original data. Patient private information, including their name and telephone number, will be safeguarded. The trial has a low risk of safety and is not designed for interim analyses. Therefore, Data Monitoring Committee will not be established.

## Quality control

Patients will be included in strict accordance with diagnosis, inclusion and exclusion criteria. Standard operating procedures will be developed for each aspect of the trial to ensure uniformity in its implementation and provide a reference in case of disagreements. Researchers will undergo uniform training that covers the study



1  
2  
3  
4 objectives, treatment standards, random allocation, acupuncture techniques, and  
5 assessment forms. And they should strictly follow the subject design plan, fill in the  
6 CRF carefully and objectively, and record truthfully all kinds of problems that arise in  
7 the clinical trial. Compliance control will be reinforced by registering participants'  
8 contact information and then making an appointment in advance for them to come to  
9 the treatment. The inspector will regularly check the trial records. Any problems  
10 encountered will be reported to the supervisor promptly, and strict measures will be  
11 taken to identify and solve them. During the trial, various researchers will be  
12 responsible for the generation of the random number sequence, allocation concealment,  
13 patients' recruitment, acupuncture treatment and outcome measure assessment to  
14 control bias.

### 25 26 27 28 **Ethics and dissemination**

29  
30 This protocol has been approved by the Medical Ethical Committee of Beijing  
31 University of Chinese Medicine (2023BZYL0506) and registered on Chinese Clinical  
32 Trials Registry (ChiCTR2300073383). The participants' information will be kept  
33 anonymous and confidential. They can make the decision to withdraw from the trial at  
34 any time. All information will be encrypted and only the designated researcher can  
35 access to it. The study findings will be disseminated through presentation in a medical  
36 journal. Additionally, we plan to present them at selected conferences and scientific  
37 meetings.

### 38 39 40 41 42 43 44 45 46 47 48 49 50 51 52 53 **Synthesis**

54  
55 Our clinical trial incorporates rigorous scientific methodologies and comprehensive  
56 outcome measures to assess treatment response, and we will provide a high-quality  
57  
58  
59  
60

1  
2  
3  
4 report on the difference in acupuncture treatment effect between 4 and 8 weeks. It is  
5  
6 an innovative and practical approach, and the research will provide strong clinical  
7  
8 evidence of effect of various acupuncture treatment courses. All participants will  
9  
10 receive acupuncture treatment throughout the trial, without a placebo control group,  
11  
12 which will promote their compliance.  
13  
14  
15  
16  
17  
18

19 These findings will enhance the high-quality evidence on the effect of different  
20  
21 acupuncture treatment courses. Furthermore, this research will provide invaluable  
22  
23 insights for developing effective and practical treatment plans for KOA patients. It will  
24  
25 help make medical decisions, improve health insurance reimbursement programs, and  
26  
27 ensure efficient allocation of precious healthcare resources.  
28  
29  
30  
31  
32  
33  
34

### 35 **Limitations**

36  
37 Firstly, the nature of the intervention and lack of completely inert sham needles  
38  
39 preclude the possibility of blinding both acupuncturists and patients [44]. But data  
40  
41 analysts and outcome assessors will be blinded, and acupuncturists will receive training  
42  
43 on how to minimize bias by interacting less with patients. Secondly, only patients with  
44  
45 KL II or III will be included in this trial and results of the research will not be  
46  
47 generalized to patients with KL IV, who might require longer treatment courses.  
48  
49  
50  
51 Thirdly, the trial will only compare two common treatment courses of acupuncture, 4  
52  
53 weeks and 8 weeks, without any comparison to other courses.  
54  
55  
56  
57  
58  
59  
60

## **Trial status**

This trial is currently recruiting participants.

## **Acknowledgements**

We appreciate the researchers and institutions who will collaborate in this study, as well as all participants who will cooperate with our research.

## **Funding**

This research is supported by The National Science Fund for Distinguished Young Scholars (No.81825024), The National Natural Science Foundation of China (No. 82104693) and The Fundamental Research Funds for the Central Universities (2023-JYB-JBQN-028).

## **Authors' contributions**

J-FT conceived the research. J-FT and YY initiated the research design. YY, J-FT, and C-ZL drafted and critically revised the manuscript for important intellectual content. X-ZW participated in methodological improvements of the protocol. Y-WX coordinated the study. C-ZL and Y-WX sought ethical approval. Y-MF assisted in manuscript revision. J-FT, C-ZL and B-HM sought funding. Y-MF and B-HM contributed significantly to the editing of this manuscript. All authors contributed to the refinement of the research protocol and approved the final manuscript.

## Competing interests

The authors declare that they have no competing interests.

## References

- [1] Katz JN, Arant KR, Loeser RF. Diagnosis and Treatment of Hip and Knee Osteoarthritis: A Review. *JAMA* 2021;325(6):568-78. doi: 10.1001/jama.2020.22171
- [2] Hunter DJ, Bierma-Zeinstra S. Osteoarthritis. *Lancet* 2019;393(10182):1745-59. doi: 10.1016/S0140-6736(19)30417-9
- [3] Safiri S, Kolahi AA, Smith E, et al. Global, regional and national burden of osteoarthritis 1990-2017: a systematic analysis of the Global Burden of Disease Study 2017. *Ann Rheum Dis* 2020;79(6):819-28. doi: 10.1136/annrheumdis-2019-216515
- [4] Chen AT, Shrestha S, Collins JE, et al. Estimating contextual effect in nonpharmacological therapies for pain in knee osteoarthritis: a systematic analytic review. *Osteoarthritis Cartilage* 2020;28(9):1154-69. doi: 10.1016/j.joca.2020.05.007
- [5] Silverwood V, Blagojevic-Bucknall M, Jinks C, et al. Current evidence on risk factors for knee osteoarthritis in older adults: a systematic review and meta-analysis. *Osteoarthritis Cartilage* 2015;23(4):507-15. doi: 10.1016/j.joca.2014.11.019
- [6] Cross M, Smith E, Hoy D, et al. The global burden of hip and knee osteoarthritis: estimates from the global burden of disease 2010 study. *Ann Rheum Dis* 2014;73(7):1323-30. doi: 10.1136/annrheumdis-2013-204763
- [7] Hardenberg M, Spekle EM, Coenen P, et al. The economic burden of knee and hip osteoarthritis: absenteeism and costs in the Dutch workforce. *BMC Musculoskelet Disord* 2022;23(1):364. doi: 10.1186/s12891-022-05306-9
- [8] Kolasinski SL, Neogi T, Hochberg MC, et al. 2019 American College of Rheumatology/Arthritis Foundation Guideline for the Management of Osteoarthritis of the Hand, Hip, and Knee. *Arthritis Rheumatol* 2020;72(2):220-33. doi: 10.1002/art.41142
- [9] Nelson AE, Allen KD, Golightly YM, et al. A systematic review of recommendations and guidelines for the management of osteoarthritis: The chronic osteoarthritis management initiative of the U.S. bone and joint initiative. *Semin Arthritis Rheum* 2014;43(6):701-12. doi: 10.1016/j.semarthrit.2013.11.012
- [10] da Costa BR, Reichenbach S, Keller N, et al. Effectiveness of non-steroidal anti-inflammatory drugs for the treatment of pain in knee and hip osteoarthritis: a network meta-analysis. *Lancet* 2017;390(10090):e21-e33. doi: 10.1016/S0140-6736(17)31744-0
- [11] da Costa BR, Reichenbach S, Keller N, et al. RETRACTED: Effectiveness of non-steroidal anti-inflammatory drugs for the treatment of pain in knee and hip osteoarthritis: a network meta-analysis. *Lancet* 2016;387(10033):2093-105. doi: 10.1016/S0140-6736(16)30002-2
- [12] Juni P, Hari R, Rutjes AW, et al. Intra-articular corticosteroid for knee osteoarthritis. *Cochrane Database Syst Rev* 2015;2015(10):CD005328. doi: 10.1002/14651858.CD005328.pub3
- [13] Orchard JW. Is there a place for intra-articular corticosteroid injections in the treatment of knee osteoarthritis? *BMJ* 2020;368:l6923. doi: 10.1136/bmj.l6923
- [14] Cepeda MS, Camargo F, Zea C, et al. Tramadol for osteoarthritis: a systematic review and

- metaanalysis. *J Rheumatol* 2007;34(3):543-55
- [15] da Costa BR, Nuesch E, Kasteler R, et al. Oral or transdermal opioids for osteoarthritis of the knee or hip. *Cochrane Database Syst Rev* 2014(9):CD003115. doi: 10.1002/14651858.CD003115.pub4
- [16] da Costa BR, Pereira TV, Saadat P, et al. Effectiveness and safety of non-steroidal anti-inflammatory drugs and opioid treatment for knee and hip osteoarthritis: network meta-analysis. *BMJ* 2021;375:n2321. doi: 10.1136/bmj.n2321
- [17] Osani MC, Lohmander LS, Bannuru RR. Is There Any Role for Opioids in the Management of Knee and Hip Osteoarthritis? A Systematic Review and Meta-Analysis. *Arthritis Care Res (Hoboken)* 2021;73(10):1413-24. doi: 10.1002/acr.24363
- [18] Price AJ, Alvand A, Troelsen A, et al. Knee replacement. *Lancet* 2018;392(10158):1672-82. doi: 10.1016/S0140-6736(18)32344-4
- [19] Hunter DJ, Harris RE. Acupuncture and Knee Osteoarthritis: Does Dose Matter? *Arthritis Rheumatol* 2021;73(3):371-73. doi: 10.1002/art.41583
- [20] Chon TY, Lee MC. Acupuncture. *Mayo Clin Proc* 2013;88(10):1141-6. doi: 10.1016/j.mayocp.2013.06.009
- [21] Witt CM, Reinhold T, Jena S, et al. Cost-effectiveness of acupuncture treatment in patients with headache. *Cephalalgia* 2008;28(4):334-45. doi: 10.1111/j.1468-2982.2007.01504.x
- [22] MacPherson H, Thomas K, Walters S, et al. The York acupuncture safety study: prospective survey of 34 000 treatments by traditional acupuncturists. *BMJ* 2001;323(7311):486-7. doi: 10.1136/bmj.323.7311.486
- [23] Vickers AJ, Vertosick EA, Lewith G, et al. Acupuncture for Chronic Pain: Update of an Individual Patient Data Meta-Analysis. *J Pain* 2018;19(5):455-74. doi: 10.1016/j.jpain.2017.11.005
- [24] Mei F, Yao M, Wang Y, et al. Acupuncture for knee osteoarthritis: A systematic review and meta-analysis. *J Evid Based Med* 2023;16(2):138-40. doi: 10.1111/jebm.12532
- [25] Brophy RH, Fillingham YA. AAOS Clinical Practice Guideline Summary: Management of Osteoarthritis of the Knee (Nonarthroplasty), Third Edition. *J Am Acad Orthop Surg* 2022;30(9):e721-e29. doi: 10.5435/JAAOS-D-21-01233
- [26] Sun N, Tu JF, Lin LL, et al. Correlation between acupuncture dose and effectiveness in the treatment of knee osteoarthritis: a systematic review. *Acupunct Med* 2019;37(5):261-67. doi: 10.1136/acupmed-2017-011608
- [27] Witt C, Brinkhaus B, Jena S, et al. Acupuncture in patients with osteoarthritis of the knee: a randomised trial. *Lancet* 2005;366(9480):136-43. doi: 10.1016/S0140-6736(05)66871-7
- [28] Tu JF, Yang JW, Shi GX, et al. Efficacy of Intensive Acupuncture Versus Sham Acupuncture in Knee Osteoarthritis: A Randomized Controlled Trial. *Arthritis Rheumatol* 2021;73(3):448-58. doi: 10.1002/art.41584
- [29] Chen N, Wang J, Mucelli A, et al. Electro-Acupuncture is Beneficial for Knee Osteoarthritis: The Evidence from Meta-Analysis of Randomized Controlled Trials. *Am J Chin Med* 2017;45(5):965-85. doi: 10.1142/S0192415X17500513
- [30] Chen Y, Jia YJ, Lu JH, et al. [Comparison of therapeutic effect of different acupuncture methods for knee osteoarthritis]. *Zhen Ci Yan Jiu* 2020;45(7):569-73. doi: 10.13702/j.1000-0607.191015
- [31] Bao F, Zhang Y, Wu ZH, et al. [Efficacy observation on knee osteoarthritis treated with electroacupuncture and its influence on articular cartilage with T2 mapping]. *Zhongguo Zhen Jiu* 2013;33(3):193-7
- [32] Sangdee C, Teekachunhatean S, Sananpanich K, et al. Electroacupuncture versus diclofenac in

- 1  
2  
3 symptomatic treatment of osteoarthritis of the knee: a randomized controlled trial. *BMC*  
4 *Complement Altern Med* 2002;2:3. doi: 10.1186/1472-6882-2-3
- 5  
6 [33] Huang DE, Qin Y, Lin MN, et al. [Clinical efficacy of different waves of electroacupuncture on  
7 knee osteoarthritis and its effect on TGF-beta1 in joint fluid]. *Zhongguo Zhen Jiu* 2020;40(4):370-  
8 4. doi: 10.13703/j.0255-2930.20190422-0005
- 9  
10 [34] Lu N, Cheng P, Xia JX, et al. [Effect of acupuncture combined with moxibustion on serum matrix  
11 metalloproteinase-9 and matrix metalloproteinase inhibitor-1 in patients with knee osteoarthritis].  
12 *Zhen Ci Yan Jiu* 2022;47(3):262-7. doi: 10.10372/j.1000-0607.20210079
- 13  
14 [35] Luo X, Liu J, Li Q, et al. Acupuncture for treatment of knee osteoarthritis: A clinical practice  
15 guideline. *J Evid Based Med* 2023;16(2):237-45. doi: 10.1111/jebm.12526
- 16  
17 [36] Yu Y, Kang SB, Tu JF, et al. Effect of acupuncture duration in patients with knee osteoarthritis: A  
18 secondary analysis of a multi-center randomized controlled trial. *World J Acupunct Moxibustion*  
19 2023;33(4):372-6. doi: 10.1016/j.wjam.2023.10.004
- 20  
21 [37] Chan AW, Tetzlaff JM, Altman DG, et al. SPIRIT 2013 statement: defining standard protocol items  
22 for clinical trials. *Ann Intern Med* 2013;158(3):200-7. doi: 10.7326/0003-4819-158-3-201302050-  
23 00583
- 24  
25 [38] Hochberg MC, Altman RD, Brandt KD, et al. Guidelines for the medical management of  
26 osteoarthritis. Part II. Osteoarthritis of the knee. American College of Rheumatology. *Arthritis*  
27 *Rheum* 1995;38(11):1541-6. doi: 10.1002/art.1780381104
- 28  
29 [39] Jensen MP, Karoly P, Braver S. The measurement of clinical pain intensity: a comparison of six  
30 methods. *Pain* 1986;27(1):117-26. doi: 10.1016/0304-3959(86)90228-9
- 31  
32 [40] Tubach F, Ravaud P, Baron G, et al. Evaluation of clinically relevant changes in patient reported  
33 outcomes in knee and hip osteoarthritis: the minimal clinically important improvement. *Ann Rheum*  
34 *Dis* 2005;64(1):29-33. doi: 10.1136/ard.2004.022905
- 35  
36 [41] Bellamy N, Buchanan WW, Goldsmith CH, et al. Validation study of WOMAC: a health status  
37 instrument for measuring clinically important patient relevant outcomes to antirheumatic drug  
38 therapy in patients with osteoarthritis of the hip or knee. *J Rheumatol* 1988;15(12):1833-40
- 39  
40 [42] Ware J, Jr., Kosinski M, Keller SD. A 12-Item Short-Form Health Survey: construction of scales  
41 and preliminary tests of reliability and validity. *Med Care* 1996;34(3):220-33. doi:  
42 10.1097/00005650-199603000-00003
- 43  
44 [43] Pham T, Van Der Heijde D, Lassere M, et al. Outcome variables for osteoarthritis clinical trials:  
45 The OMERACT-OARSI set of responder criteria. *J Rheumatol* 2003;30(7):1648-54
- 46  
47 [44] Lee B, Kim TH, Birch S, et al. Comparative effectiveness of acupuncture in sham-controlled trials  
48 for knee osteoarthritis: A systematic review and network meta-analysis. *Front Med (Lausanne)*  
49 2022;9:1061878. doi: 10.3389/fmed.2022.1061878
- 50  
51

## 52 Figure legends

53  
54 Figure 1 The schedule of assessments

55  
56  
57  
58  
59  
60

1  
2  
3  
4 NRS: numerical rating scale, WOMAC: Western Ontario and McMaster Universities  
5  
6 Osteoarthritis Index, SF-12: 12 item Short Form Health Survey, OARSI: Osteoarthritis  
7  
8  
9 Research Society International

10  
11 Figure 2 The flow diagram of the trial

12  
13  
14 KOA: knee osteoarthritis

15  
16  
17 Figure 3 Meridian acupoints chart

18  
19 Red points: obligatory acupoints; blue points: foot yangming meridian syndrome;  
20  
21 purple points: foot shaoyang meridian syndrome; yellow points: foot taiyang meridian  
22  
23 syndrome; green points: foot three-yin meridian syndrome  
24  
25  
26  
27  
28  
29  
30  
31  
32  
33  
34  
35  
36  
37  
38  
39  
40  
41  
42  
43  
44  
45  
46  
47  
48  
49  
50  
51  
52  
53  
54  
55  
56  
57  
58  
59  
60

| Time point                        | Study period |            |                |        |         |          |
|-----------------------------------|--------------|------------|----------------|--------|---------|----------|
|                                   | Enrollment   | Allocation | Postallocation |        |         | Closeout |
|                                   | Week -1      | Week 0     | Week 4         | Week 8 | Week 16 | Week 26  |
| Enrollment:<br>Eligibility screen | x            |            |                |        |         |          |
| Informed consent                  | x            |            |                |        |         |          |
| Allocation                        |              | x          |                |        |         |          |
| Interventions:<br>4-week group    |              |            | ←→             |        |         |          |
| 8-week group                      |              |            | ←→             |        |         |          |
| Assessment:<br>Response rate      |              |            | x              | x      | x       | x        |
| NRS                               | x            |            | x              | x      | x       | x        |
| WOAMC                             | x            |            | x              | x      | x       | x        |
| SF-12                             | x            |            | x              | x      | x       | x        |
| Patient global assessment         | x            |            | x              | x      | x       | x        |
| The OARSI response rate           |              |            | x              | x      | x       | x        |
| Rescue medicine                   |              |            | x              | x      | x       | x        |
| Adverse events                    |              |            | x              | x      | x       | x        |

NRS: numerical rating scale, WOMAC: Western Ontario and McMaster Universities Osteoarthritis Index, SF-12: 12 item Short Form Health Survey, OARSI: Osteoarthritis Research Society International

38x21mm (1200 x 1200 DPI)



1  
2  
3  
4  
5  
6  
7  
8  
9  
10  
11  
12  
13  
14  
15  
16  
17  
18  
19  
20  
21  
22  
23  
24  
25  
26  
27  
28  
29  
30  
31  
32  
33  
34  
35  
36  
37  
38  
39  
40  
41  
42  
43  
44  
45  
46  
47  
48  
49  
50  
51  
52  
53  
54  
55  
56  
57  
58  
59  
60

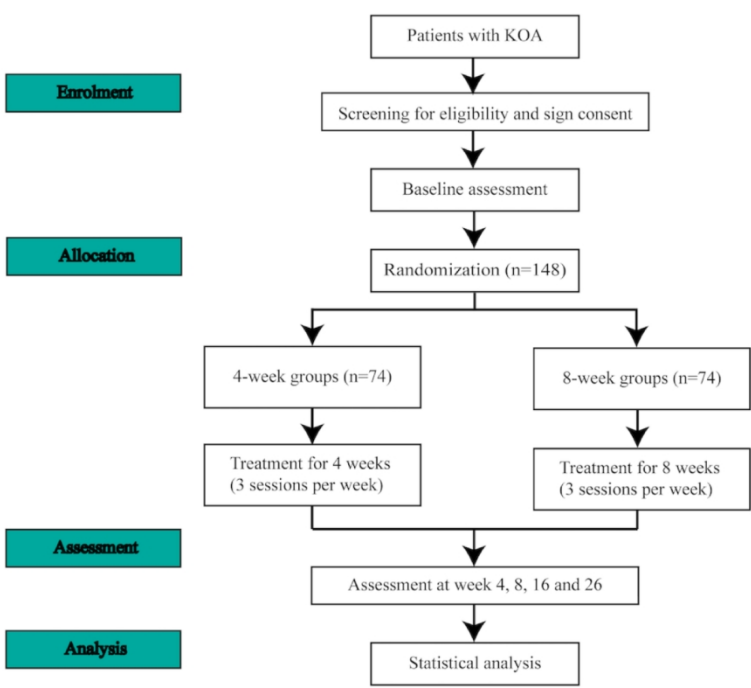

KOA: knee osteoarthritis

34x25mm (1200 x 1200 DPI)

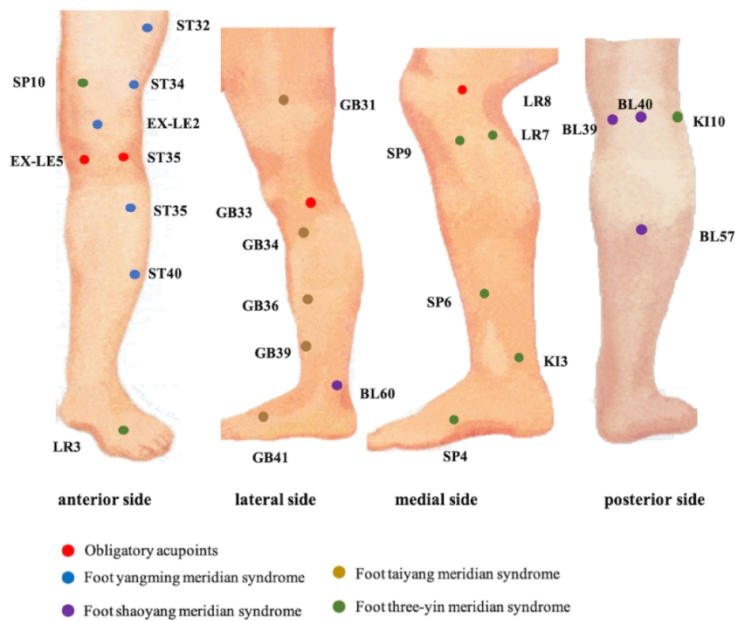

Red points: obligatory acupoints; blue points: foot yangming meridian syndrome; purple points: foot shaoyang meridian syndrome; yellow points: foot taiyang meridian syndrome; green points: foot three-yin meridian syndrome

33x20mm (1200 x 1200 DPI)

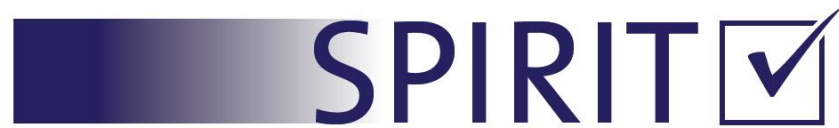

STANDARD PROTOCOL ITEMS: RECOMMENDATIONS FOR INTERVENTIONAL TRIALS

### **SPIRIT 2013 Checklist: Recommended items to address in a clinical trial protocol and related documents\***

| <b>Section/item</b>               | <b>Item No</b> | <b>Description</b>                                                                                                                                                                                                                                                                       | <b>Page</b> |
|-----------------------------------|----------------|------------------------------------------------------------------------------------------------------------------------------------------------------------------------------------------------------------------------------------------------------------------------------------------|-------------|
| <b>Administrative information</b> |                |                                                                                                                                                                                                                                                                                          |             |
| Title                             | 1              | Descriptive title identifying the study design, population, interventions, and, if applicable, trial acronym                                                                                                                                                                             | 1           |
| Trial registration                | 2a             | Trial identifier and registry name. If not yet registered, name of intended registry                                                                                                                                                                                                     | 3           |
|                                   | 2b             | All items from the World Health Organization Trial Registration Data Set                                                                                                                                                                                                                 | 5-16        |
| Protocol version                  | 3              | Date and version identifier                                                                                                                                                                                                                                                              | 3           |
| Funding                           | 4              | Sources and types of financial, material, and other support                                                                                                                                                                                                                              | 20          |
| Roles and responsibilities        | 5a             | Names, affiliations, and roles of protocol contributors                                                                                                                                                                                                                                  | 1-2,21      |
|                                   | 5b             | Name and contact information for the trial sponsor                                                                                                                                                                                                                                       | 20          |
|                                   | 5c             | Role of study sponsor and funders, if any, in study design; collection, management, analysis, and interpretation of data; writing of the report; and the decision to submit the report for publication, including whether they will have ultimate authority over any of these activities | 20          |
|                                   | 5d             | Composition, roles, and responsibilities of the coordinating centre, steering committee, endpoint adjudication committee, data management team, and other individuals or groups overseeing the trial, if applicable (see Item 21a for data monitoring committee)                         | 15-16       |

### **SPIRIT 2013 Checklist: Recommended items to address in a clinical trial protocol and related documents\*(continued)**

| Section/item                                                                                                              | Item No | Description                                                                                                                                                                                               | Page           |
|---------------------------------------------------------------------------------------------------------------------------|---------|-----------------------------------------------------------------------------------------------------------------------------------------------------------------------------------------------------------|----------------|
| <b>Introduction</b>                                                                                                       |         |                                                                                                                                                                                                           |                |
| Background and rationale                                                                                                  | 6a      | Description of research question and justification for undertaking the trial, including summary of relevant studies (published and unpublished) examining benefits and harms for each intervention        | 5-6            |
|                                                                                                                           | 6b      | Explanation for choice of comparators                                                                                                                                                                     | 5-6,18         |
| Objectives                                                                                                                | 7       | Specific objectives or hypotheses                                                                                                                                                                         | 6              |
| Trial design                                                                                                              | 8       | Description of trial design including type of trial (eg, parallel group, crossover, factorial, single group), allocation ratio, and framework (eg, superiority, equivalence, noninferiority, exploratory) | 6-7            |
| <b>Methods: Participants, interventions, and outcomes</b>                                                                 |         |                                                                                                                                                                                                           |                |
| Study setting                                                                                                             | 9       | Description of study settings (eg, community clinic, academic hospital) and list of countries where data will be collected. Reference to where list of study sites can be obtained                        | 7              |
| Eligibility criteria                                                                                                      | 10      | Inclusion and exclusion criteria for participants. If applicable, eligibility criteria for study centres and individuals who will perform the interventions (eg, surgeons, psychotherapists)              | 7-8            |
| Interventions                                                                                                             | 11a     | Interventions for each group with sufficient detail to allow replication, including how and when they will be administered                                                                                | 9-12           |
|                                                                                                                           | 11b     | Criteria for discontinuing or modifying allocated interventions for a given trial participant (eg, drug dose change in response to harms, participant request, or improving/worsening disease)            | Not applicable |
| <b>SPIRIT 2013 Checklist: Recommended items to address in a clinical trial protocol and related documents*(continued)</b> |         |                                                                                                                                                                                                           |                |

1  
2  
3  
4  
5  
6  
7  
8  
9  
10  
11  
12  
13  
14  
15  
16  
17  
18  
19  
20  
21  
22  
23  
24  
25  
26  
27  
28  
29  
30  
31  
32  
33  
34  
35  
36  
37  
38  
39  
40  
41  
42  
43  
44  
45  
46

| Section/item         | Item No | Description                                                                                                                                                                                                                                                                                                                                                                    | Page                   |
|----------------------|---------|--------------------------------------------------------------------------------------------------------------------------------------------------------------------------------------------------------------------------------------------------------------------------------------------------------------------------------------------------------------------------------|------------------------|
|                      | 11c     | Strategies to improve adherence to intervention protocols, and any procedures for monitoring adherence (eg, drug tablet return, laboratory tests)                                                                                                                                                                                                                              | 9                      |
|                      | 11d     | Relevant concomitant care and interventions that are permitted or prohibited during the trial                                                                                                                                                                                                                                                                                  | 9                      |
| Outcomes             | 12      | Primary, secondary, and other outcomes, including the specific measurement variable (eg, systolic blood pressure), analysis metric (eg, change from baseline, final value, time to event), method of aggregation (eg, median, proportion), and time point for each outcome. Explanation of the clinical relevance of chosen efficacy and harm outcomes is strongly recommended | 12-15                  |
| Participant timeline | 13      | Time schedule of enrolment, interventions (including any run-ins and washouts), assessments, and visits for participants. A schematic diagram is highly recommended (see Figure)                                                                                                                                                                                               | 6-7, Figure 1, Table 4 |
| Sample size          | 14      | Estimated number of participants needed to achieve study objectives and how it was determined, including clinical and statistical assumptions supporting any sample size calculations                                                                                                                                                                                          | 16-17                  |
| Recruitment          | 15      | Strategies for achieving adequate participant enrolment to reach target sample size                                                                                                                                                                                                                                                                                            | 7                      |

**Methods: Assignment of interventions (for controlled trials)**

Allocation:

|                     |     |                                                                                                                                                                                                                                                                                                                                                          |     |
|---------------------|-----|----------------------------------------------------------------------------------------------------------------------------------------------------------------------------------------------------------------------------------------------------------------------------------------------------------------------------------------------------------|-----|
| Sequence generation | 16a | Method of generating the allocation sequence (eg, computer-generated random numbers), and list of any factors for stratification. To reduce predictability of a random sequence, details of any planned restriction (eg, blocking) should be provided in a separate document that is unavailable to those who enrol participants or assign interventions | 8-9 |
|---------------------|-----|----------------------------------------------------------------------------------------------------------------------------------------------------------------------------------------------------------------------------------------------------------------------------------------------------------------------------------------------------------|-----|

**SPIRIT 2013 Checklist: Recommended items to address in a clinical trial protocol and related documents\*(continued)**

| Section/item                                              | Item No | Description                                                                                                                                                                                                                                                                                                                                                                                                  | Page  |
|-----------------------------------------------------------|---------|--------------------------------------------------------------------------------------------------------------------------------------------------------------------------------------------------------------------------------------------------------------------------------------------------------------------------------------------------------------------------------------------------------------|-------|
| Allocation concealment mechanism                          | 16b     | Mechanism of implementing the allocation sequence (eg, central telephone; sequentially numbered, opaque, sealed envelopes), describing any steps to conceal the sequence until interventions are assigned                                                                                                                                                                                                    | 8-9   |
| Implementation                                            | 16c     | Who will generate the allocation sequence, who will enrol participants, and who will assign participants to interventions                                                                                                                                                                                                                                                                                    | 8-9   |
| Blinding (masking)                                        | 17a     | Who will be blinded after assignment to interventions (eg, trial participants, care providers, outcome assessors, data analysts), and how                                                                                                                                                                                                                                                                    | 9     |
|                                                           | 17b     | If blinded, circumstances under which unblinding is permissible, and procedure for revealing a participant's allocated intervention during the trial                                                                                                                                                                                                                                                         | 9     |
| <b>Methods: Data collection, management, and analysis</b> |         |                                                                                                                                                                                                                                                                                                                                                                                                              |       |
| Data collection methods                                   | 18a     | Plans for assessment and collection of outcome, baseline, and other trial data, including any related processes to promote data quality (eg, duplicate measurements, training of assessors) and a description of study instruments (eg, questionnaires, laboratory tests) along with their reliability and validity, if known. Reference to where data collection forms can be found, if not in the protocol | 15-16 |
|                                                           | 18b     | Plans to promote participant retention and complete follow-up, including list of any outcome data to be collected for participants who discontinue or deviate from intervention protocols                                                                                                                                                                                                                    | 15-16 |
| Data management                                           | 19      | Plans for data entry, coding, security, and storage, including any related processes to promote data quality (eg, double data entry; range checks for data values). Reference to where details of data management procedures can be found, if not in the protocol                                                                                                                                            | 15-16 |
| Statistical methods                                       | 20a     | Statistical methods for analysing primary and secondary outcomes. Reference to where other details of the statistical analysis plan can be found, if not in the protocol                                                                                                                                                                                                                                     | 17-18 |

**SPIRIT 2013 Checklist: Recommended items to address in a clinical trial protocol and related documents\*(continued)**

1  
2  
3  
4  
5  
6  
7  
8  
9  
10  
11  
12  
13  
14  
15  
16  
17  
18  
19  
20  
21  
22  
23  
24  
25  
26  
27  
28  
29  
30  
31  
32  
33  
34  
35  
36  
37  
38  
39  
40  
41  
42  
43  
44  
45  
46

| Section/item                    | Item No | Description                                                                                                                                                                                                                                                                                                                           | Page           |
|---------------------------------|---------|---------------------------------------------------------------------------------------------------------------------------------------------------------------------------------------------------------------------------------------------------------------------------------------------------------------------------------------|----------------|
|                                 | 20b     | Methods for any additional analyses (eg, subgroup and adjusted analyses)                                                                                                                                                                                                                                                              | 17-18          |
|                                 | 20c     | Definition of analysis population relating to protocol non-adherence (eg, as randomised analysis), and any statistical methods to handle missing data (eg, multiple imputation)                                                                                                                                                       | 17-18          |
| <b>Methods: Monitoring</b>      |         |                                                                                                                                                                                                                                                                                                                                       |                |
| Data monitoring                 | 21a     | Composition of data monitoring committee (DMC); summary of its role and reporting structure; statement of whether it is independent from the sponsor and competing interests; and reference to where further details about its charter can be found, if not in the protocol. Alternatively, an explanation of why a DMC is not needed | 16             |
|                                 | 21b     | Description of any interim analyses and stopping guidelines, including who will have access to these interim results and make the final decision to terminate the trial                                                                                                                                                               | Not applicable |
| Harms                           | 22      | Plans for collecting, assessing, reporting, and managing solicited and spontaneously reported adverse events and other unintended effects of trial interventions or trial conduct                                                                                                                                                     | 15             |
| Auditing                        | 23      | Frequency and procedures for auditing trial conduct, if any, and whether the process will be independent from investigators and the sponsor                                                                                                                                                                                           | 15-16          |
| <b>Ethics and dissemination</b> |         |                                                                                                                                                                                                                                                                                                                                       |                |
| Research ethics approval        | 24      | Plans for seeking research ethics committee/institutional review board (REC/IRB) approval                                                                                                                                                                                                                                             | 21             |
| Protocol amendments             | 25      | Plans for communicating important protocol modifications (eg, changes to eligibility criteria, outcomes, analyses) to relevant parties (eg, investigators, REC/IRBs, trial participants, trial registries, journals, regulators)                                                                                                      | Not applicable |

**SPIRIT 2013 Checklist: Recommended items to address in a clinical trial protocol and related documents\*(continued)**

| Section/item                  | Item No | Description                                                                                                                                                                                                                                                                         | Page           |
|-------------------------------|---------|-------------------------------------------------------------------------------------------------------------------------------------------------------------------------------------------------------------------------------------------------------------------------------------|----------------|
| Consent or assent             | 26a     | Who will obtain informed consent or assent from potential trial participants or authorised surrogates, and how (see Item 32)                                                                                                                                                        | 7              |
|                               | 26b     | Additional consent provisions for collection and use of participant data and biological specimens in ancillary studies, if applicable                                                                                                                                               | Not applicable |
| Confidentiality               | 27      | How personal information about potential and enrolled participants will be collected, shared, and maintained in order to protect confidentiality before, during, and after the trial                                                                                                | 15             |
| Declaration of interests      | 28      | Financial and other competing interests for principal investigators for the overall trial and each study site                                                                                                                                                                       | 21-22          |
| Access to data                | 29      | Statement of who will have access to the final trial dataset, and disclosure of contractual agreements that limit such access for investigators                                                                                                                                     | 20-21          |
| Ancillary and post-trial care | 30      | Provisions, if any, for ancillary and post-trial care, and for compensation to those who suffer harm from trial participation                                                                                                                                                       | Not applicable |
| Dissemination policy          | 31a     | Plans for investigators and sponsor to communicate trial results to participants, healthcare professionals, the public, and other relevant groups (eg, via publication, reporting in results databases, or other data sharing arrangements), including any publication restrictions | 20-21          |
|                               | 31b     | Authorship eligibility guidelines and any intended use of professional writers                                                                                                                                                                                                      | 20-21          |
|                               | 31c     | Plans, if any, for granting public access to the full protocol, participant-level dataset, and statistical code                                                                                                                                                                     | Not applicable |

**SPIRIT 2013 Checklist: Recommended items to address in a clinical trial protocol and related documents\*(continued)**



1  
2  
3  
4  
5  
6  
7  
8  
9  
10  
11  
12  
13  
14  
15  
16  
17  
18  
19  
20  
21  
22  
23  
24  
25  
26  
27  
28  
29  
30  
31  
32  
33  
34  
35  
36  
37  
38  
39  
40  
41  
42  
43  
44  
45  
46

| Section/item               | Item No | Description                                                                                                                                                                                    | Page               |
|----------------------------|---------|------------------------------------------------------------------------------------------------------------------------------------------------------------------------------------------------|--------------------|
| <b>Appendices</b>          |         |                                                                                                                                                                                                |                    |
| Informed consent materials | 32      | Model consent form and other related documentation given to participants and authorised surrogates                                                                                             | supplementary file |
| Biological specimens       | 33      | Plans for collection, laboratory evaluation, and storage of biological specimens for genetic or molecular analysis in the current trial and for future use in ancillary studies, if applicable | Not applicable     |

\*It is strongly recommended that this checklist be read in conjunction with the SPIRIT 2013 Explanation & Elaboration for important clarification on the items. Amendments to the protocol should be tracked and dated. The SPIRIT checklist is copyrighted by the SPIRIT Group under the Creative Commons "[Attribution-NonCommercial-NoDerivs 3.0 Unported](https://creativecommons.org/licenses/by-nc-nd/3.0/)" license.

review only

**Supplemental Table 1 Differences and similarities for 4-week group and 8-week group**

|                | 4-week group                                  | 8-week group                                  |
|----------------|-----------------------------------------------|-----------------------------------------------|
| Course         | 4 weeks                                       | 8 weeks                                       |
| Session        | 12 sessions                                   | 24 sessions                                   |
| Frequency      | 3 times per week                              | 3 times per week                              |
| Duration       | 30 minutes each                               | 30 minutes each                               |
| Acupoint       | 5 essential acupoints and 3 adjunct acupoints | 5 essential acupoints and 3 adjunct acupoints |
| EA stimulation | a dilatation wave of 2/100 Hz                 | a dilatation wave of 2/100 Hz                 |

For peer review only
