# Supplementary material for: Effect of 4 weeks vs 8 weeks of acupuncture for knee osteoarthritis in China: protocol for a randomised controlled trial
Source: PubMed Central journal article supplement — BMJ Open. 2024 Jan 24;14(1):e079709. doi: 10.1136/bmjopen-2023-079709 (PMC10824056; doi:10.1136/bmjopen-2023-079709), 2024-01-24
Supplement: bmjopen-2023-079709supp002.pdf [file bmjopen-2023-079709supp002.pdf]

**Supplemental Table 1 Differences and similarities for 4-week group and 8-week group**

|                | 4-week group                                  | 8-week group                                  |
|----------------|-----------------------------------------------|-----------------------------------------------|
| Course         | 4 weeks                                       | 8 weeks                                       |
| Session        | 12 sessions                                   | 24 sessions                                   |
| Frequency      | 3 times per week                              | 3 times per week                              |
| Duration       | 30 minutes each                               | 30 minutes each                               |
| Acupoint       | 5 essential acupoints and 3 adjunct acupoints | 5 essential acupoints and 3 adjunct acupoints |
| EA stimulation | a dilatation wave of 2/100 Hz                 | a dilatation wave of 2/100 Hz                 |
